# Supplementary material for: Insulated π-conjugated 2,2′-bipyridine transition-metal complexes: enhanced photoproperties in luminescence and catalysis
Source: Royal Society of Chemistry journal article supplement (doi:10.1039/d4sc01046a), 2024-01-01
Supplement: d4sc01046a1.pdf [file d4sc01046a1.pdf]

## Supplementary Information

### Insulated $\pi$ -Conjugated 2,2'-Bipyridine Transition-Metal Complexes: Enhanced Photoproperties in Luminescence and Catalysis

Tomohiro Iwai,\* Shinsuke Abe, Shin-ya Takizawa, Hiroshi Masai and Jun Terao\*

*E-mail: ciwai@g.ecc.u-tokyo.ac.jp (T.I.), cterao@mail.ecc.u-tokyo.ac.jp (J.T.)*

#### Table of Contents

|                                                                                                    |    |
|----------------------------------------------------------------------------------------------------|----|
| 1.1 Materials.....                                                                                 | 3  |
| 1.2 Experimental equipment .....                                                                   | 3  |
| 2. Synthetic procedures and NMR spectra of <b>L1–L3</b> .....                                      | 5  |
| 2.1 Synthesis and NMR spectra of compound <b>2</b> .....                                           | 7  |
| 2.2 Synthesis and NMR spectra of compound <b>3</b> .....                                           | 9  |
| 2.3 Synthesis and NMR spectra of compound <b>4</b> .....                                           | 11 |
| 2.4 Synthesis and NMR spectra of compound <b>5</b> .....                                           | 13 |
| 2.5 Synthesis and NMR spectra of compound <b>L1</b> .....                                          | 15 |
| 2.6 Synthesis and NMR spectra of compound <b>L2</b> .....                                          | 18 |
| 2.7 Synthesis and NMR spectra of compound <b>S2</b> .....                                          | 20 |
| 2.8 Synthesis and NMR spectra of compound <b>S3</b> .....                                          | 22 |
| 2.9 Synthesis and NMR spectra of compound <b>L3</b> .....                                          | 24 |
| 3. Synthetic procedures and NMR spectra of biscyclometalated iridium complexes.....                | 26 |
| 3.1 Synthesis and NMR spectra of complex [Ir(ppy) <sub>2</sub> ( <b>L1</b> )]PF <sub>6</sub> ..... | 26 |
| 3.2 Synthesis and NMR spectra of complex [Ir(ppy) <sub>2</sub> ( <b>L2</b> )]PF <sub>6</sub> ..... | 28 |
| 3.3 Synthesis and NMR spectra of complex [Ir(ppy) <sub>2</sub> ( <b>L3</b> )]PF <sub>6</sub> ..... | 30 |
| 4. General procedures for photochemical experiments.....                                           | 32 |
| 4.1 Experimental procedure for C–O coupling reactions with alcohols .....                          | 32 |
| 4.2 Experimental procedure for C–O coupling reactions with H <sub>2</sub> O .....                  | 32 |
| 4.3 Experimental procedure for C–N coupling reaction .....                                         | 33 |
| 5. Characterization of products .....                                                              | 33 |
| 5.1 Characterization of 4-methoxybenzonitrile ( <b>7a</b> ).....                                   | 33 |
| 5.2 Characterization of methyl 4-methoxybenzoate ( <b>7b</b> ) .....                               | 35 |
| 5.3 Characterization of 1,4-dimethoxybenzene ( <b>7c</b> ).....                                    | 37 |
| 5.4 Characterization of 4-(hexyloxy)benzonitrile ( <b>7d</b> ) .....                               | 39 |
| 5.5 Characterization of 4-(cyclopentyloxy)benzonitrile ( <b>7e</b> ).....                          | 41 |
| 5.6 Characterization of 4-hydroxybenzonitrile ( <b>7f</b> ) .....                                  | 43 |
| 5.7 Characterization of 2-hydroxybenzonitrile ( <b>7g</b> ).....                                   | 45 |
| 5.8 Characterization of 4-(octylamino)benzonitrile ( <b>8a</b> ) .....                             | 47 |
| 6. Theoretical calculations .....                                                                  | 49 |
| 6.1 Theoretical calculation for <b>L1</b> .....                                                    | 49 |
| 6.2 Theoretical calculation for [Ir(ppy) <sub>2</sub> ( <b>L3</b> )] <sup>+</sup> .....            | 56 |

|                                                                                    |    |
|------------------------------------------------------------------------------------|----|
| 6.3 Theoretical calculation for NiCl <sub>2</sub> ( <b>L3</b> ) .....              | 59 |
| 7. Absorption spectra .....                                                        | 62 |
| 8. Cyclic voltammetry .....                                                        | 64 |
| 9. Mass and NMR spectroscopic studies on the coordination of <b>L1</b> to Ni ..... | 65 |
| Abbreviation.....                                                                  | 70 |
| References .....                                                                   | 70 |

## 1. General remarks

### 1.1 Materials

Unless otherwise noted, manipulations were performed under nitrogen atmosphere using standard Schlenk-type glassware in a dual-manifold Schlenk line. Unless otherwise stated, commercially available chemicals were used as received. **1** was synthesized according to the literature.<sup>1</sup> Toluene, tetrahydrofuran, dichloromethane, and *N,N*-dimethylformamide (DMF) were purchased from KANTO CHEMICAL Co., Inc., and further purified by passage through activated alumina under positive nitrogen pressure as described by Grubbs *et al.*<sup>2</sup>

### 1.2 Experimental equipment

*NMR spectroscopy*: <sup>1</sup>H NMR (500 MHz), <sup>13</sup>C {<sup>1</sup>H} NMR (126 MHz), and <sup>1</sup>H-<sup>1</sup>H ROESY NMR (500 MHz) spectra were measured with a Bruker AVANCE III HD 500. The <sup>1</sup>H NMR chemical shifts were reported relative to residual protonated solvents (7.26 ppm) in CDCl<sub>3</sub>. The <sup>13</sup>C NMR chemical shifts were reported relative to deuterated solvents (77.16 ppm) in CDCl<sub>3</sub>.

*High-Resolution Mass spectroscopy (HR-MS)*: Electrospray ionization time-of-flight (ESI-ToF) mass spectra were obtained using a Bruker micrOTOF II-KE02. The HR-MS spectra were internally calibrated using NaTFA clusters.

*Flash column chromatography*: Flash column chromatography was performed using Isolera One.

*Preparative recycling gel permeation chromatography (GPC)*: Preparative recycling GPC was performed with a SHIMADZU LC-20AP System equipped with Shodex K-4002L and Shodex K-4002.5L columns, a SHIMADZU SPD-20A and a SHIMADZU RID-10A, or a JAI LC9130 System equipped with JAIGEL-2.5H column, a JAI UV DETECTOR UV 370 NEXT and a JAI RI DETECTOR RI-700-NEXT using chloroform as the eluent at a flow rate of 14 mL min<sup>-1</sup>.

*Light Source*: LED irradiation experiments were conducted using a PhotoRedOx Box (HepatoChem, Inc.) equipped with Kessil PR 160L-427nm (40 W, maximum intensity).

*Absorption spectroscopy*: Absorption spectra were measured with a SHIMADZU UV-2600 spectrophotometer using DMF or CH<sub>2</sub>Cl<sub>2</sub> as the solvent under air atmosphere.

*Emission spectroscopy*: Emission spectra were measured with a Shimadzu RF-6000 fluorescence spectrophotometer using CH<sub>2</sub>Cl<sub>2</sub> as the solvent under N<sub>2</sub> atmosphere.

*Photoluminescence quantum yield measurement*: Absolute photoluminescence quantum yields

were measured with the HAMAMATSU Photonics C11347 Absolute PL quantum yields measurement system under N<sub>2</sub> atmosphere, using an integrating sphere to collect all the emitted light. For solution measurements, concentrations of  $1 \times 10^{-6}$  or  $1 \times 10^{-5}$  M CH<sub>2</sub>Cl<sub>2</sub> solutions were used. For the solid-state (film) measurements, films were prepared by drop-casting 100  $\mu$ L of  $1 \times 10^{-4}$  M CH<sub>2</sub>Cl<sub>2</sub> solutions of biscyclometalated iridium complexes onto quartz laboratory dishes and dried in vacuo at room temperature.

*Electrochemical cyclic voltammetry:* Electrochemical experiments were carried out with a CHI 620E electrochemical analyzer (CH Instruments Inc.) in a three-electrode system, with a Ag/Ag<sup>+</sup> (10 mM AgNO<sub>3</sub> in 0.1 M *n*Bu<sub>4</sub>NClO<sub>4</sub>-MeCN) reference electrode, a platinum wire as the counter electrode and a glassy carbon electrode as the working electrode.

## 2. Synthetic procedures and NMR spectra of L1–L3

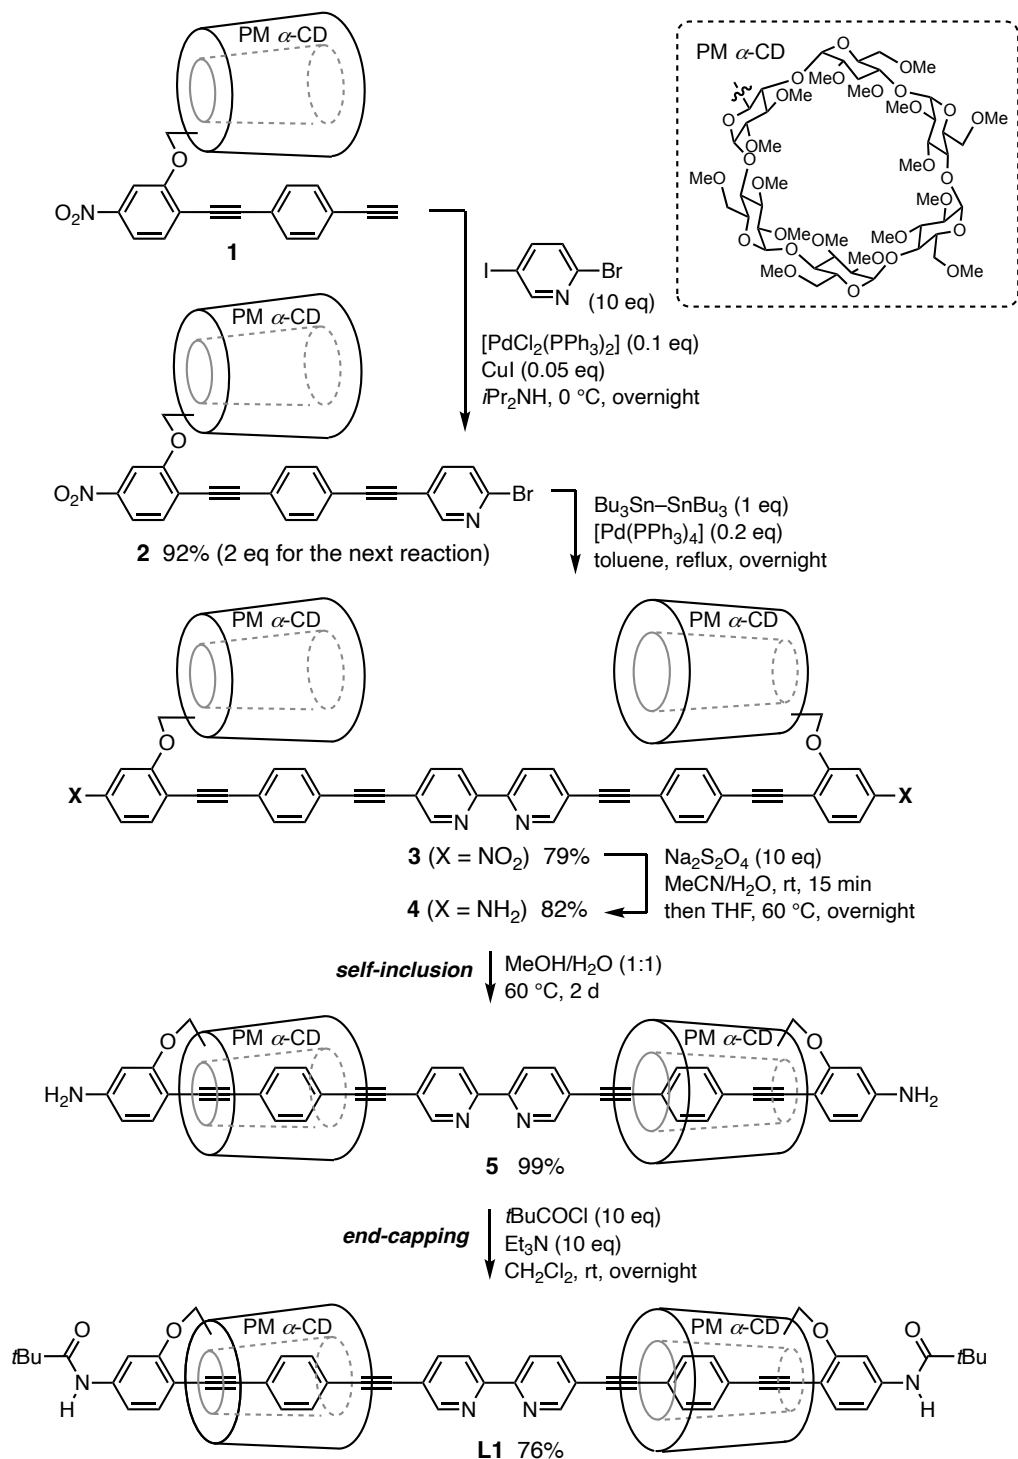

Scheme S1 Synthetic routes to **L1**

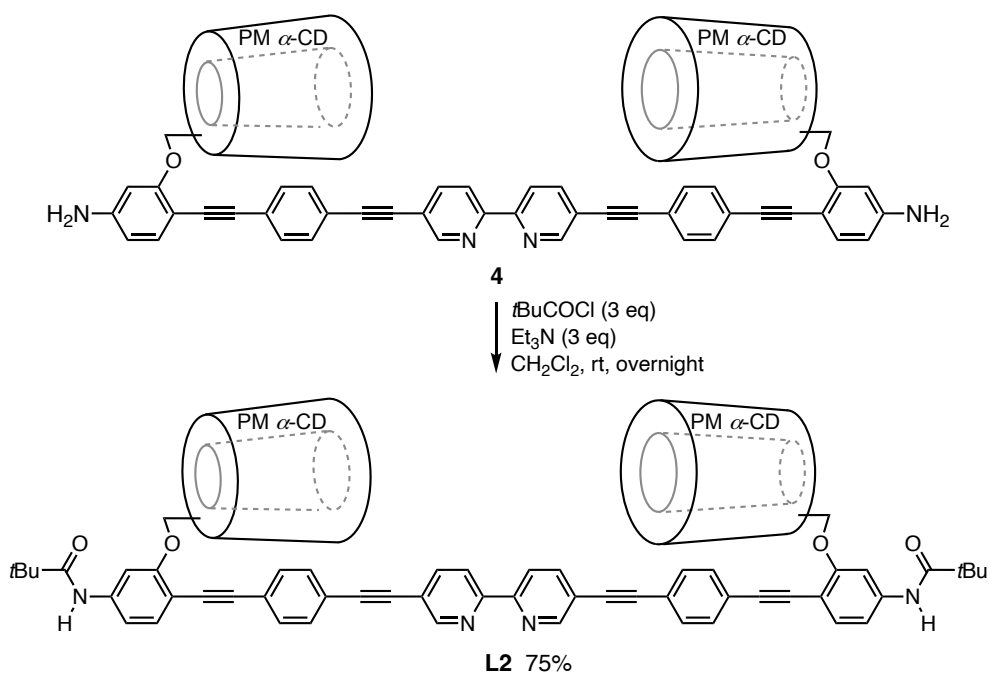

Scheme S2 Synthetic routes to **L2**

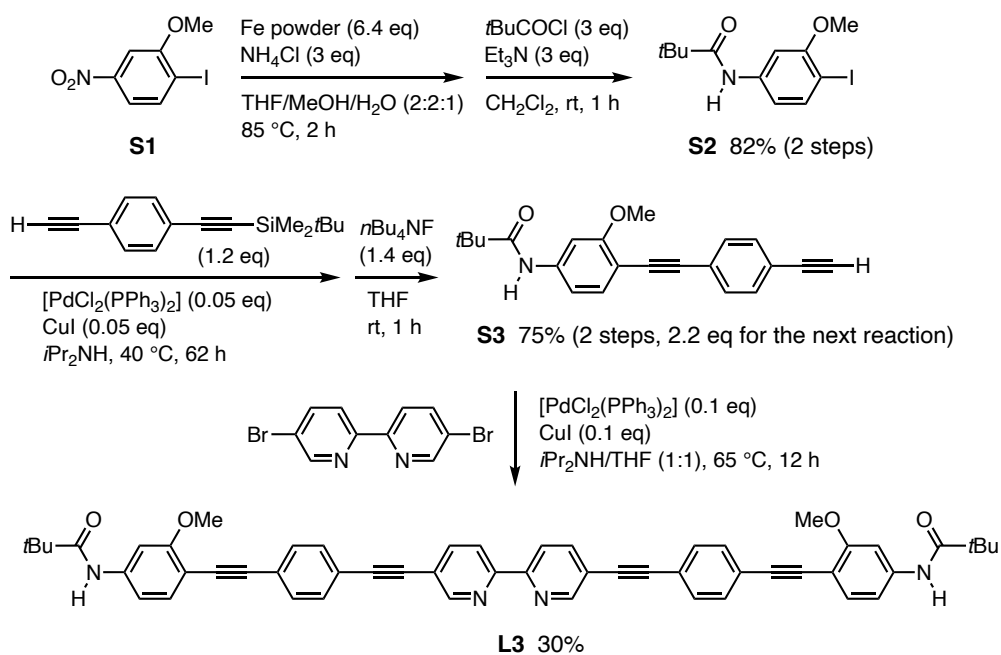

Scheme S3 Synthetic routes to **L3**

## 2.1 Synthesis and NMR spectra of compound 2

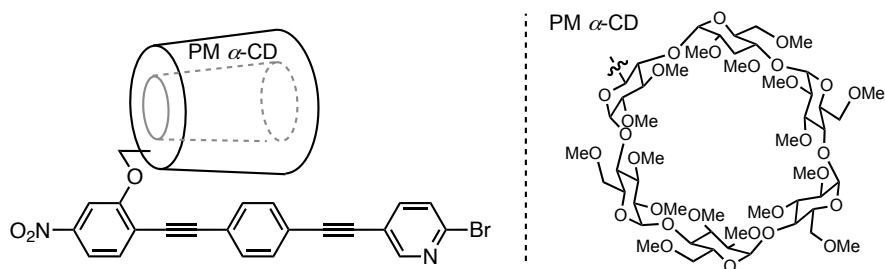

The mixture of **1** (1456.5 mg, 1 mmol), 2-bromo-5-iodopyridine (2838.9 mg, 10 mmol), PdCl<sub>2</sub>(PPh<sub>3</sub>)<sub>2</sub> (70.2 mg, 0.1 mmol) and CuI (9.5 mg, 50 μmol) in diisopropylamine (50 mL) was stirred overnight at 0 °C, and then the solvent was removed *in vacuo*. The residue was purified by flash column chromatography (hexane/50%→100% ethyl acetate, then ethyl acetate/0%→17% methanol) to give **2** as a pale yellow solid (1476.9 mg, 92%).

<sup>1</sup>H NMR (500 MHz, CDCl<sub>3</sub>): δ 8.52 (d, *J* = 2.3 Hz, 1H), 7.83 (dd, *J* = 8.4, 2.0 Hz, 1H), 7.78 (d, *J* = 2.0 Hz, 1H), 7.66–7.59 (m, 4H), 7.52–7.48 (m, 3H), 5.11–4.96 (m, 6H), 4.83 (dd, *J* = 10.2, 2.1 Hz, 1H), 4.31 (d, *J* = 10.0 Hz, 1H), 4.22 (t, *J* = 9.3 Hz, 1H), 4.09 (d, *J* = 9.4 Hz, 1H), 3.83–3.12 (m, 82H), 3.01 (dd, *J* = 9.9, 3.2 Hz, 1H).

<sup>13</sup>C NMR (126 MHz, CDCl<sub>3</sub>): δ 159.54, 152.49, 148.15, 141.53, 140.63, 133.36, 132.10, 131.83, 127.87, 123.13, 122.95, 119.80, 119.48, 116.10, 106.86, 100.54, 100.42, 100.32, 100.29, 100.24, 100.12, 98.06, 93.48, 87.15, 86.81, 82.87, 82.72, 82.65, 82.64 (peaks overlapped), 82.57, 82.35, 82.33, 82.28 (peaks overlapped), 82.10 (peaks overlapped), 81.32 (peaks overlapped), 81.29 (peaks overlapped), 81.26, 81.11, 71.86, 71.83, 71.66 (peaks overlapped), 71.63, 71.58, 71.45, 71.42, 71.40, 71.33, 70.39, 68.46, 62.04, 61.95 (peaks overlapped), 61.91, 61.89 (peaks overlapped), 59.44, 59.22 (peaks overlapped), 59.21, 59.01, 58.37, 58.03, 58.00, 57.95, 57.92, 57.48.

HR-MS (ESI-ToF-MS) *m/z*: [**2**+Na]<sup>+</sup> calcd for C<sub>74</sub>H<sub>103</sub>N<sub>2</sub>O<sub>32</sub>BrNa 1635.5556, found 1635.5549.

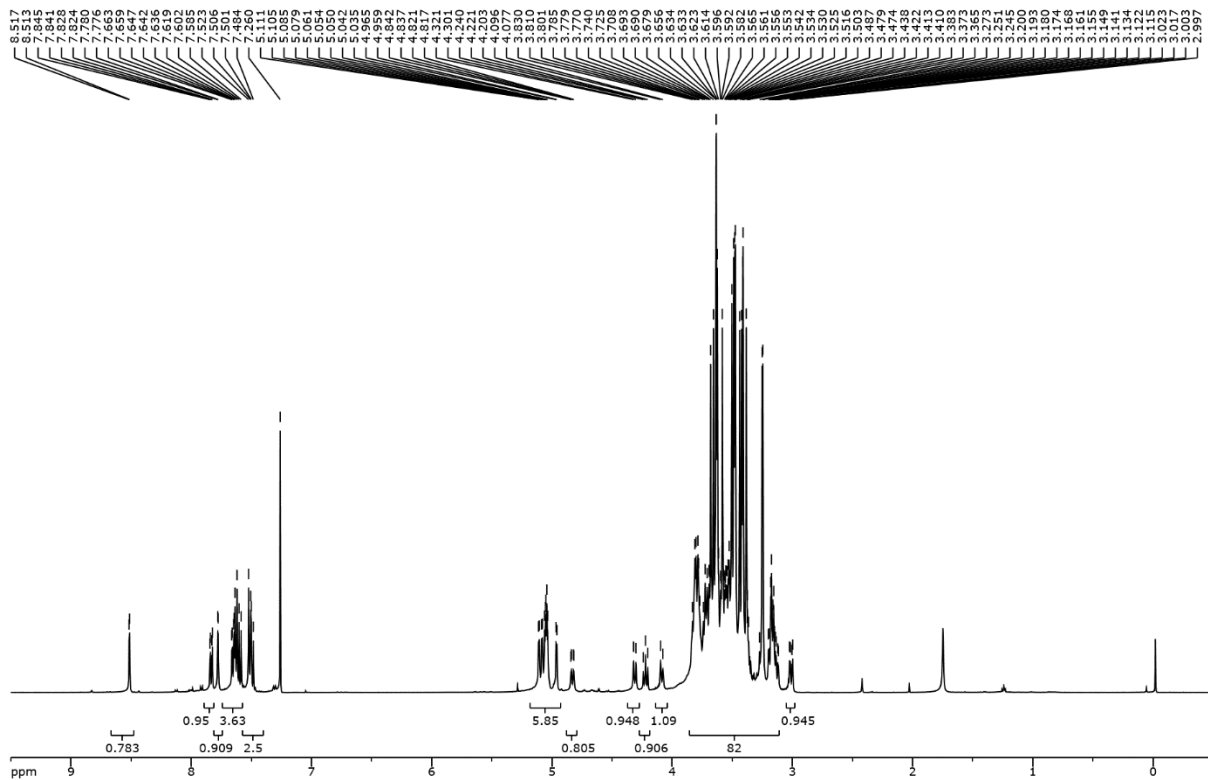

Fig. S1  $^1\text{H}$  NMR spectrum of compound **2** (500 MHz,  $\text{CDCl}_3$ ).

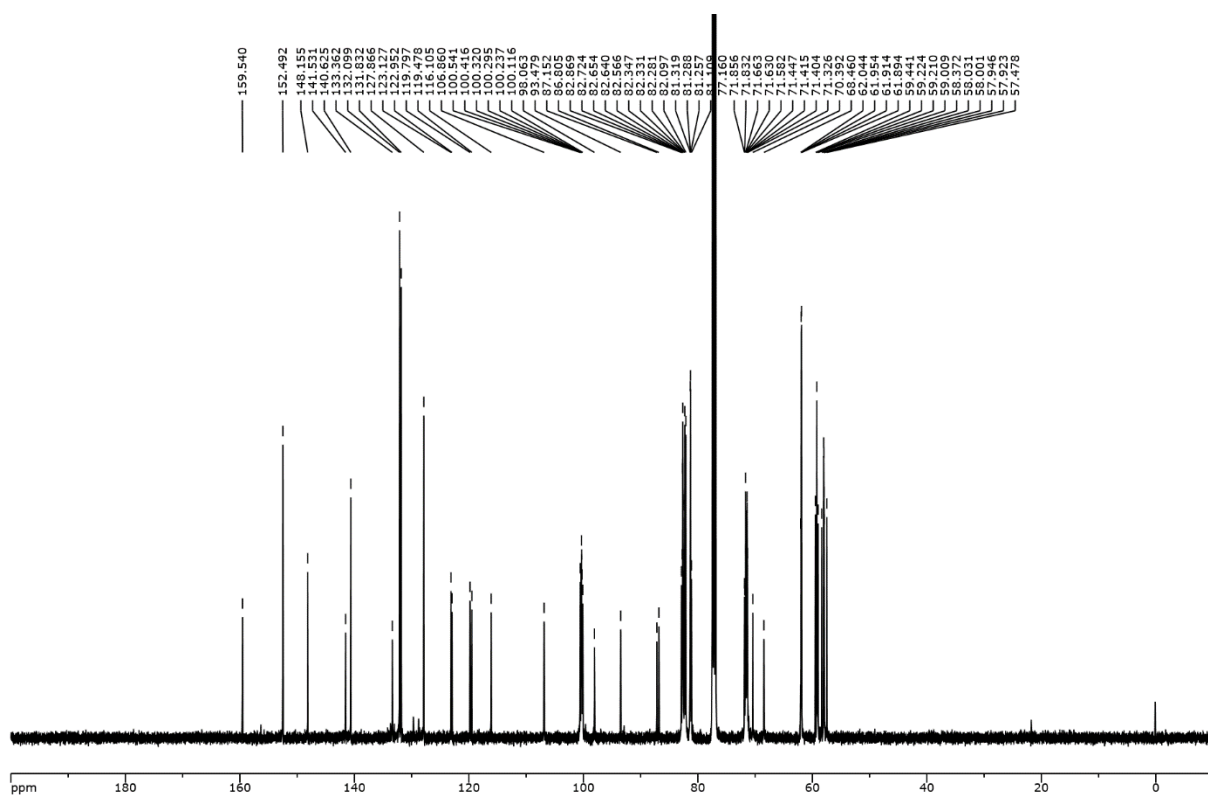

Fig. S2  $^{13}\text{C}$  NMR spectrum of compound **2** (126 MHz,  $\text{CDCl}_3$ ).



## 2.2 Synthesis and NMR spectra of compound 3

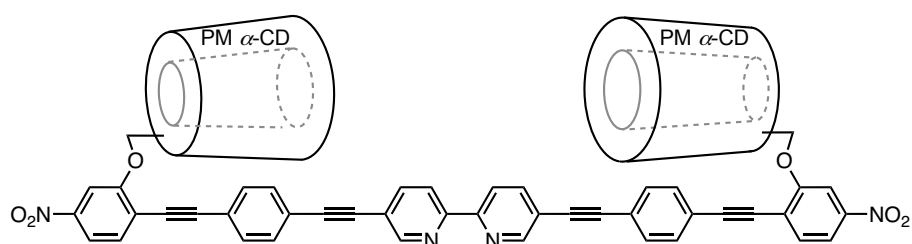

To a solution of **2** (1290.0 mg, 0.8 mmol) and Pd(PPh<sub>3</sub>)<sub>4</sub> (92.4 mg, 80 μmol) in toluene (40 mL), Sn<sub>2</sub>nBu<sub>6</sub> (200 μL, 0.4 mmol) was added at room temperature, and the mixture was refluxed (bath temp. 120 °C) overnight. After the reaction completed, the solvent was removed *in vacuo*. The residue was diluted with chloroform. The organic layer was washed with brine and NH<sub>3</sub> aq., dried over MgSO<sub>4</sub>, filtered, and evaporated *in vacuo*. The residue was purified by GPC with chloroform as the eluent to yield **3** as a pale yellow solid (968.8 mg, 79%).

<sup>1</sup>H NMR (500 MHz, CDCl<sub>3</sub>): δ 8.83 (s, 2H), 8.46 (d, *J* = 8.2 Hz, 2H), 7.96 (dd, *J* = 8.2, 1.8 Hz, 2H), 7.85 (dd, *J* = 8.4, 1.7 Hz, 2H), 7.79 (d, *J* = 1.5 Hz, 2H), 7.65 (d, *J* = 8.2 Hz, 4H), 7.61 (d, *J* = 8.4 Hz, 2H), 7.56 (d, *J* = 8.1 Hz, 4H), 5.13–4.97 (m, 12H), 4.84 (d, *J* = 8.7 Hz, 2H), 4.32 (d, *J* = 10.1 Hz, 2H), 4.24 (t, *J* = 9.2 Hz, 2H), 4.10 (d, *J* = 9.5 Hz, 2H), 3.84–3.13 (m, 16H), 3.03 (dd, *J* = 9.9, 3.0 Hz, 2H).

<sup>13</sup>C NMR (126 MHz, CDCl<sub>3</sub>): δ 159.55, 154.45, 151.89, 148.15, 139.55, 133.37, 132.12, 131.89, 123.38, 122.93, 120.84, 120.34, 119.89, 116.13, 106.87, 100.59, 100.44, 100.35, 100.32, 100.26, 100.15, 98.23, 93.46, 88.85, 86.75, 82.90, 82.75, 82.68, 82.66 (peaks overlapped), 82.60, 82.37, 82.35, 82.31 (peaks overlapped), 82.13 (peaks overlapped), 81.34 (peaks overlapped), 81.31 (peaks overlapped), 81.13, 71.88, 71.86, 71.68 (peaks overlapped), 71.65, 71.61, 71.47, 71.43 (peaks overlapped), 71.36, 70.42, 68.48, 62.07, 61.98 (peaks overlapped), 61.94, 61.92 (peaks overlapped), 59.46, 59.25 (peaks overlapped), 59.23, 59.03, 58.42, 58.05, 58.02, 57.96, 57.94, 57.51.

HR-MS (ESI-ToF-MS) *m/z*: [**3**+2Na]<sup>2+</sup> calcd for C<sub>148</sub>H<sub>206</sub>N<sub>4</sub>O<sub>64</sub>Na<sub>2</sub> 1555.1403, found 1555.1420.

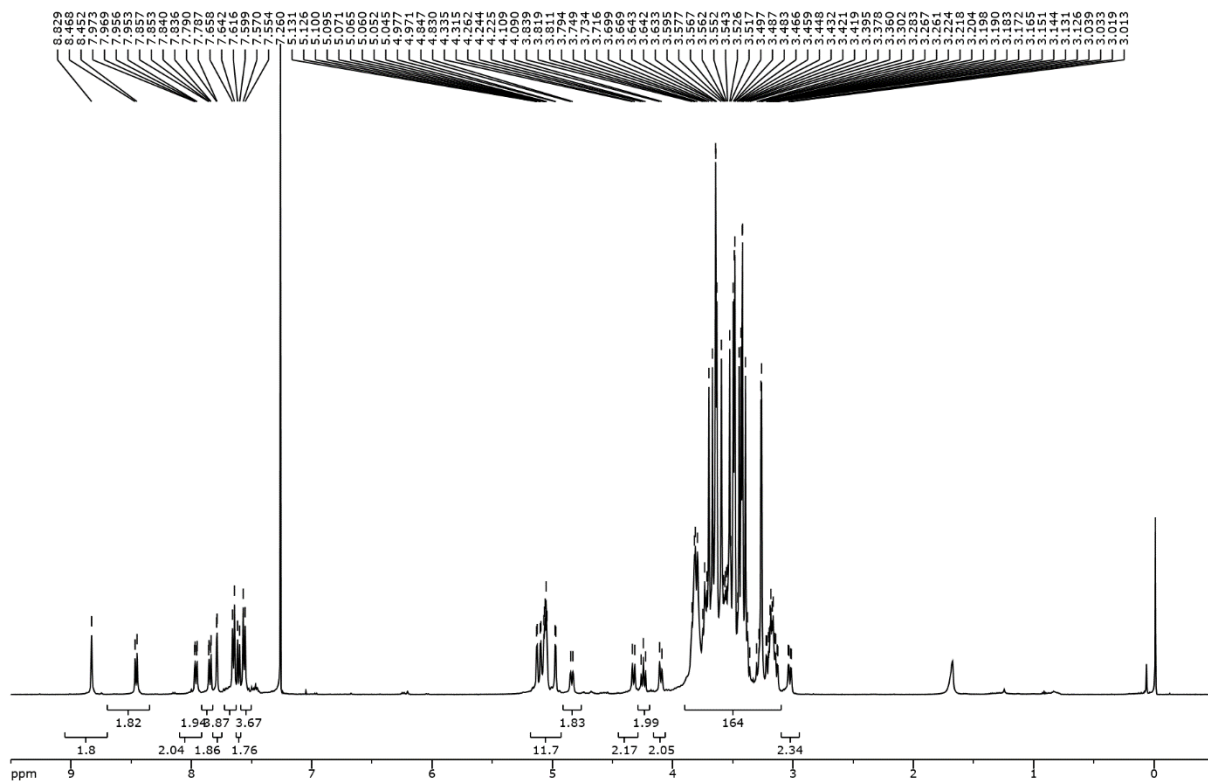

Fig. S3  $^1\text{H}$  NMR spectrum of compound **3** (500 MHz,  $\text{CDCl}_3$ ).

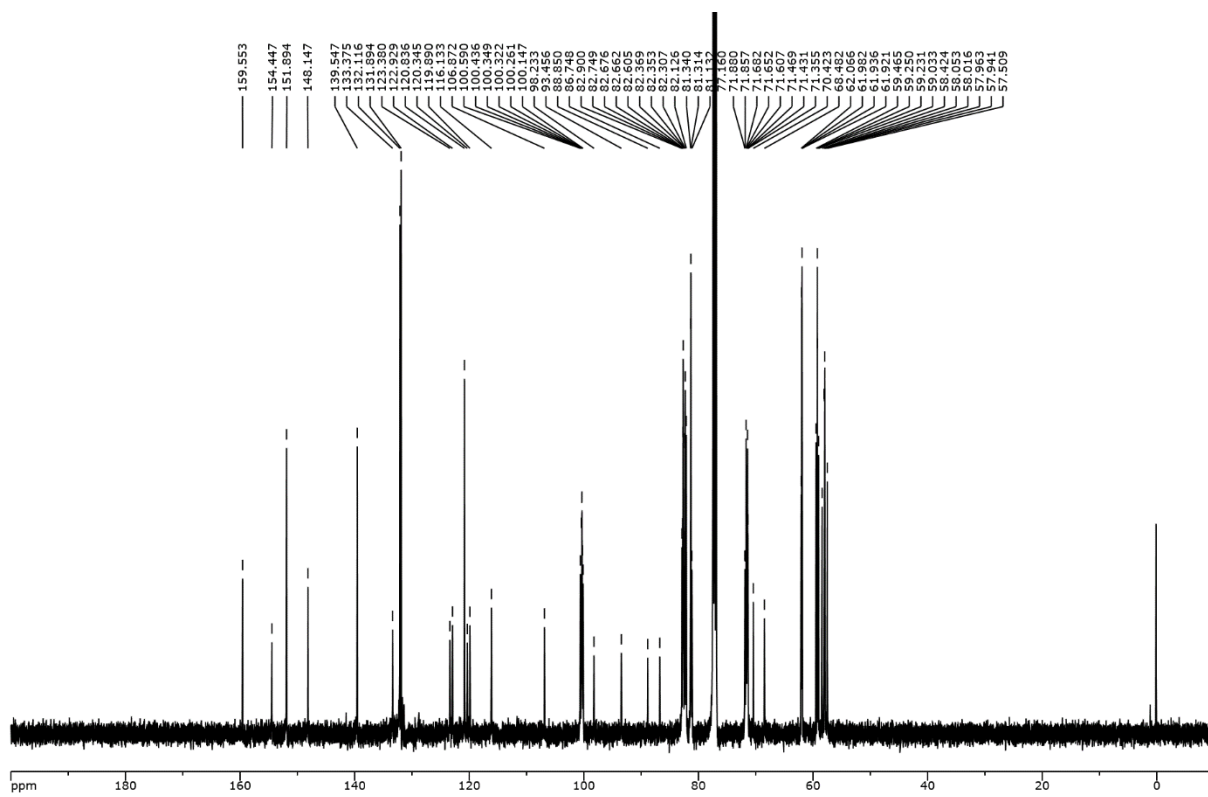

Fig. S4  $^{13}\text{C}$  NMR spectrum of compound **3** (126 MHz,  $\text{CDCl}_3$ ).

### 2.3 Synthesis and NMR spectra of compound 4

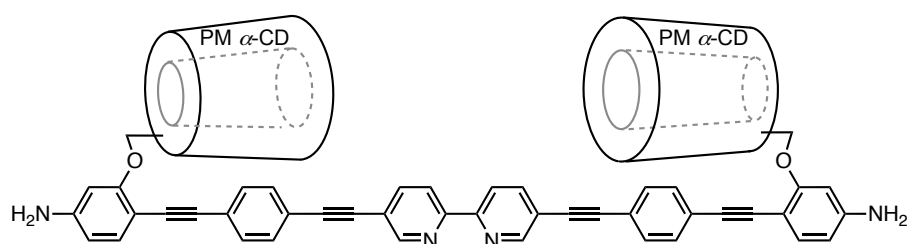

The mixture of **3** (153.3 mg, 50  $\mu\text{mol}$ ) and  $\text{Na}_2\text{S}_2\text{O}_4$  (87.1 mg, 0.5 mmol) in acetonitrile (5 mL) and  $\text{H}_2\text{O}$  (5 mL) was stirred at room temperature for 15 min. After the reaction completed, brine and ethyl acetate were added. The organic layer was dried over  $\text{MgSO}_4$ , filtered, and evaporated *in vacuo*. The residue was purified by GPC with chloroform as the eluent. The residue was dissolved in tetrahydrofuran (5 mL), and stirred overnight at 60  $^\circ\text{C}$ , and then the solvent was removed *in vacuo* to yield **4** as a pale yellow solid (123.3 mg, 82%).

$^1\text{H}$  NMR (500 MHz,  $\text{CDCl}_3$ ):  $\delta$  8.81 (s, 2H), 8.43 (d,  $J = 8.2$  Hz, 2H), 7.94 (dd,  $J = 8.3, 2.1$  Hz, 2H), 7.55 (d,  $J = 8.4$  Hz, 4H), 7.49 (d,  $J = 8.4$  Hz, 4H), 7.25 (d,  $J = 8.3$  Hz, 2H), 6.25–6.20 (m, 4H), 5.17–5.00 (m, 12H), 4.59 (dd,  $J = 10.6, 3.4$  Hz, 2H), 4.28 (d,  $J = 10.4$  Hz, 2H), 4.18 (t,  $J = 9.2$  Hz, 2H), 4.04 (dd,  $J = 9.6, 2.3$  Hz, 2H), 3.85–3.13 (m, 164H), 3.06 (dd,  $J = 9.9, 3.2$  Hz, 2H).

$^{13}\text{C}$  NMR (126 MHz,  $\text{CDCl}_3$ ):  $\delta$  160.80, 154.26, 151.81, 148.61, 139.43, 134.44, 131.64, 131.37, 125.04, 121.29, 120.76, 120.58, 107.67, 102.77, 100.56, 100.41, 100.33, 100.24, 100.22, 99.76, 99.40, 93.99, 91.55, 89.78, 87.89, 82.90, 82.76, 82.67, 82.66, 82.51, 82.43, 82.35 (peaks overlapped), 82.26 (peaks overlapped), 82.17, 81.36 (peaks overlapped), 81.31 (peaks overlapped), 81.24, 71.90, 71.74, 71.66, 71.60, 71.52 (peaks overlapped), 71.43, 71.39 (peaks overlapped), 70.61, 67.88, 62.01, 61.97, 61.94 (peaks overlapped), 61.87, 59.31, 59.19 (peaks overlapped), 59.15, 59.07, 58.38, 58.05, 58.04, 57.97, 57.94, 57.56.

HR-MS (ESI-ToF-MS)  $m/z$ :  $[\mathbf{4}+2\text{Na}]^{2+}$  calcd for  $\text{C}_{148}\text{H}_{210}\text{N}_4\text{O}_{60}\text{Na}_2$  1525.1661, found 1525.1642.

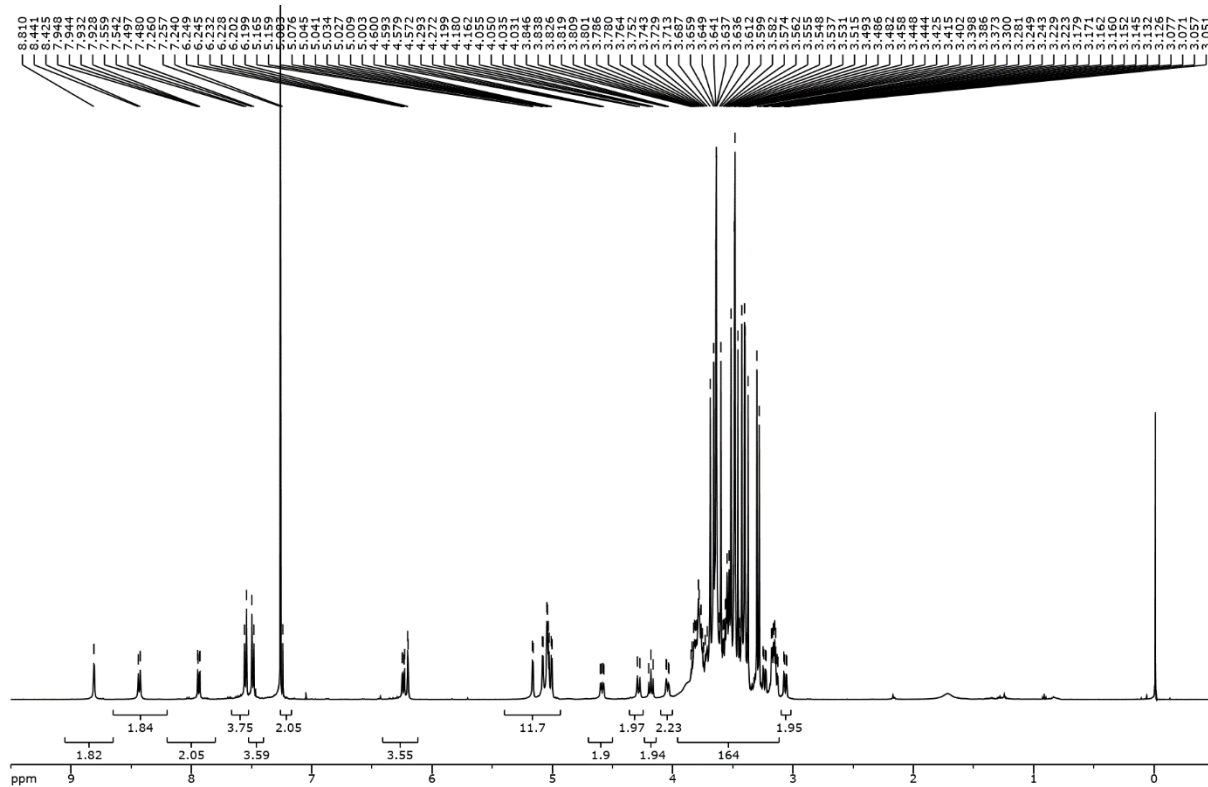

Fig. S5  $^1\text{H}$  NMR spectrum of compound **4** (500 MHz,  $\text{CDCl}_3$ ).

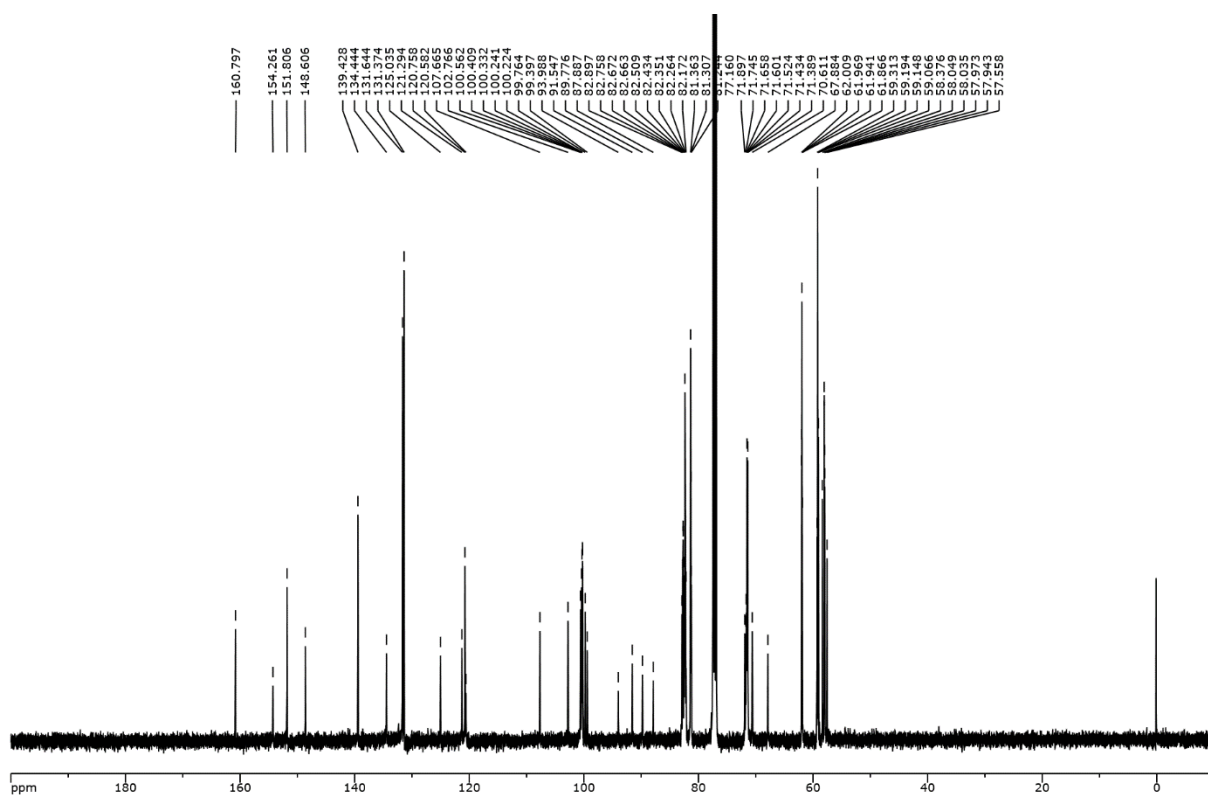

Fig. S6  $^{13}\text{C}$  NMR spectrum of compound **4** (126 MHz,  $\text{CDCl}_3$ ).

## 2.4 Synthesis and NMR spectra of compound 5

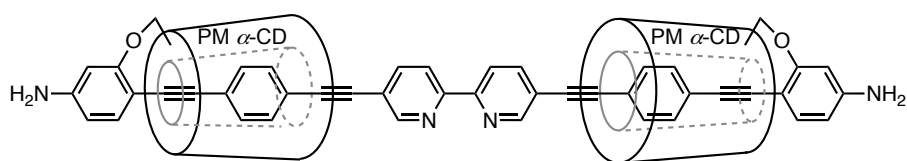

**4** (120.2 mg, 40  $\mu\text{mol}$ ) was dissolved in methanol (60 mL) and  $\text{H}_2\text{O}$  (60 mL). The mixture was stirred at 60  $^\circ\text{C}$  for 2 d, and then the solvent was removed *in vacuo* to yield **5** as a pale yellow solid (119.0 mg, 99%).

$^1\text{H}$  NMR (500 MHz,  $\text{CDCl}_3$ ):  $\delta$  8.72 (s, 2H), 8.41 (d,  $J = 8.2$  Hz, 2H), 8.02 (d,  $J = 8.1$  Hz, 4H), 7.87 (dd,  $J = 8.3, 1.7$  Hz, 2H), 7.61 (d,  $J = 8.1$  Hz, 4H), 7.21 (d,  $J = 7.9$  Hz, 2H), 6.44–6.42 (m, 4H), 5.09–4.95 (m, 12H), 4.83 (t,  $J = 8.6$  Hz, 2H), 4.36–4.32 (m, 4H), 4.18–3.04 (m, 166H), 2.86 (d,  $J = 10.1$  Hz, 2H).

$^{13}\text{C}$  NMR (126 MHz,  $\text{CDCl}_3$ ):  $\delta$  163.55, 154.26, 151.88, 149.02, 139.35, 134.38, 132.31, 131.44, 123.86, 122.34, 120.67, 120.41, 109.98, 108.11, 105.43, 100.88, 100.56, 100.30, 100.20, 100.07, 98.20, 93.37, 91.58, 90.22, 87.87, 83.96, 82.82, 82.70 (peaks overlapped), 82.61, 82.50, 82.31, 82.26 (peaks overlapped), 82.17, 82.13, 81.81, 81.59, 81.39 (peaks overlapped), 81.32, 81.28, 81.15, 76.26, 72.27, 71.96, 71.79, 71.63 (peaks overlapped), 71.31 (peaks overlapped), 71.20, 71.17, 70.83, 70.28, 62.09, 61.97 (peaks overlapped), 61.85 (peaks overlapped), 61.72, 59.17 (peaks overlapped), 59.04, 58.83, 58.82, 58.46, 58.11, 57.95, 57.83, 57.76, 57.61.

HR-MS (ESI-ToF-MS)  $m/z$ : [**5**+2Na] $^{2+}$  calcd for  $\text{C}_{148}\text{H}_{210}\text{N}_4\text{O}_{60}\text{Na}_2$  1525.1661, found 1525.1688.

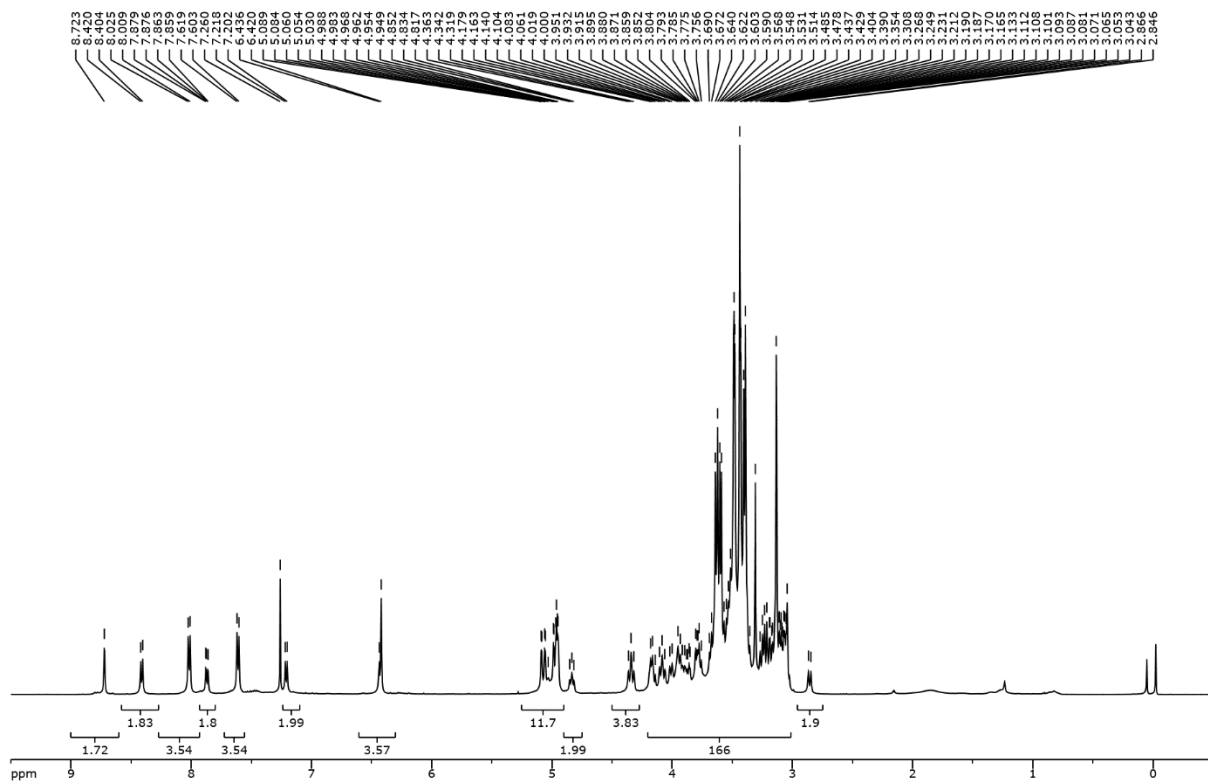

Fig. S7  $^1\text{H}$  NMR spectrum of compound **5** (500 MHz,  $\text{CDCl}_3$ ).

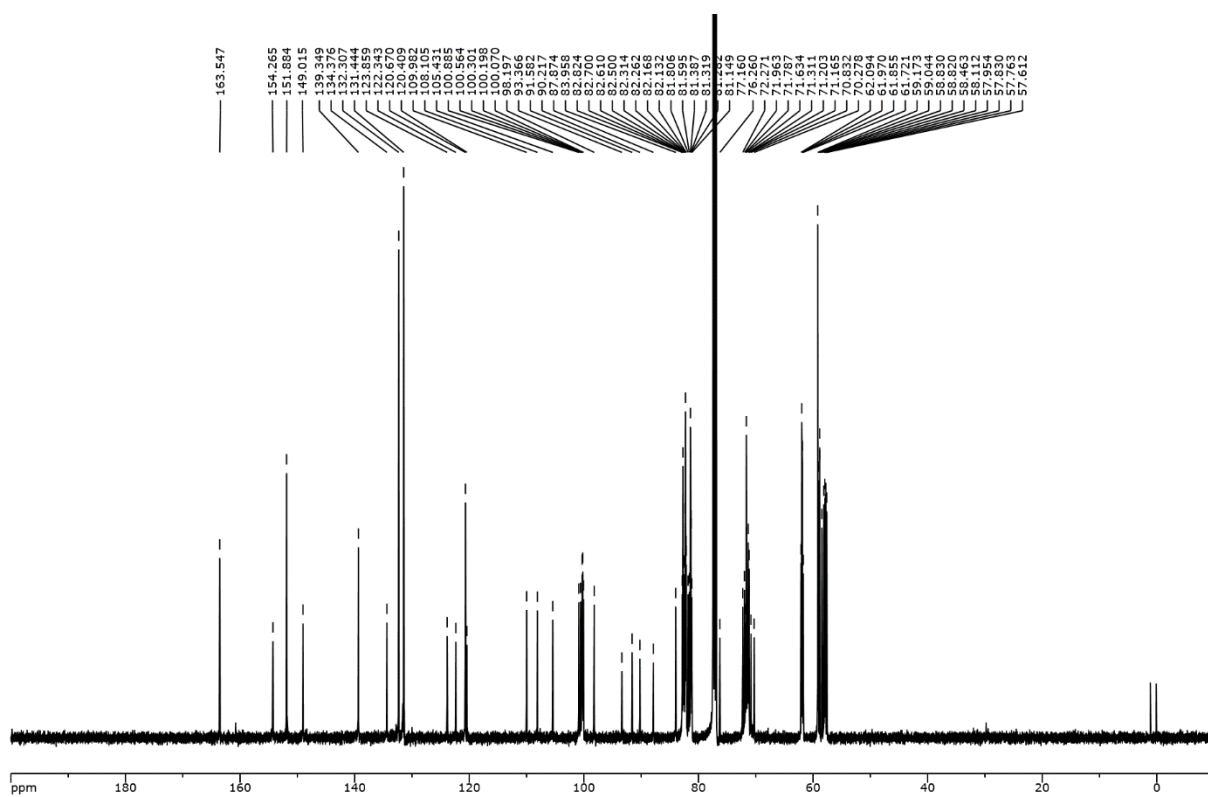

Fig. S8  $^{13}\text{C}$  NMR spectrum of compound **5** (126 MHz,  $\text{CDCl}_3$ ).

## 2.5 Synthesis and NMR spectra of compound L1

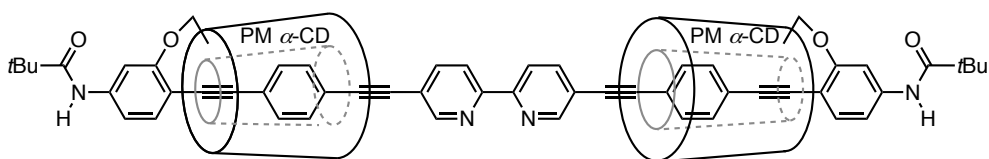

To a solution of **5** (90.2 mg, 30  $\mu\text{mol}$ ) in dichloromethane (3 mL), pivaloyl chloride (36.5  $\mu\text{L}$ , 0.3 mmol) and triethylamine (41.6  $\mu\text{L}$ , 0.3 mmol) were added, and then the mixture was stirred overnight at room temperature. After the reaction completed, the solvent was removed *in vacuo*. The residue was purified by GPC with chloroform as the eluent to yield **L1** as a pale yellow solid (72.8 mg, 76%).

$^1\text{H}$  NMR (500 MHz,  $\text{CDCl}_3$ ):  $\delta$  8.73 (s, 2H), 8.42 (d,  $J = 8.2$  Hz, 2H), 8.07 (d,  $J = 6.7$  Hz, 4H), 7.88 (d,  $J = 8.2$  Hz, 2H), 7.64 (d,  $J = 6.7$  Hz, 4H), 7.43–7.39 (m, 8H), 5.08–4.96 (m, 12H), 4.80 (t,  $J = 8.1$  Hz, 2H), 4.40 (d,  $J = 11.5$  Hz, 2H), 4.25–4.17 (m, 6H), 4.08–4.04 (m, 4H), 3.99 (d,  $J = 9.6$  Hz, 2H), 3.91–3.74 (m, 12H), 3.67–3.07 (m, 144H), 2.81 (d,  $J = 10.7$  Hz, 2H), 1.32 (s, 18H).

$^{13}\text{C}$  NMR (126 MHz,  $\text{CDCl}_3$ ):  $\delta$  176.90, 162.74, 154.34, 151.93, 140.22, 139.42, 133.60, 132.63, 131.53, 123.17, 123.02, 120.72, 120.35, 114.47, 113.06, 111.84, 100.87, 100.60, 100.32, 100.23, 100.07, 98.23, 93.18, 93.06, 89.08, 88.20, 83.96, 82.89, 82.75, 82.64, 82.63, 82.52, 82.40, 82.27, 82.25, 82.13, 82.09, 81.69, 81.60, 81.40, 81.37, 81.34 (peaks overlapped), 81.19, 72.54, 72.04, 71.84, 71.71, 71.66, 71.45, 71.34, 71.28 (peaks overlapped), 70.75, 70.28, 62.06, 61.96 (peaks overlapped), 61.85 (peaks overlapped), 61.71, 59.26, 59.23, 59.05, 58.92, 58.89, 58.47, 58.18, 57.99, 57.84 (peaks overlapped), 57.68, 40.01, 27.69.

HR-MS (ESI-ToF-MS)  $m/z$ : [**L1**+2Na] $^{2+}$  calcd for  $\text{C}_{158}\text{H}_{226}\text{N}_4\text{O}_{62}\text{Na}_2$  1609.2236, found 1609.2218.

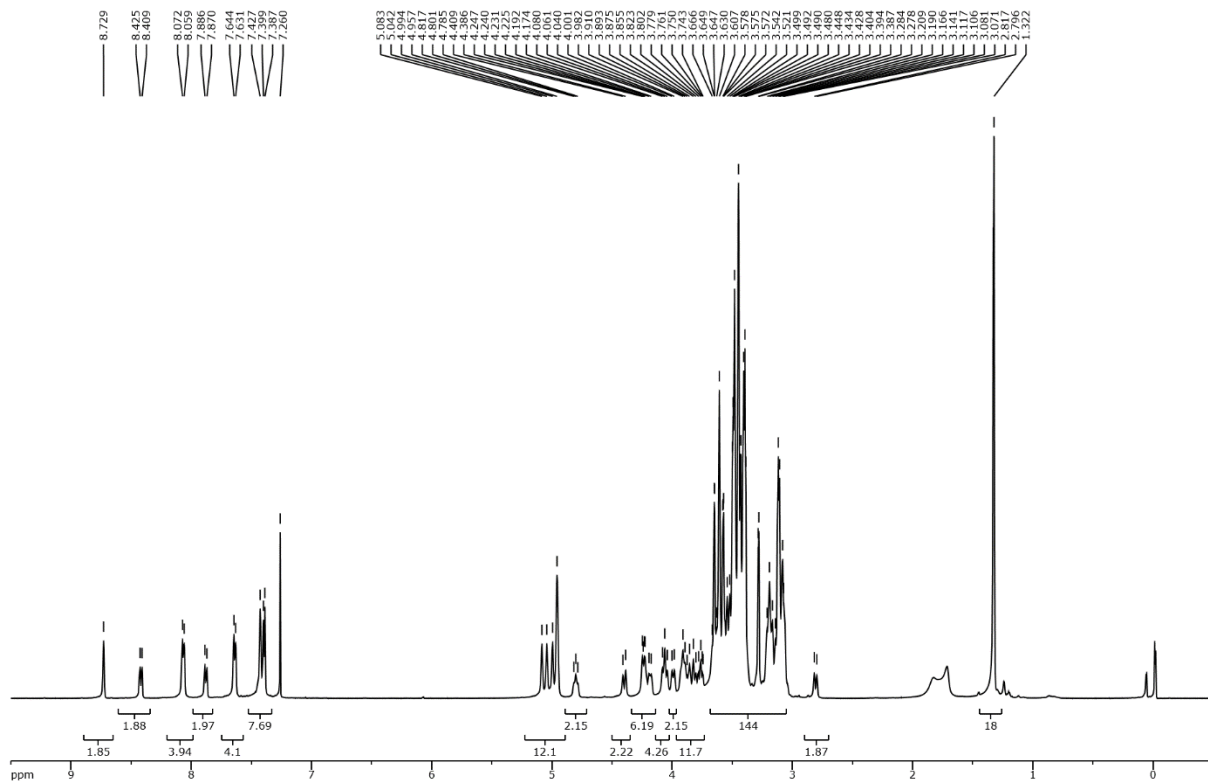

Fig. S9  $^1\text{H}$  NMR spectrum of compound **L1** (500 MHz,  $\text{CDCl}_3$ ).

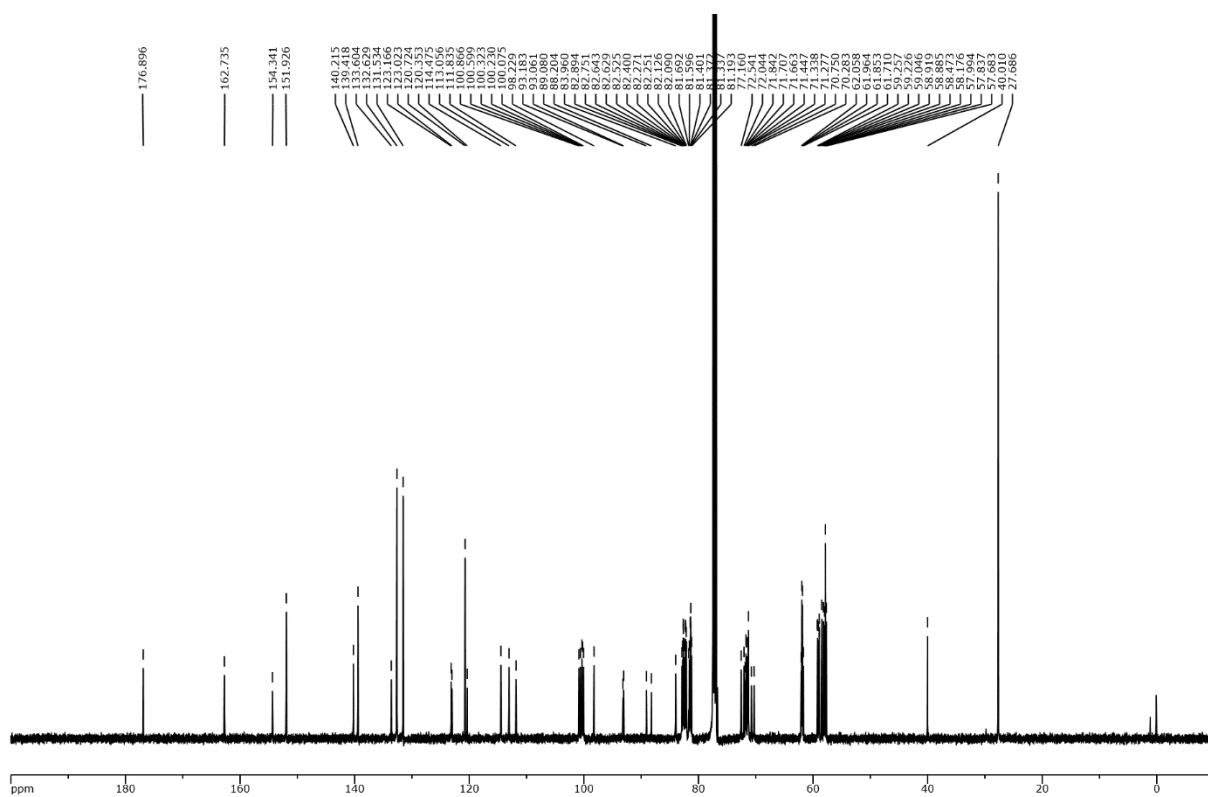

Fig. S10  $^{13}\text{C}$  NMR spectrum of compound **L1** (126 MHz,  $\text{CDCl}_3$ ).



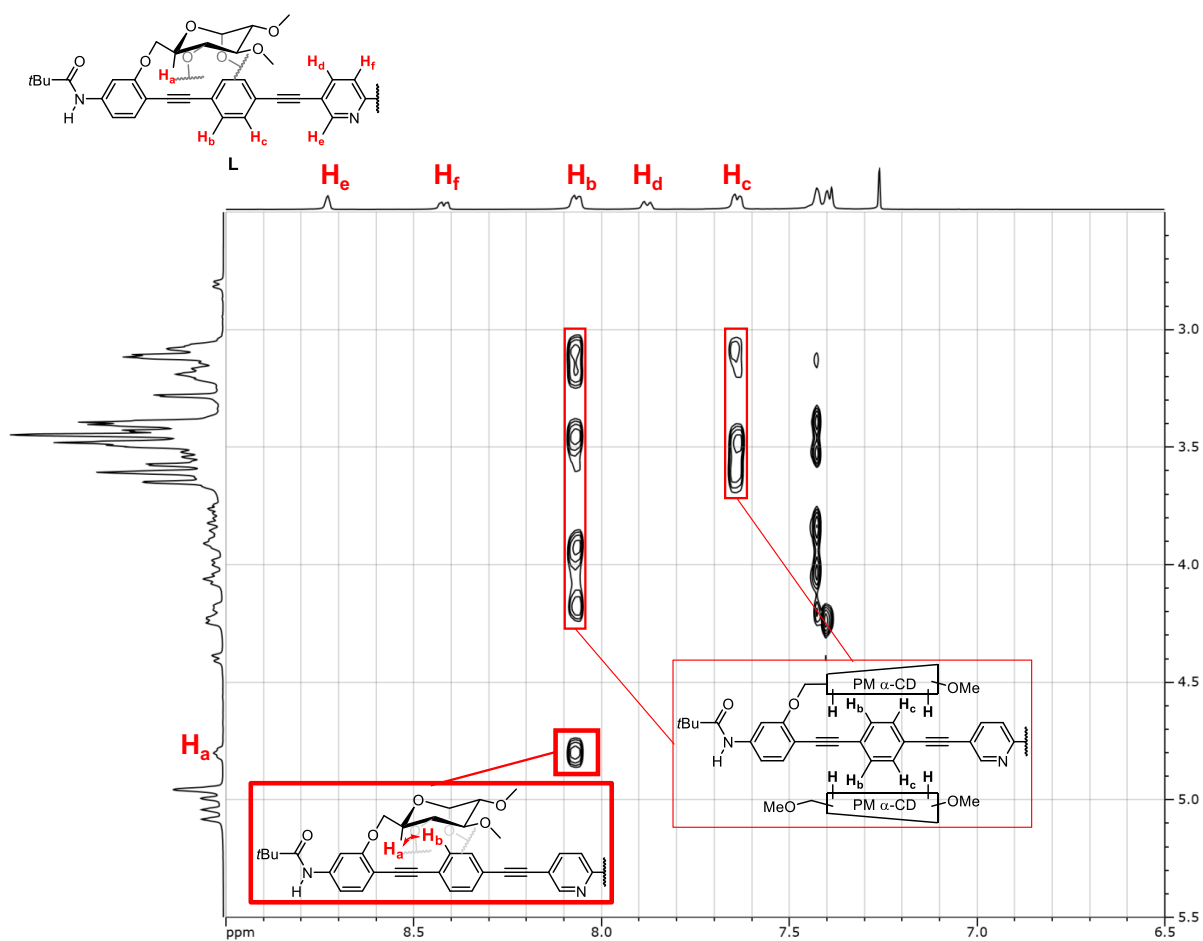

Fig. S11 Partial  $^1\text{H}$ - $^1\text{H}$  ROESY spectrum of compound **L1** (500 MHz,  $\text{CDCl}_3$ ).

## 2.6 Synthesis and NMR spectra of compound L2

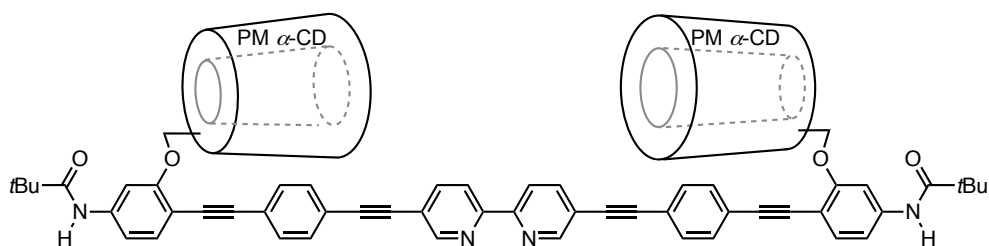

To a solution of **4** (90.2 mg, 30  $\mu$ mol) in dichloromethane (3 mL), pivaloyl chloride (11.0  $\mu$ L, 90  $\mu$ mol) and triethylamine (12.5  $\mu$ L, 90  $\mu$ mol) were added, and then the mixture was stirred overnight at room temperature. After the reaction completed, the solvent was removed *in vacuo*. The residue was purified by GPC with chloroform as the eluent to yield **L2** as a pale yellow solid (71.2 mg, 75%).

$^1\text{H}$  NMR (500 MHz,  $\text{CDCl}_3$ ):  $\delta$  8.81 (s, 2H), 8.44 (d,  $J = 8.2$  Hz, 2H), 7.99 (s, 2H), 7.94 (d,  $J = 8.3$  Hz, 2H), 7.59 (d,  $J = 7.8$  Hz, 4H), 7.51 (d,  $J = 7.9$  Hz, 4H), 7.40–7.37 (m, 4H), 6.55 (d,  $J = 8.3$  Hz, 2H), 5.19–5.00 (m, 12H), 4.56 (d,  $J = 10.0$  Hz, 2H), 4.35 (t,  $J = 9.2$  Hz, 2H), 4.29 (d,  $J = 10.0$  Hz, 2H), 4.02 (d,  $J = 9.7$  Hz, 2H), 3.92 (d,  $J = 9.8$  Hz, 2H), 3.86–3.12 (m, 162H), 3.03 (d,  $J = 6.4$  Hz, 2H), 1.30 (s, 18H).

$^{13}\text{C}$  NMR (126 MHz,  $\text{CDCl}_3$ ):  $\delta$  176.76, 160.19, 154.31, 151.83, 139.84, 139.47, 133.28, 131.73, 131.63, 124.34, 121.94, 120.78, 120.52, 110.99, 108.23, 103.75, 100.54, 100.47, 100.31 (peaks overlapped), 100.25, 100.01, 93.83, 92.99, 88.68, 88.13, 82.59, 82.56, 82.45, 82.38 (peaks overlapped), 82.32, 82.27 (peaks overlapped), 82.09, 81.82, 81.44, 81.40 (peaks overlapped), 81.35 (peaks overlapped), 81.19, 71.58, 71.49 (peaks overlapped), 71.47, 71.37 (peaks overlapped), 71.34, 71.08, 70.70 (peaks overlapped), 67.63, 62.01, 61.99, 61.95, 61.94, 61.89, 61.88, 59.43, 59.24, 59.18 (peaks overlapped), 58.77, 58.35, 58.04, 57.91 (peaks overlapped), 57.39, 39.97, 27.66.

HR-MS (ESI-ToF-MS)  $m/z$ : [**L2**+2Na] $^{2+}$  calcd for  $\text{C}_{158}\text{H}_{226}\text{N}_4\text{O}_{62}\text{Na}_2$  1609.2236, found 1609.2210.

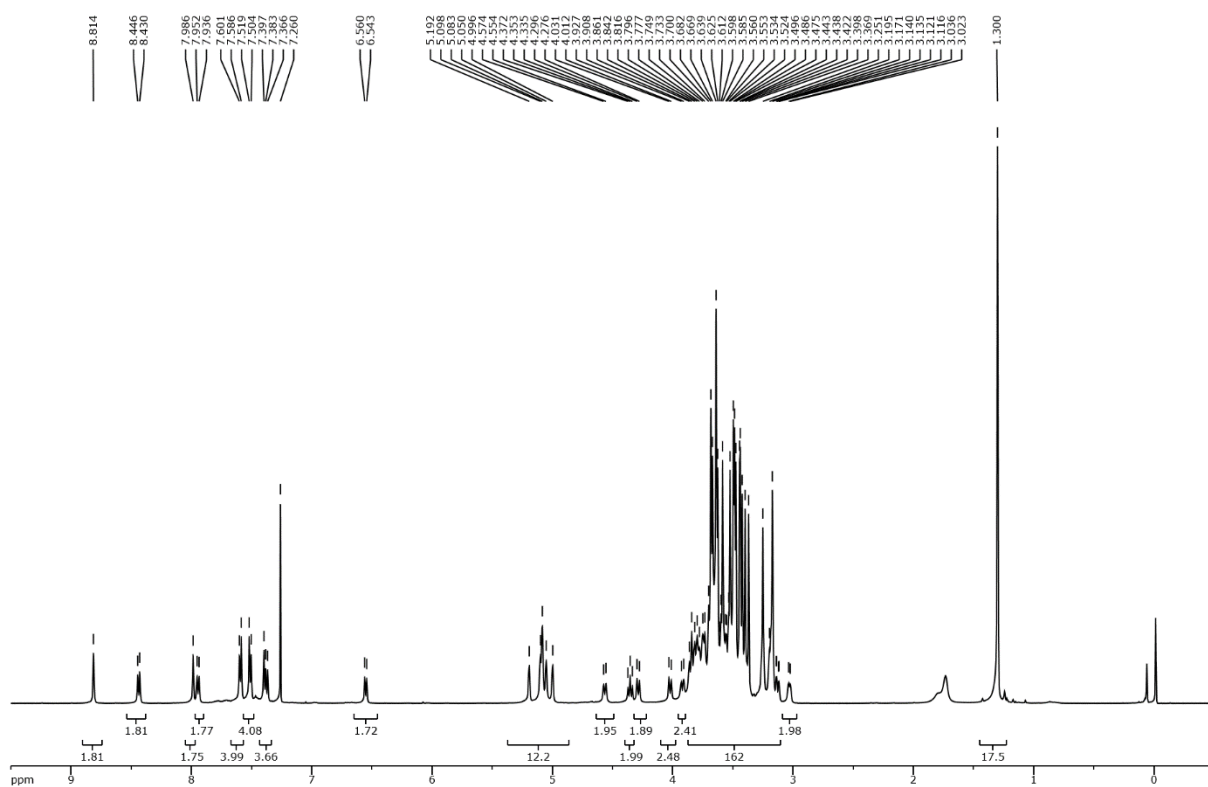

Fig. S12  $^1\text{H}$  NMR spectrum of compound **L2** (500 MHz,  $\text{CDCl}_3$ ).

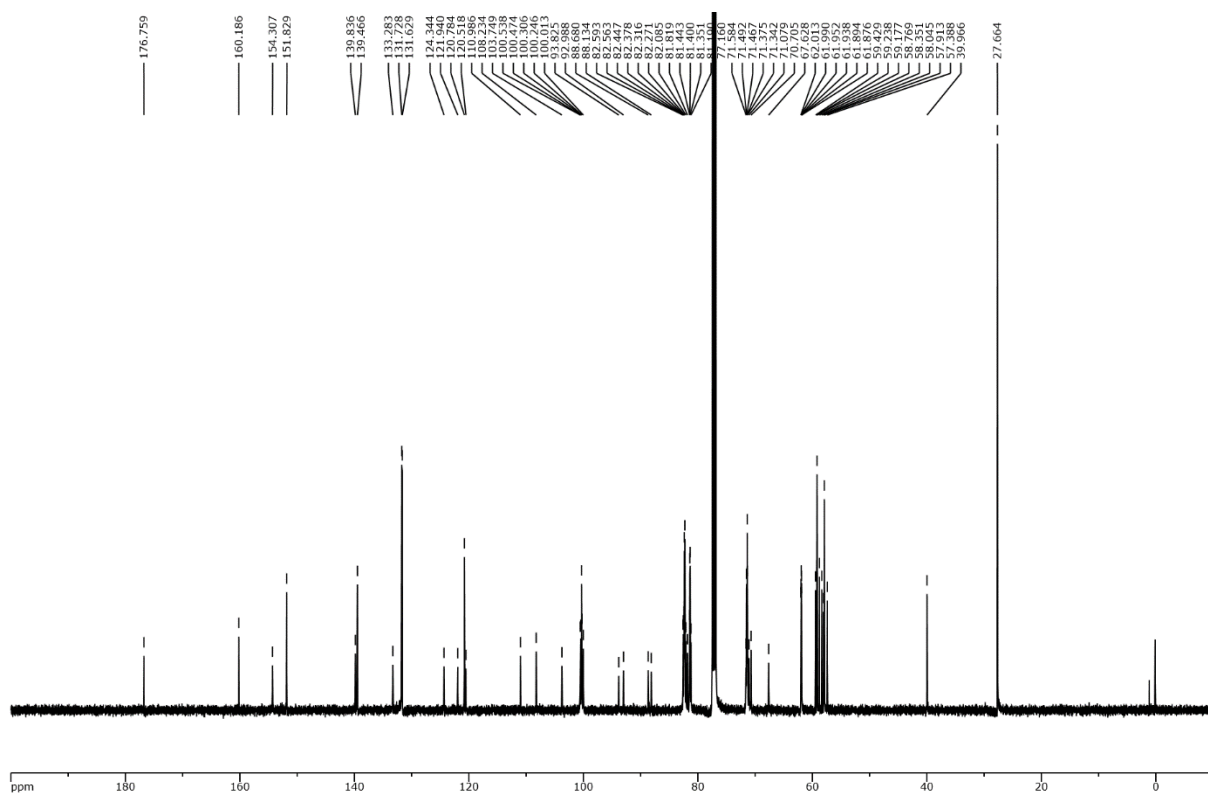

Fig. S13  $^{13}\text{C}$  NMR spectrum of compound **L2** (126 MHz,  $\text{CDCl}_3$ ).

## 2.7 Synthesis and NMR spectra of compound S2

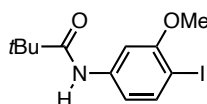

The mixture of 1-iodo-2-methoxy-4-nitrobenzene (**S1**, 697.6 mg, 2.5 mmol), NH<sub>4</sub>Cl (401 mg, 7.5 mmol) and Fe powder (893 mg, 16 mmol) in THF (14 mL), MeOH (14 mL) and H<sub>2</sub>O (7 mL) was stirred at 85 °C for 2 h. After cooling to room temperature, the mixture was diluted with EtOAc. The organic layer was washed with NH<sub>4</sub>Cl aq., dried over MgSO<sub>4</sub>, filtrated, and evaporated *in vacuo*. This crude product (4-iodo-3-methoxyaniline) was used for the next step without further purification.

To a solution of the crude product in dichloromethane (5 mL), pivaloyl chloride (924 μL, 7.5 mmol) and triethylamine (1.0 mL, 7.5 mmol) were added. The resulting mixture was stirred for 1 h at room temperature. After the reaction completed, the mixture was diluted with CH<sub>2</sub>Cl<sub>2</sub>. The organic layer was washed with 1N HCl and NaHCO<sub>3</sub> aq., dried over MgSO<sub>4</sub>, filtrated, and evaporated *in vacuo* to yield **S2** as a pale brown solid (679.3 mg, 82% for 2 steps).

<sup>1</sup>H NMR (500 MHz, CDCl<sub>3</sub>): δ 7.59 (d, *J* = 8.5 Hz, 1H), 7.54 (s, 1H), 7.47 (s, 1H), 6.63 (d, *J* = 8.5 Hz, 1H), 3.84 (s, 3H), 1.29 (s, 9H).

<sup>13</sup>C NMR (126 MHz, CDCl<sub>3</sub>): δ 176.97, 158.01, 139.88, 138.87, 113.48, 103.51, 78.81, 56.39, 39.86, 27.62.

HR-MS (ESI-ToF-MS) *m/z*: [**S2**+Na]<sup>+</sup> calcd for C<sub>12</sub>H<sub>16</sub>INO<sub>2</sub>Na 356.01179, found 356.01169.

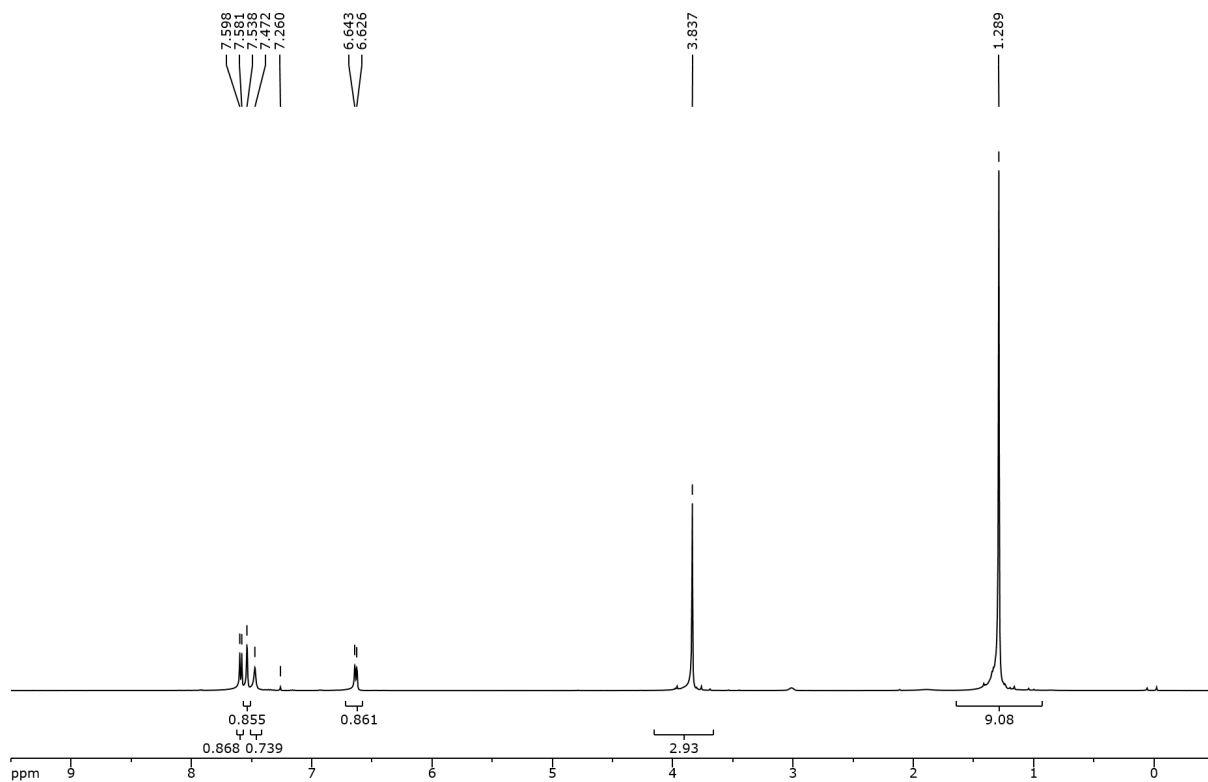

Fig. S14  $^1\text{H}$  NMR spectrum of compound **S2** (500 MHz,  $\text{CDCl}_3$ ).

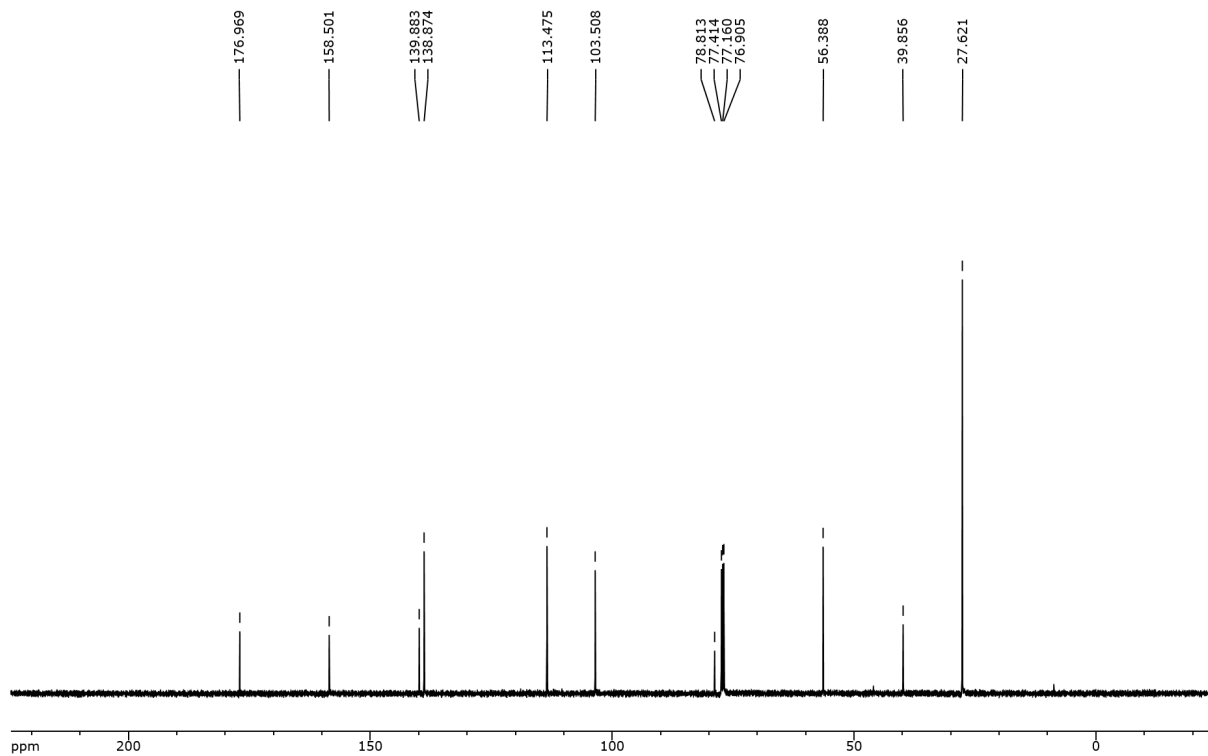

Fig. S15  $^{13}\text{C}$  NMR spectrum of compound **S2** (126 MHz,  $\text{CDCl}_3$ ).

## 2.8 Synthesis and NMR spectra of compound S3

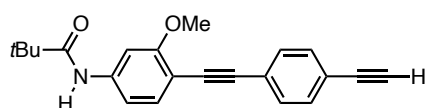

The mixture of **S2** (466 mg, 1.4 mmol), *tert*-butyl((4-ethynylphenyl)ethynyl)dimethylsilane<sup>1</sup> (395 mg, 1.64 mmol), PdCl<sub>2</sub>(PPh<sub>3</sub>)<sub>2</sub> (49.1 mg, 0.07 mmol) and CuI (13.3 mg, 0.07 mmol) in diisopropylamine (10 mL) was stirred at 40 °C for 62 h. After cooling to room temperature, the mixture was diluted with CH<sub>2</sub>Cl<sub>2</sub>. The organic layer was washed with 1N HCl aq. and brine, dried over MgSO<sub>4</sub>, filtrated, and evaporated *in vacuo*. The residue was roughly purified by flash column chromatography (hexane/10%→33% ethyl acetate). The crude product was used for the next reaction without further purification.

To a solution of the crude product in THF (5 mL), *n*Bu<sub>4</sub>NF (1 M in THF, 2 mL, 2.0 mmol) was added. The resulting mixture was stirred for 1 h at room temperature. After the reaction completed, the mixture was diluted with Et<sub>2</sub>O. The organic layer was washed with NH<sub>4</sub>Cl aq., dried over MgSO<sub>4</sub>, filtrated, and evaporated *in vacuo*. The residue was purified by flash column chromatography (hexane/ethyl acetate/CHCl<sub>3</sub> 5:1:1 to 2:1:1) to give **S3** as a pale yellow solid (348 mg, 75% for 2 steps).

<sup>1</sup>H NMR (500 MHz, CDCl<sub>3</sub>): δ 7.69 (d, *J* = 2.0 Hz, 1H), 7.50–7.43 (m, 4H), 7.40 (d, *J* = 8.5 Hz, 1H), 7.37 (s, 1H), 6.77 (dd, *J* = 8.0, 2.0 Hz, 1H), 3.94 (s, 3H), 3.16 (s, 1H), 1.33 (s, 9H).

<sup>13</sup>C NMR (126 MHz, CDCl<sub>3</sub>): δ 176.93, 160.77, 140.05, 133.68, 132.06, 131.50, 124.29, 121.58, 111.23, 107.59, 102.72, 92.48, 87.95, 83.52, 78.86, 56.03, 39.95, 27.67.

HR-MS (ESI-ToF-MS) *m/z*: [**S3**+Na]<sup>+</sup> calcd for C<sub>22</sub>H<sub>21</sub>NO<sub>2</sub>Na 354.14645, found 354.14535.

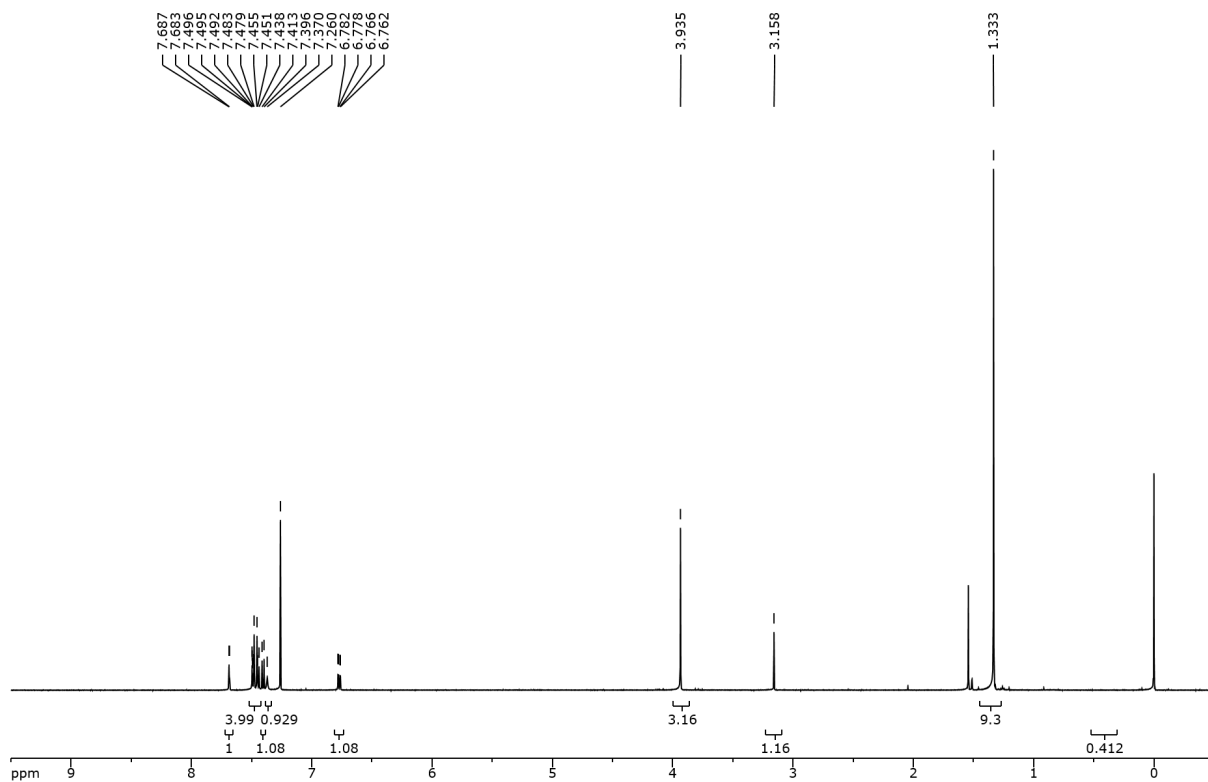

Fig. S16  $^1\text{H}$  NMR spectrum of compound **S3** (500 MHz,  $\text{CDCl}_3$ ).

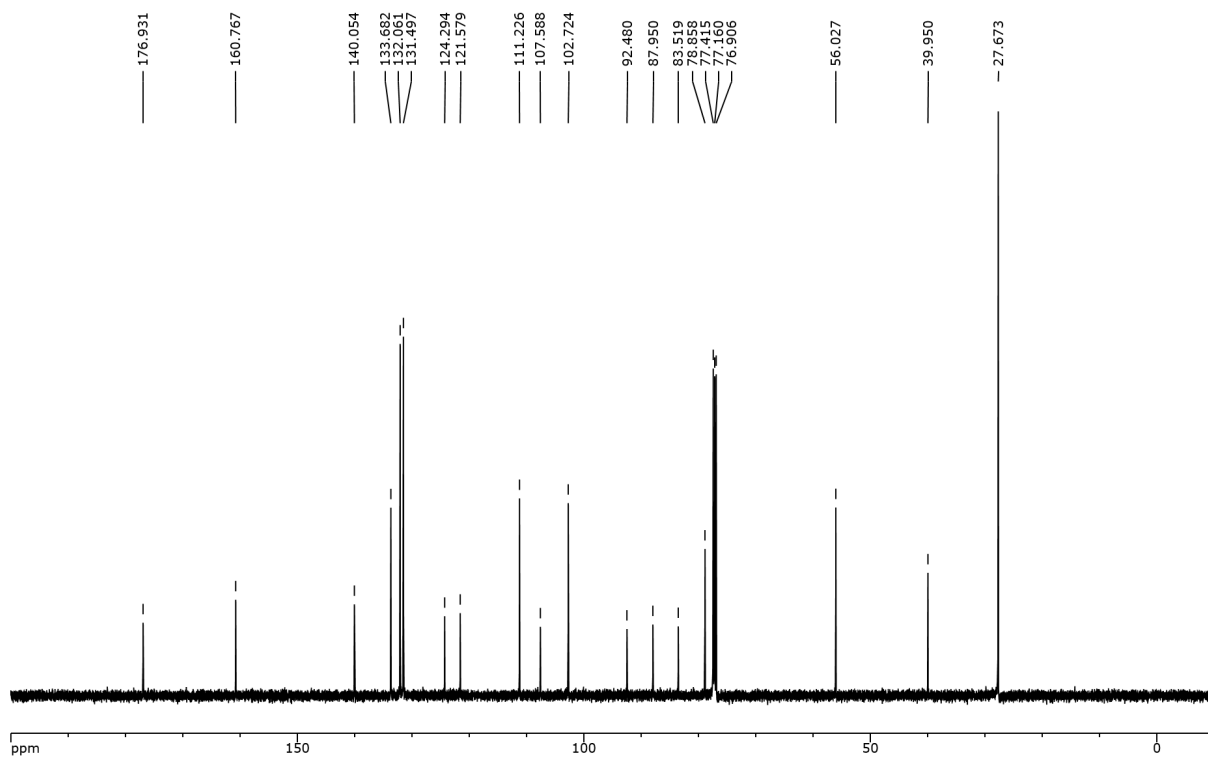

Fig. S17  $^{13}\text{C}$  NMR spectrum of compound **S3** (126 MHz,  $\text{CDCl}_3$ ).

## 2.9 Synthesis and NMR spectra of compound L3

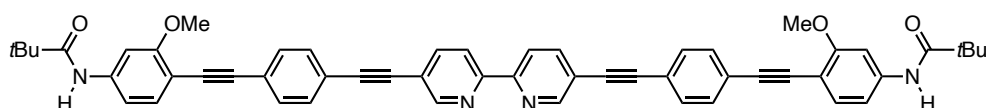

The mixture of **S3** (218.7 mg, 0.66 mmol), 5,5'-dibromo-2,2'-bipyridine (94.2 mg, 0.30 mmol), PdCl<sub>2</sub>(PPh<sub>3</sub>)<sub>2</sub> (21.0 mg, 0.030 mmol) and CuI (5.7 mg, 0.030 mmol) in diisopropylamine (5 mL) and THF (5 mL) was stirred at 65 °C for 12 h. After cooling to room temperature, the mixture was diluted with CHCl<sub>3</sub>. The organic layer was washed with 1N HCl (adjusted to pH ~7) and brine, dried over MgSO<sub>4</sub>, filtrated, and evaporated *in vacuo*. The residue was purified by flash column chromatography (CHCl<sub>3</sub>/MeOH/Et<sub>3</sub>N 100:1:1 to 100:5:1) and preparative TLC (CHCl<sub>3</sub>/EtOAc 95:5). Further purification was carried out by acid-base extraction as follows: To the solution of the product in CHCl<sub>3</sub> was added 4 M HCl/EtOAc, and the resulting red solid was filtered and washed with small amount of CHCl<sub>3</sub>. The red solid obtained was treated with Et<sub>3</sub>N in CHCl<sub>3</sub>, and the resulting organic layer was washed with H<sub>2</sub>O, dried over MgSO<sub>4</sub>, filtrated, and evaporated *in vacuo* to give **L3** as a yellow solid (74.5 mg, 30%).

<sup>1</sup>H NMR (500 MHz, CDCl<sub>3</sub>): δ 8.82 (dd, *J* = 2.5, 0.5 Hz, 2H), 8.44 (d, *J* = 3.0, 0.5 Hz, 2H), 7.94 (dd, *J* = 8.5, 2.0 Hz, 2H), 7.70 (d, *J* = 8.5, 2.0 Hz, 2H), 7.62–7.50 (m, 8H), 7.42 (d, *J* = 8.5 Hz, 2H), 7.38 (s, 2H), 6.78 (dd, *J* = 8.0, 2.0 Hz, 2H), 3.95 (s, 6H), 1.34 (s, 18H).

<sup>13</sup>C NMR (126 MHz, CDCl<sub>3</sub>, 50 °C): δ 176.83, 161.12, 154.53, 151.93, 140.23, 139.43, 133.80, 131.77 (peaks overlapped), 124.63, 122.21, 120.84, 120.65, 111.36, 108.06, 103.15, 93.89, 92.74, 88.42, 88.25, 56.23, 40.06, 27.80.

HR-MS (ESI-ToF-MS) *m/z*: [**L3**+Na]<sup>+</sup> calcd for C<sub>54</sub>H<sub>46</sub>N<sub>4</sub>O<sub>4</sub>Na 837.34113, found 837.34337.



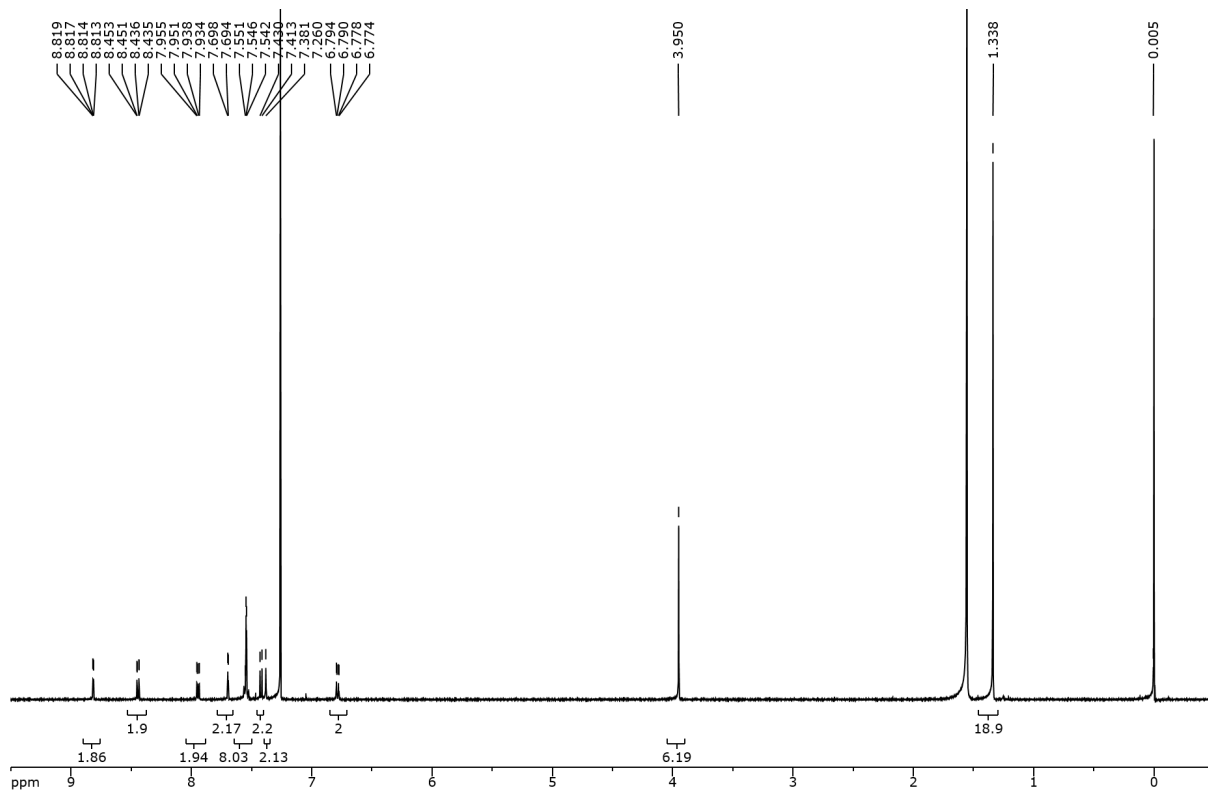

Fig. S18  $^1\text{H}$  NMR spectrum of compound **L3** (500 MHz,  $\text{CDCl}_3$ ).

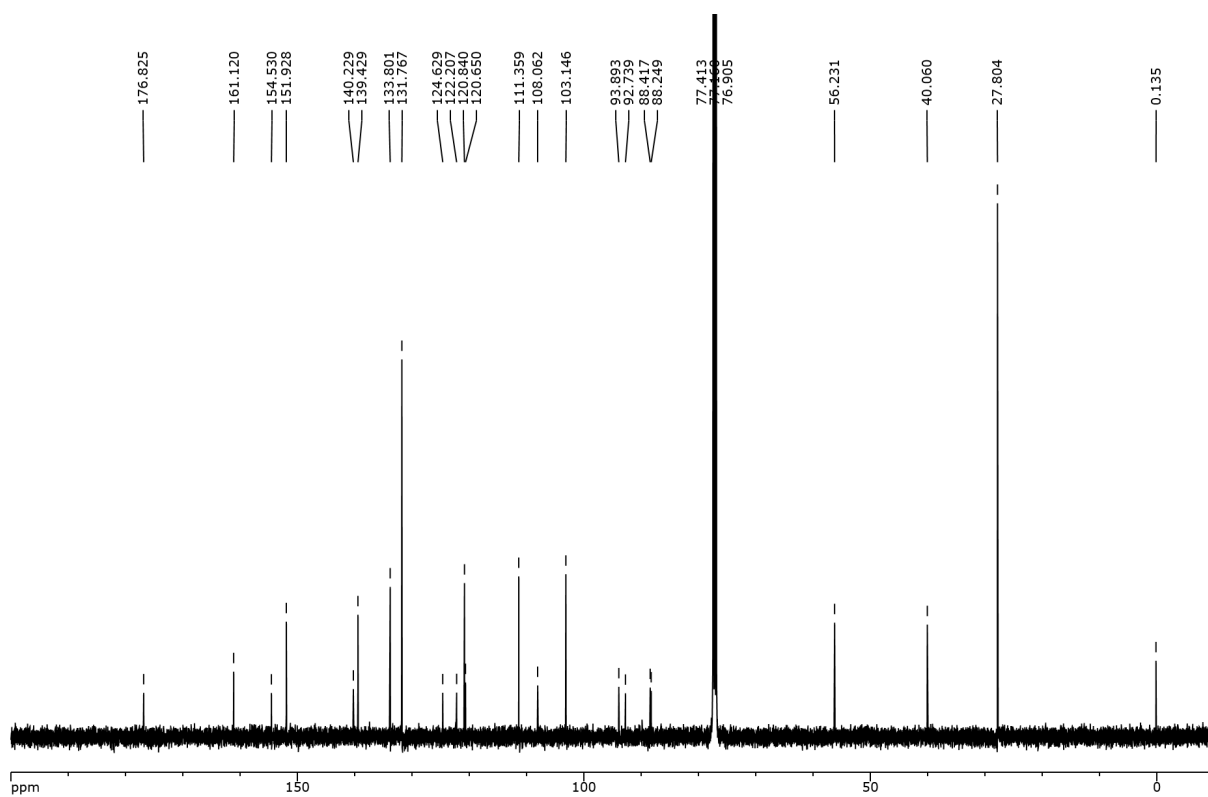

Fig. S19  $^{13}\text{C}$  NMR spectrum of compound **L3** (126 MHz,  $\text{CDCl}_3$ , 50  $^\circ\text{C}$ ).

### 3. Synthetic procedures and NMR spectra of biscyclometalated iridium complexes

#### 3.1 Synthesis and NMR spectra of complex [Ir(ppy)<sub>2</sub>(L1)]PF<sub>6</sub>

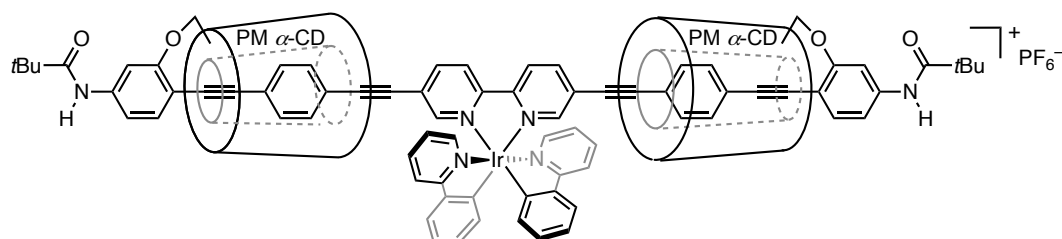

The mixture of **L1** (25.4 mg, 8  $\mu$ mol) and [Ir(ppy)<sub>2</sub>Cl]<sub>2</sub> (4.3 mg, 4  $\mu$ mol) in dichloromethane (0.8 mL) and methanol (0.4 mL) was stirred overnight at 60 °C, and then the solvent was removed *in vacuo*. After the residue was redissolved in dichloromethane (3 mL), KPF<sub>6</sub> (14.7 mg, 80  $\mu$ mol) was added. The mixture was stirred at room temperature for 10 min, and then the residue was filtered in order to eliminate the remaining inorganic salts. The resulting solution was evaporated *in vacuo*. The residue was purified by flash column chromatography (5%→10% methanol /dichloromethane) to give [Ir(ppy)<sub>2</sub>(**L1**)]PF<sub>6</sub> as an orange solid (30.0 mg, 98%).

<sup>1</sup>H NMR (500 MHz, CDCl<sub>3</sub>):  $\delta$  8.74 (d,  $J$  = 8.6 Hz, 2H), 8.16 (d,  $J$  = 6.1 Hz, 2H), 8.05 (d,  $J$  = 8.1 Hz, 4H), 7.95 (d,  $J$  = 8.2 Hz, 2H), 7.83–7.80 (m, 4H), 7.67 (d,  $J$  = 7.8 Hz, 2H), 7.61–7.57 (m, 2H), 7.52 (d,  $J$  = 7.6 Hz, 4H), 7.43–7.40 (m, 8H), 7.13 (dt,  $J$  = 12.2, 6.3 Hz, 2H), 7.06 (t,  $J$  = 7.4 Hz, 2H), 6.92–6.88 (m, 2H), 6.29 (t,  $J$  = 6.7 Hz, 2H), 5.08–4.96 (m, 12H), 4.75 (t,  $J$  = 8.5 Hz, 2H), 4.40 (d,  $J$  = 11.3 Hz, 2H), 4.26–4.16 (m, 6H), 4.03 (t,  $J$  = 10.6 Hz, 4H), 3.96–3.01 (m, 158H), 2.82 (d,  $J$  = 10.3 Hz, 2H), 1.33 (s, 18H).

<sup>13</sup>C NMR (126 MHz, CDCl<sub>3</sub>):  $\delta$  176.93, 167.82, 167.80, 162.80, 154.12, 154.10, 152.08, 152.01, 149.33, 148.95, 148.85, 143.54, 143.50, 141.89, 141.85, 140.45, 138.48, 138.46, 133.59, 132.69, 131.88, 131.70, 131.01, 130.88, 125.79, 124.86, 124.76, 124.69, 124.32, 123.82, 123.77, 122.99, 121.55, 121.52, 119.94, 119.88, 114.43, 112.96, 111.58, 100.80, 100.54, 100.51, 100.24, 100.21, 100.19, 99.98, 98.19, 96.75, 96.69, 92.72, 89.76, 85.60, 83.96, 82.80, 82.66 (peaks overlapped), 82.62, 82.44, 82.34, 82.22 (peaks overlapped), 82.07, 82.05, 82.02, 81.66, 81.60, 81.52, 81.39, 81.33, 81.28, 81.17, 72.65, 72.63, 72.04, 71.82, 71.65 (peaks overlapped), 71.63, 71.47, 71.34, 71.23 (peaks overlapped), 70.71, 70.26, 62.09, 62.05, 61.96, 61.94, 61.92, 61.88, 61.87, 61.85, 61.82, 61.70, 61.67, 59.28, 59.23, 59.05, 58.96, 58.91, 58.49, 58.23, 58.21, 58.02, 57.99, 57.86, 57.84, 57.73, 40.03, 27.69.

HR-MS (ESI-ToF-MS)  $m/z$ : [{Ir(ppy)<sub>2</sub>(**L1**)}+Na]<sup>2+</sup> calcd for C<sub>180</sub>H<sub>242</sub>IrN<sub>6</sub>O<sub>62</sub>Na 1848.2765, found 1848.2748.

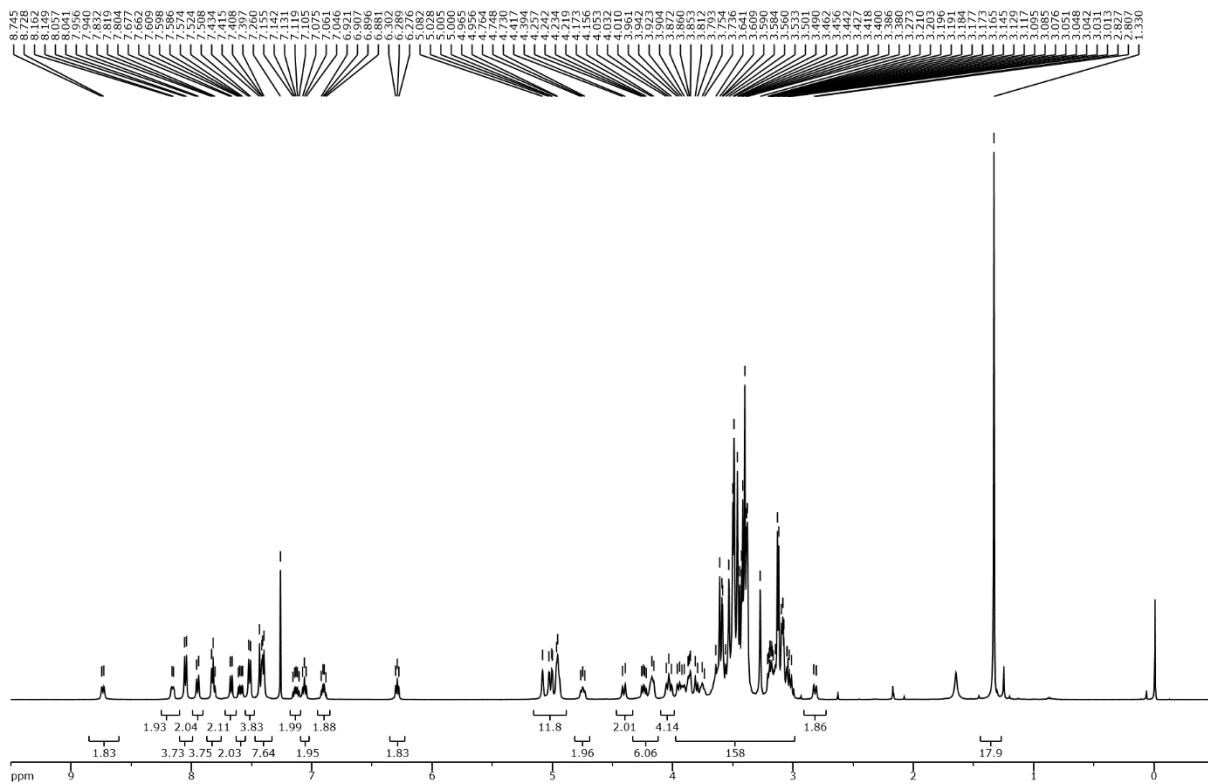

Fig. S20  $^1\text{H}$  NMR spectrum of complex  $[\text{Ir}(\text{ppy})_2(\text{L1})]\text{PF}_6$  (500 MHz,  $\text{CDCl}_3$ ).

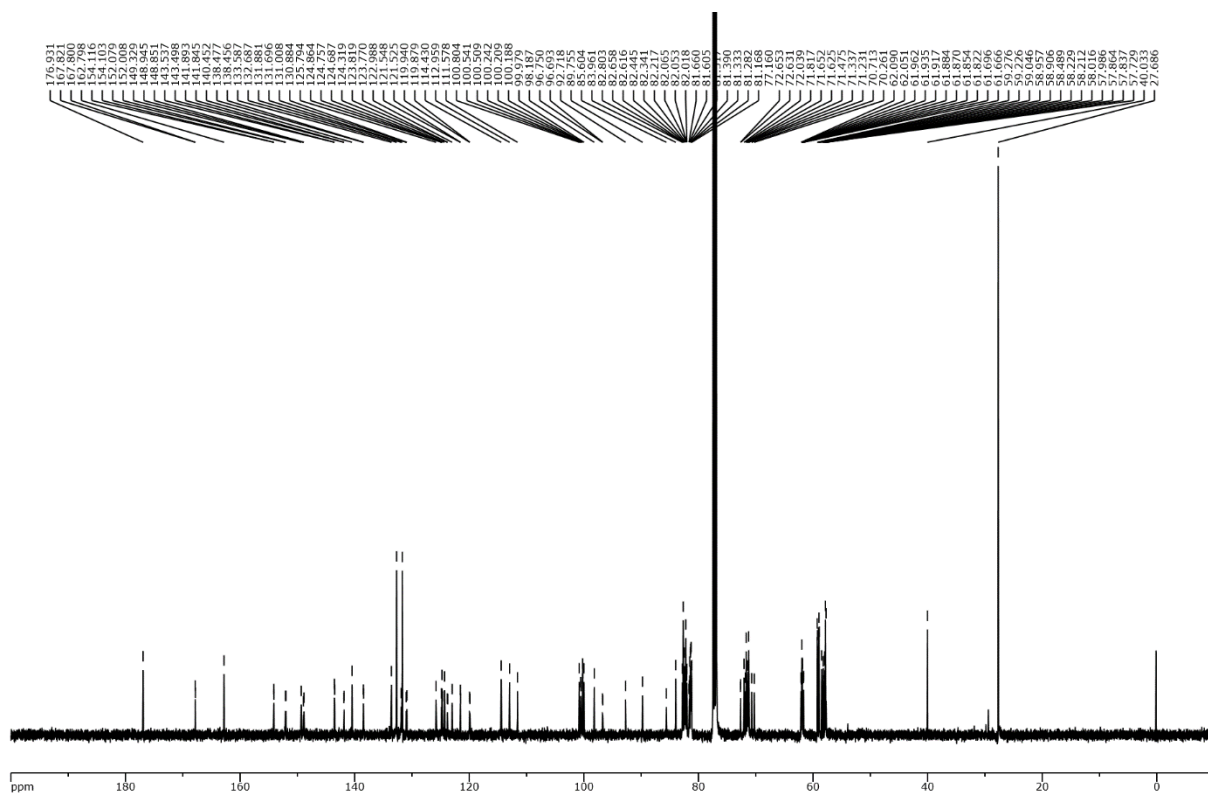

Fig. S21  $^{13}\text{C}$  NMR spectrum of complex  $[\text{Ir}(\text{ppy})_2(\text{L1})]\text{PF}_6$  (126 MHz,  $\text{CDCl}_3$ ).

### 3.2 Synthesis and NMR spectra of complex [Ir(ppy)<sub>2</sub>(L2)]PF<sub>6</sub>

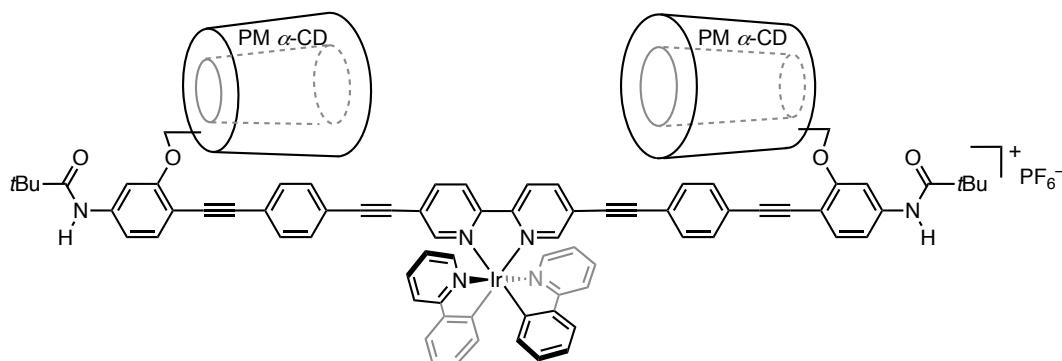

The mixture of **L2** (25.4 mg, 8  $\mu\text{mol}$ ) and [Ir(ppy)<sub>2</sub>Cl]<sub>2</sub> (4.3 mg, 4  $\mu\text{mol}$ ) in dichloromethane (0.8 mL) and methanol (0.4 mL) was stirred overnight at 60 °C, and then the solvent was removed *in vacuo*. After the residue was redissolved in dichloromethane (3 mL), KPF<sub>6</sub> (14.7 mg, 80  $\mu\text{mol}$ ) was added. The mixture was stirred at room temperature for 10 min, and then the residue was filtered in order to eliminate the remaining inorganic salts. The resulting solution was evaporated *in vacuo*. The residue was purified by flash column chromatography (5%→10% methanol /dichloromethane) to give [Ir(ppy)<sub>2</sub>(L2)]PF<sub>6</sub> as an orange solid (28.5 mg, 93%).

<sup>1</sup>H NMR (500 MHz, CDCl<sub>3</sub>):  $\delta$  8.51 (t,  $J$  = 8.6 Hz, 2H), 8.17 (t,  $J$  = 8.6 Hz, 2H), 7.97–7.93 (m, 4H), 7.86–7.79 (m, 4H), 7.71 (d,  $J$  = 7.8 Hz, 2H), 7.55–7.52 (m, 8H), 7.35–7.33 (m, 4H), 7.28 (s, 2H), 7.10–7.05 (m, 4H), 6.95 (t,  $J$  = 7.4 Hz, 2H), 6.73 (d,  $J$  = 6.9 Hz, 2H), 6.28 (d,  $J$  = 6.9 Hz, 2H), 5.18–4.99 (m, 12H), 4.55 (d,  $J$  = 9.2 Hz, 2H), 4.36–4.31 (m, 4H), 4.05 (d,  $J$  = 9.6 Hz, 2H), 3.91–3.15 (m, 164H), 3.01 (dd,  $J$  = 9.1, 2.9 Hz, 2H), 1.30 (s, 18H).

<sup>13</sup>C NMR (126 MHz, CDCl<sub>3</sub>):  $\delta$  177.00, 167.93, 160.21, 153.68, 152.19, 149.31, 148.71, 143.42, 141.82, 140.26, 138.40, 133.33, 131.94, 131.74, 131.61, 131.17, 125.50, 125.24, 125.15, 125.03, 123.57, 123.05, 120.32, 120.01, 111.14, 107.76, 103.77, 100.45, 100.40, 100.30 (peaks overlapped), 100.26, 100.07, 97.91, 92.68, 89.65, 85.75, 82.68, 82.50, 82.44, 82.40, 82.37, 82.34, 82.28 (peaks overlapped), 82.11, 81.82, 81.51, 81.43 (peaks overlapped), 81.38, 81.23, 71.50 (peaks overlapped), 71.44 (peaks overlapped), 71.36 (peaks overlapped), 70.99, 70.60, 67.67, 62.04, 62.00, 61.99, 61.95, 61.90 (peaks overlapped), 59.40, 59.23, 59.17 (peaks overlapped), 58.76, 58.22, 58.01, 57.90 (peaks overlapped), 57.89, 57.41, 39.98, 27.61.

HR-MS (ESI-ToF-MS)  $m/z$ : [{Ir(ppy)<sub>2</sub>(L2)}+Na]<sup>2+</sup> calcd for C<sub>180</sub>H<sub>242</sub>IrN<sub>6</sub>O<sub>62</sub>Na 1848.7776, found 1848.7777.

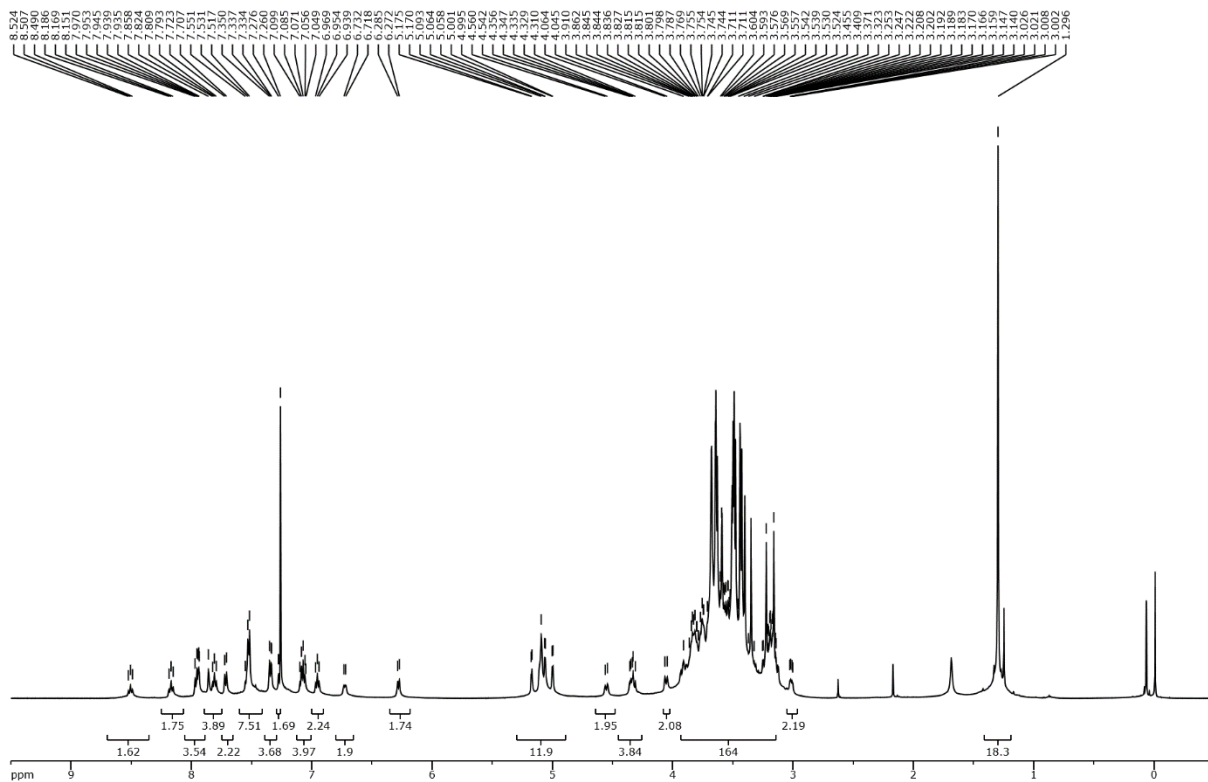

Fig. S22  $^1\text{H}$  NMR spectrum of complex  $[\text{Ir}(\text{ppy})_2(\text{L}2)]\text{PF}_6$  (500 MHz,  $\text{CDCl}_3$ ).

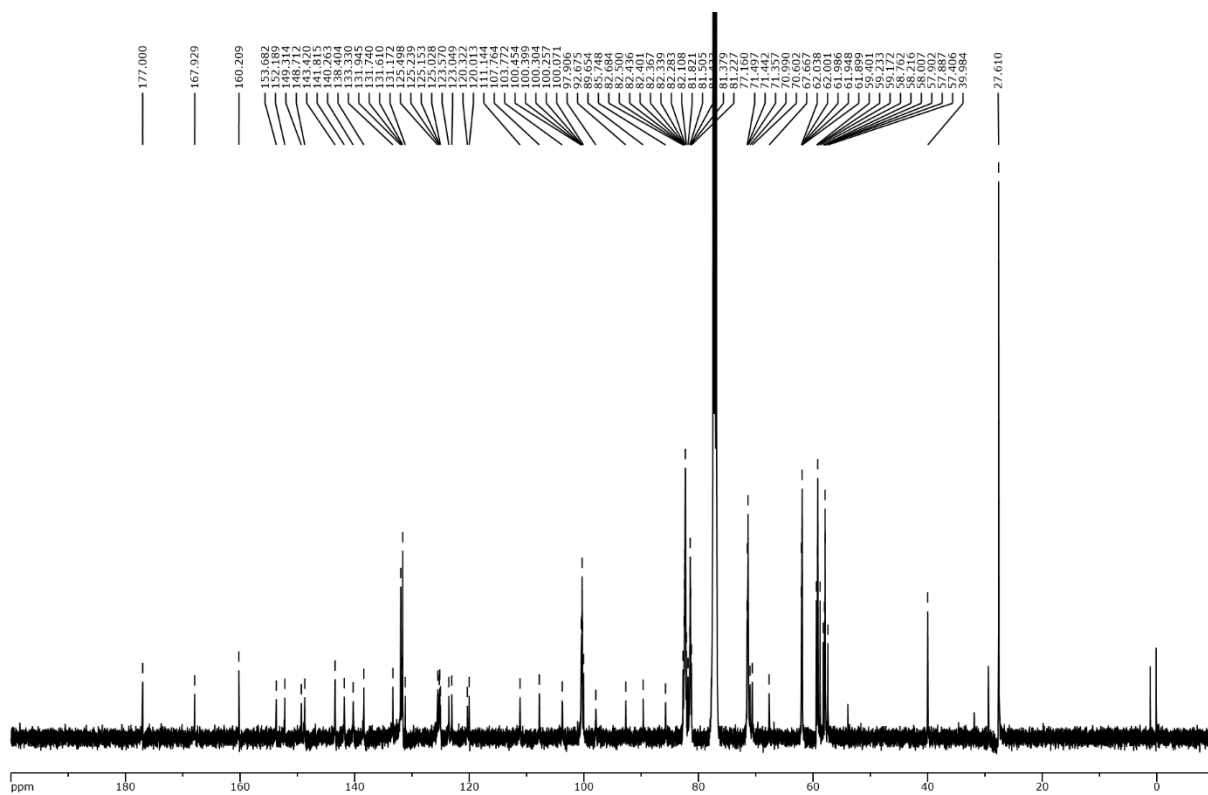

Fig. S23  $^{13}\text{C}$  NMR spectrum of complex  $[\text{Ir}(\text{ppy})_2(\text{L}2)]\text{PF}_6$  (126 MHz,  $\text{CDCl}_3$ ).

### 3.3 Synthesis and NMR spectra of complex [Ir(ppy)<sub>2</sub>(L3)]PF<sub>6</sub>

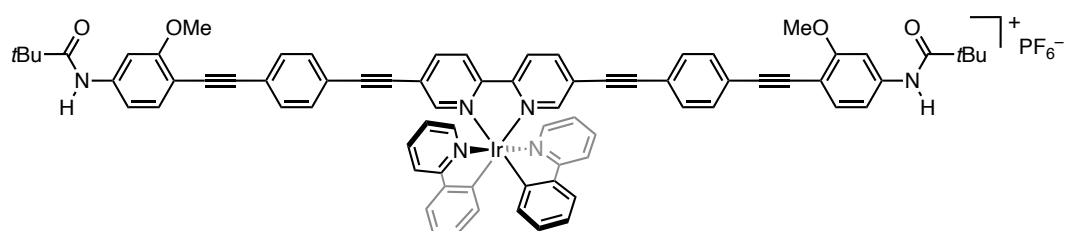

The mixture of **L3** (16.3 mg, 20  $\mu$ mol) and [Ir(ppy)<sub>2</sub>Cl]<sub>2</sub> (10.7 mg, 10  $\mu$ mol) in dichloromethane (3 mL) and methanol (1.5 mL) was stirred for 3 h at 60 °C, and then the solvent was removed *in vacuo*. After the residue was redissolved in dichloromethane (5 mL) and methanol (1 mL), KPF<sub>6</sub> (18.4 mg, 100  $\mu$ mol) was added. The mixture was stirred at room temperature for 15 min, and then the volatiles were evaporated *in vacuo*. The residue was purified by flash column chromatography (1%→5% methanol /dichloromethane) and preparative TLC (10% methanol /dichloromethane) to give [Ir(ppy)<sub>2</sub>(L3)]PF<sub>6</sub> as a red-orange solid (23.4 mg, 90%).

<sup>1</sup>H NMR (500 MHz, CDCl<sub>3</sub>):  $\delta$  8.53 (d,  $J$  = 8.5 Hz, 2H), 8.09 (dd,  $J$  = 8.5, 1.5 Hz, 2H), 7.99–7.87 (m, 4H), 7.78 (t,  $J$  = 8.0 Hz, 2H), 7.70 (d,  $J$  = 8.0 Hz, 2H), 7.62 (d,  $J$  = 1.5 Hz, 2H), 7.55 (s, 4H), 7.45 (d,  $J$  = 8.5 Hz, 4H), 7.42–7.31 (m, 6H), 7.22–7.00 (m, 4H), 6.99–6.88 (m, 4H), 6.27 (d,  $J$  = 7.5 Hz, 2H), 3.91 (s, 6H), 1.32 (s, 18H).

<sup>13</sup>C NMR (126 MHz, CDCl<sub>3</sub>):  $\delta$  177.21, 167.83, 160.82, 153.77, 152.10, 149.30, 148.75, 143.44, 141.77, 140.49, 138.43, 133.75, 131.91, 131.72, 131.68, 131.14, 125.45, 125.24, 125.13, 124.99, 123.62, 123.05, 120.47, 119.99, 111.45, 107.22, 102.81, 97.81, 92.38, 89.20, 85.76, 56.09, 40.01, 27.66.

HR-MS (ESI-ToF-MS)  $m/z$ : [Ir(ppy)<sub>2</sub>(L3)]<sup>+</sup> calcd for C<sub>76</sub>H<sub>62</sub>IrN<sub>6</sub>O<sub>4</sub> 1315.4464, found 1315.4449.

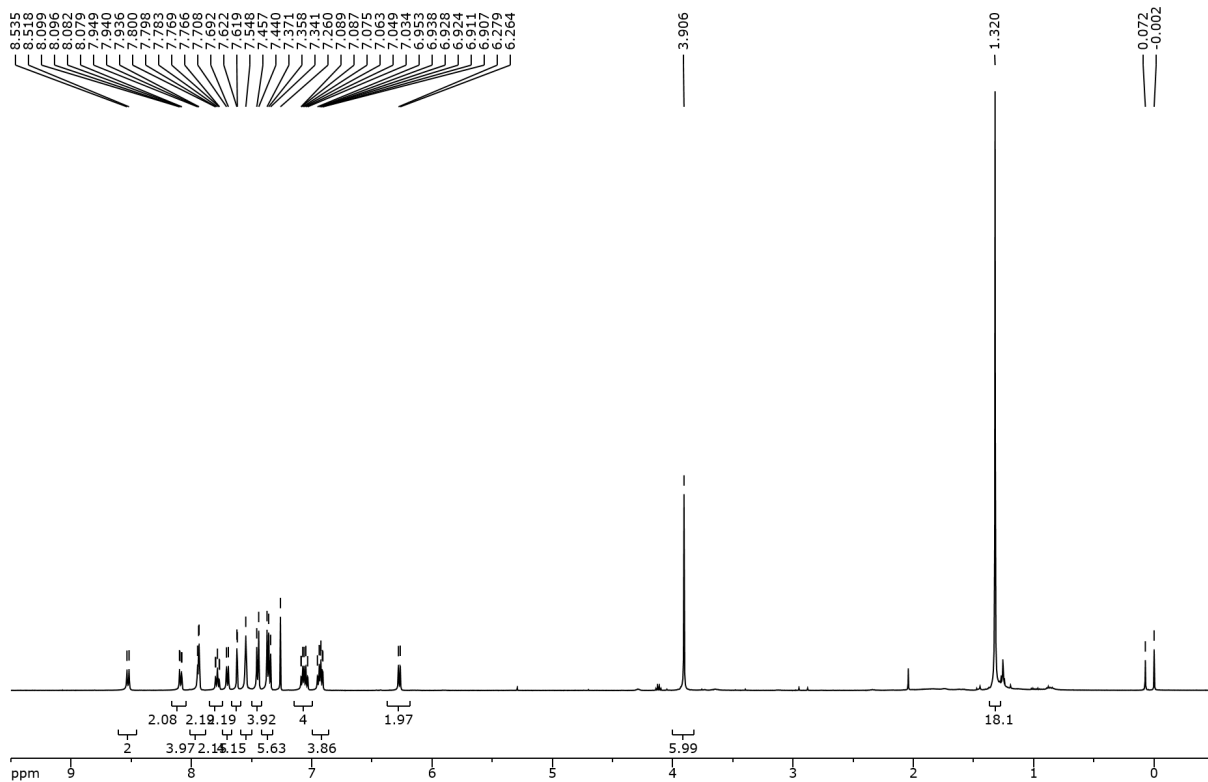

Fig. S24  $^1\text{H}$  NMR spectrum of complex  $[\text{Ir}(\text{ppy})_2(\text{L3})]\text{PF}_6$  (500 MHz,  $\text{CDCl}_3$ ).

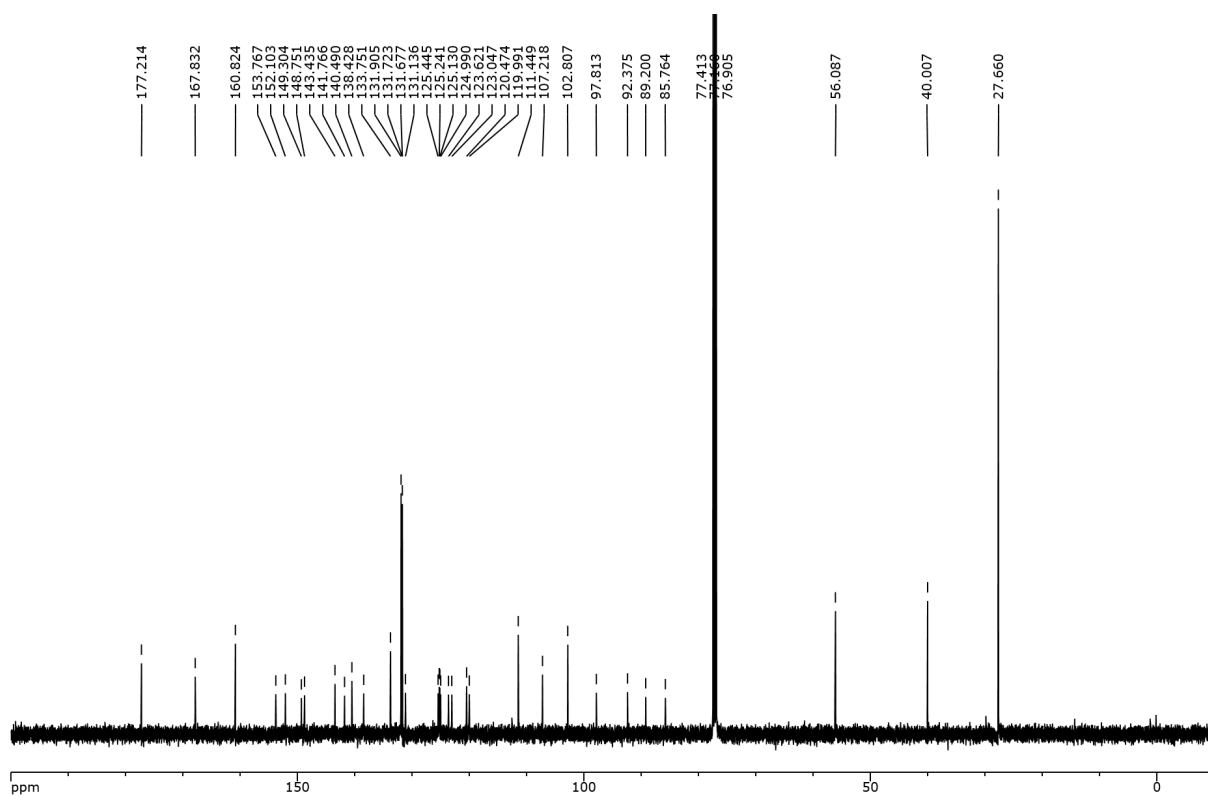

Fig. S25  $^{13}\text{C}$  NMR spectrum of complex  $[\text{Ir}(\text{ppy})_2(\text{L3})]\text{PF}_6$  (126 MHz,  $\text{CDCl}_3$ ).

## 4. General procedures for photochemical experiments

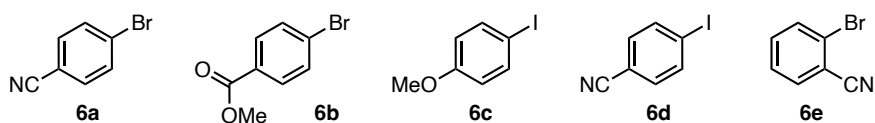

Fig. S26 Aryl halides used in this work.

### 4.1 Experimental procedure for C–O coupling reactions with alcohols

To a solution of  $\text{NiCl}_2 \cdot \text{DME}$  in DMF (2 mM, 0.5 mL, 1  $\mu\text{mol}$ ) in a 5 mL vial with a stir bar, aryl halide (**6**, 0.1 mmol), alcohol (4 or 8 mmol), **L1** (3.2 mg, 1  $\mu\text{mol}$ ),  $i\text{Pr}_2\text{EtN}$  (34  $\mu\text{L}$ , 0.2 mmol) and 1,3,5-trimethoxybenzene (0.1 mmol) as an internal standard were added, and the mixture was stirred at 600 rpm under 427 nm LED irradiation with cooling fans for 20 or 48 h. After the respective reaction time, brine was added, and extracted with ethyl acetate. The organic layer was dried over  $\text{MgSO}_4$ , filtered, and concentrated. The crude product was subjected to  $^1\text{H}$  NMR analysis to determine the substrate conversion and product yield. Meanwhile, the same reaction without 1,3,5-trimethoxybenzene was carried out, and the resulting crude product was then purified by flash column chromatography (10 or 3% ethyl acetate/hexane in the reactions with primary or secondary alcohols, respectively) to isolate the desired product.

### 4.2 Experimental procedure for C–O coupling reactions with $\text{H}_2\text{O}$

To a solution of  $\text{NiCl}_2 \cdot \text{DME}$  and **L1** in DMF (0.2 or 0.4 mM, 0.5 mL, 0.1 or 0.2  $\mu\text{mol}$ ) in a 5 mL vial with a stir bar, 4- or 2-bromobenzonitrile (**6a** or **6e**, 18.2 mg, 0.1 mmol),  $\text{H}_2\text{O}$  (72  $\mu\text{L}$ , 4 mmol),  $i\text{Pr}_2\text{EtN}$  (34  $\mu\text{L}$ , 0.2 mmol) and 1,3,5-trimethoxybenzene (0.1 mmol) as an internal standard were added, and the mixture was stirred at 600 rpm under 427 nm LED irradiation with cooling fans for 3 or 6 h. After the respective reaction time, brine was added, and extracted with ethyl acetate. The organic layer was dried over  $\text{MgSO}_4$ , filtered, and concentrated. The crude product was subjected to  $^1\text{H}$  NMR analysis to determine the substrate conversion and product yield. Meanwhile, the same reaction without 1,3,5-trimethoxybenzene was carried out, and the resulting crude product was then purified by flash column chromatography (25% ethyl acetate/hexane) to isolate the desired product.

[For 10 mmol scale with 0.02 mol% Ni] To a solution of  $\text{NiCl}_2 \cdot \text{DME}$  (0.44 mg in DMF 200  $\mu\text{L}$ , 2  $\mu\text{mol}$ ) and **L1** (6.4 mg, 2  $\mu\text{mol}$ ) in DMF (7.3 mL, in total 7.5 mL) in a 20 mL Schlenk flask with a stir bar, 4-bromobenzonitrile (**6a**, 1.82 g, 10 mmol),  $\text{H}_2\text{O}$  (720  $\mu\text{L}$ , 40 mmol), and  $i\text{Pr}_2\text{EtN}$  (3.4 mL, 20 mmol) were added. The mixture was degassed by three freeze–pump–thaw cycles, and vigorously stirred at under 427 nm LED irradiation (4 cm away below the LEDs) with cooling fans for 17 h. After the respective reaction time, brine and 1N HCl aq. was added, and



extracted with Et<sub>2</sub>O/EtOAc. The organic layer was dried over MgSO<sub>4</sub>, filtered, and concentrated. The residue was purified by flash column chromatography (20%→50% ethyl acetate/hexane) to isolate the desired product **7f** as a colorless solids (781.2 mg, 66% yield).

### 4.3 Experimental procedure for C–N coupling reaction

To a solution of NiCl<sub>2</sub>·DME in *N,N*-dimethylacetamide (DMA) (2 mM, 0.5 mL, 1 μmol) in a 5 mL vial with a stir bar, 4-bromobenzonitrile (**6a**, 18.2 mg, 0.1 mmol), *n*-octylamine (83 μL, 0.5 mmol), **L1** (3.2 mg, 1 μmol), 1,4-diazabicyclo[2.2.2]octane (DABCO) (22.4 mg, 0.2 mmol) and 1,3,5-trimethoxybenzene (0.1 mmol) as an internal standard were added, and the mixture was stirred at 600 rpm under 427 nm LED irradiation with cooling fans for 48 h. After the reaction time, brine was added, and extracted with ethyl acetate. The organic layer was dried over MgSO<sub>4</sub>, filtered, and concentrated. The crude product was subjected to <sup>1</sup>H NMR analysis to determine the substrate conversion and product yield. Meanwhile, the same reaction without 1,3,5-trimethoxybenzene was carried out, and the resulting crude product was then purified by flash column chromatography (10% ethyl acetate/hexane) to isolate the desired product.

## 5. Characterization of products

### 5.1 Characterization of 4-methoxybenzonitrile (**7a**)

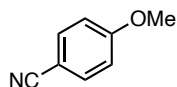

The product **7a** was obtained from 4-bromobenzonitrile (**6a**, 18.2 mg, 0.1 mmol) and methanol (162 μL, 4 mmol) for 20 h as a white solid (94% NMR yield; 9.0 mg, 68% isolated yield).

<sup>1</sup>H NMR (500 MHz, CDCl<sub>3</sub>): δ 7.59 (d, *J* = 8.9 Hz, 2H), 6.95 (d, *J* = 8.9 Hz, 2H), 3.86 (s, 3H).

<sup>13</sup>C NMR (126 MHz, CDCl<sub>3</sub>): δ 162.97, 134.12, 119.36, 114.88, 104.13, 55.68.

These spectral data match those reported in the literature.<sup>3</sup>

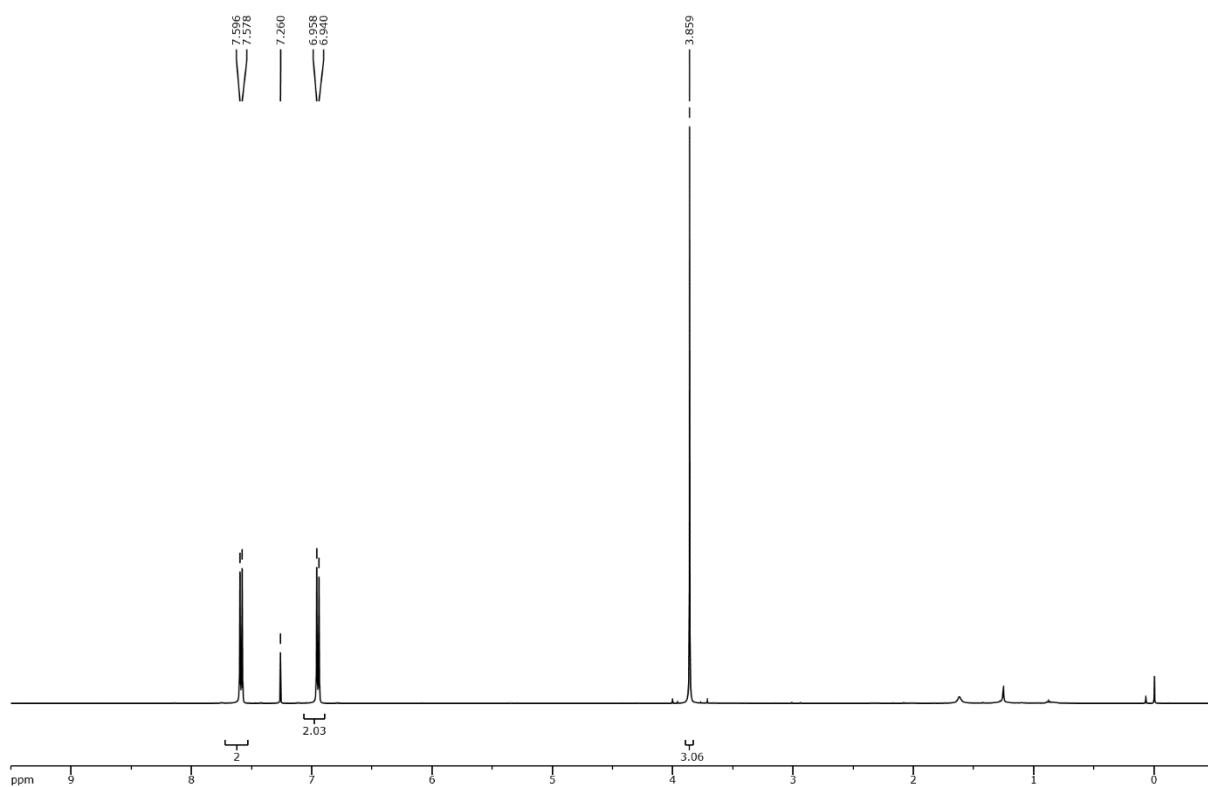

Fig. S27 <sup>1</sup>H NMR spectrum of compound **7a** (500 MHz, CDCl<sub>3</sub>).

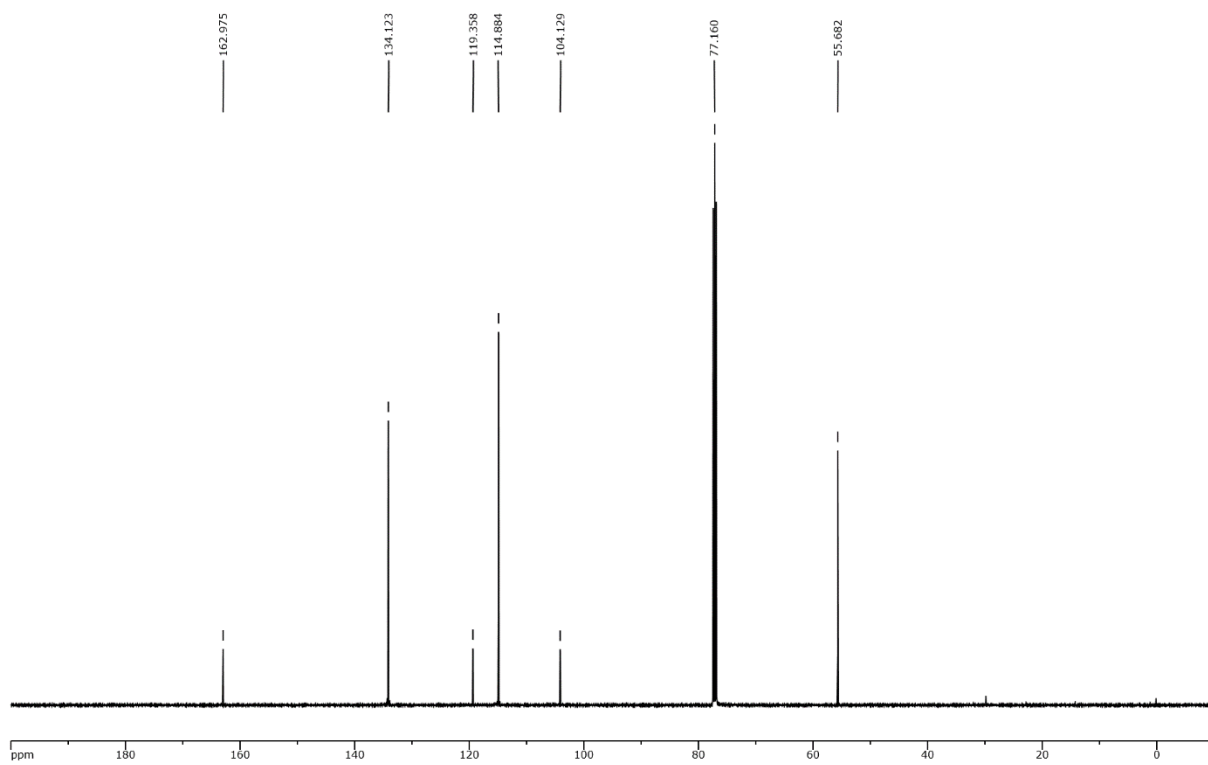

Fig. S28 <sup>13</sup>C NMR spectrum of compound **7a** (126 MHz, CDCl<sub>3</sub>).

## 5.2 Characterization of methyl 4-methoxybenzoate (**7b**)

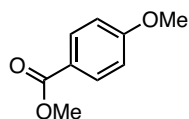

The product **7b** was obtained from methyl 4-bromobenzoate (**6b**, 21.5 mg, 0.1 mmol) and methanol (162  $\mu$ L, 4 mmol) for 20 h as a white solid (97% NMR yield; 12.1 mg, 73% isolated yield).

$^1\text{H}$  NMR (500 MHz,  $\text{CDCl}_3$ ):  $\delta$  7.99 (d,  $J = 9.0$  Hz, 2H), 6.91 (d,  $J = 9.0$  Hz, 2H), 3.88 (s, 3H), 3.86 (s, 3H).

$^{13}\text{C}$  NMR (126 MHz,  $\text{CDCl}_3$ ):  $\delta$  167.00, 163.46, 131.72, 122.76, 113.74, 55.55, 52.00.

These spectral data match those reported in the literature.<sup>3</sup>

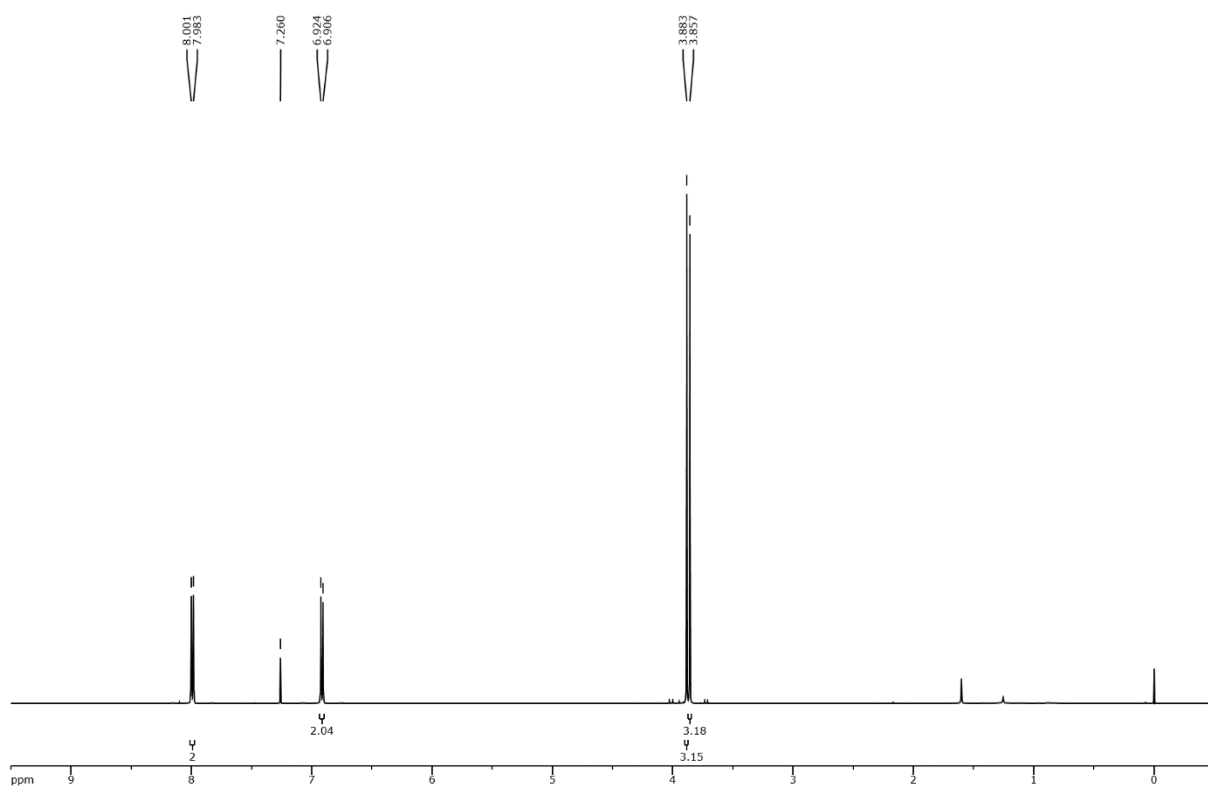

Fig. S29  $^1\text{H}$  NMR spectrum of compound **7b** (500 MHz,  $\text{CDCl}_3$ ).

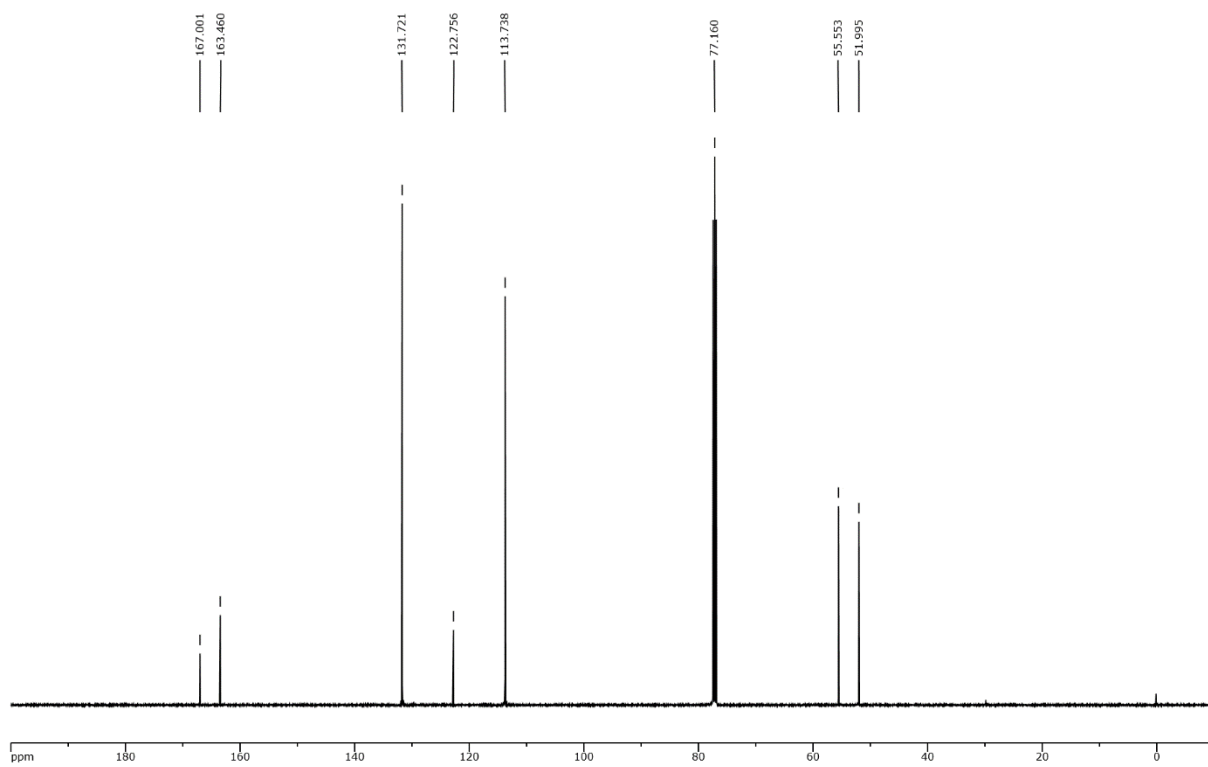

Fig. S30  $^{13}\text{C}$  NMR spectrum of compound **7b** (126 MHz,  $\text{CDCl}_3$ ).

### 5.3 Characterization of 1,4-dimethoxybenzene (7c)

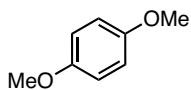

The product **7c** was obtained from 1-iodo-4-methoxybenzene (**6c**, 23.4 mg, 0.1 mmol) and methanol (324  $\mu$ L, 8 mmol) for 48 h as a white solid (92% NMR yield; 8.3 mg, 60% isolated yield).

$^1\text{H}$  NMR (500 MHz,  $\text{CDCl}_3$ ):  $\delta$  6.84 (s, 4H), 3.77 (s, 6H).

$^{13}\text{C}$  NMR (126 MHz,  $\text{CDCl}_3$ ):  $\delta$  153.92, 114.81, 55.91.

These spectral data match those reported in the literature.<sup>3</sup>

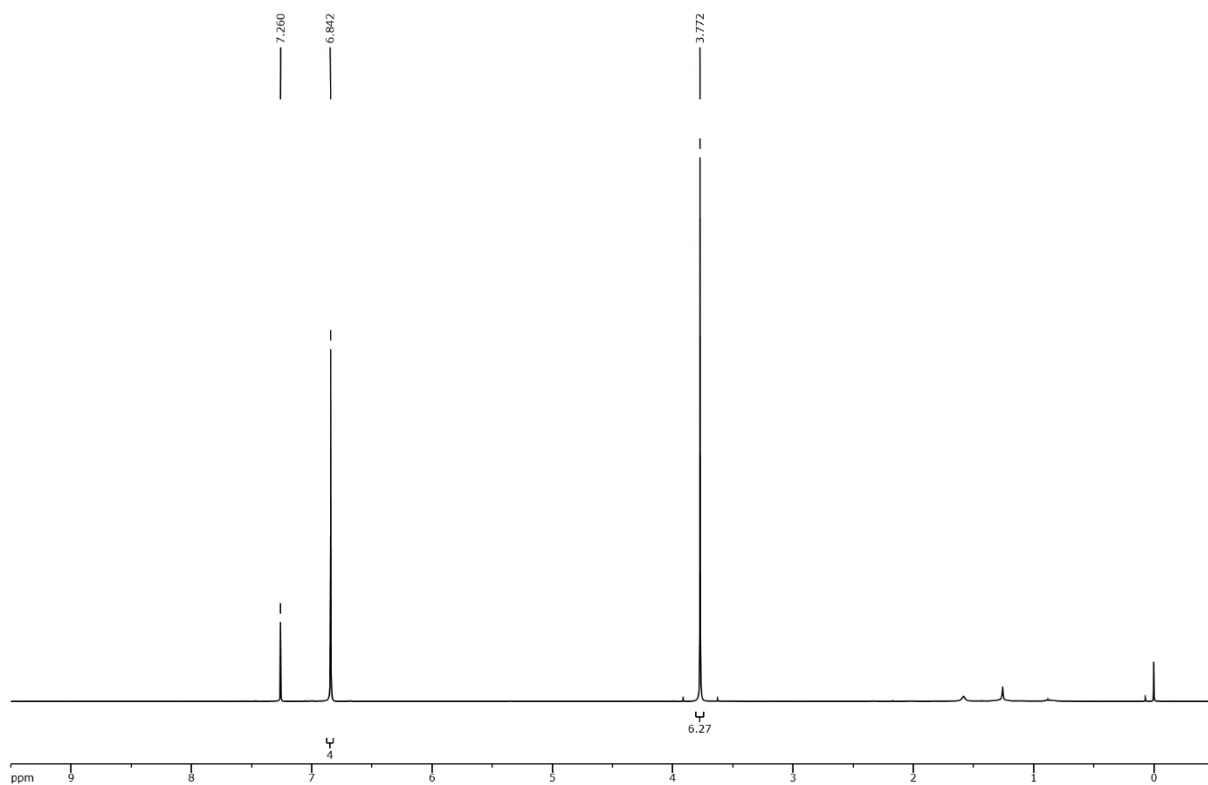

Fig. S31 <sup>1</sup>H NMR spectrum of compound **7c** (500 MHz, CDCl<sub>3</sub>).

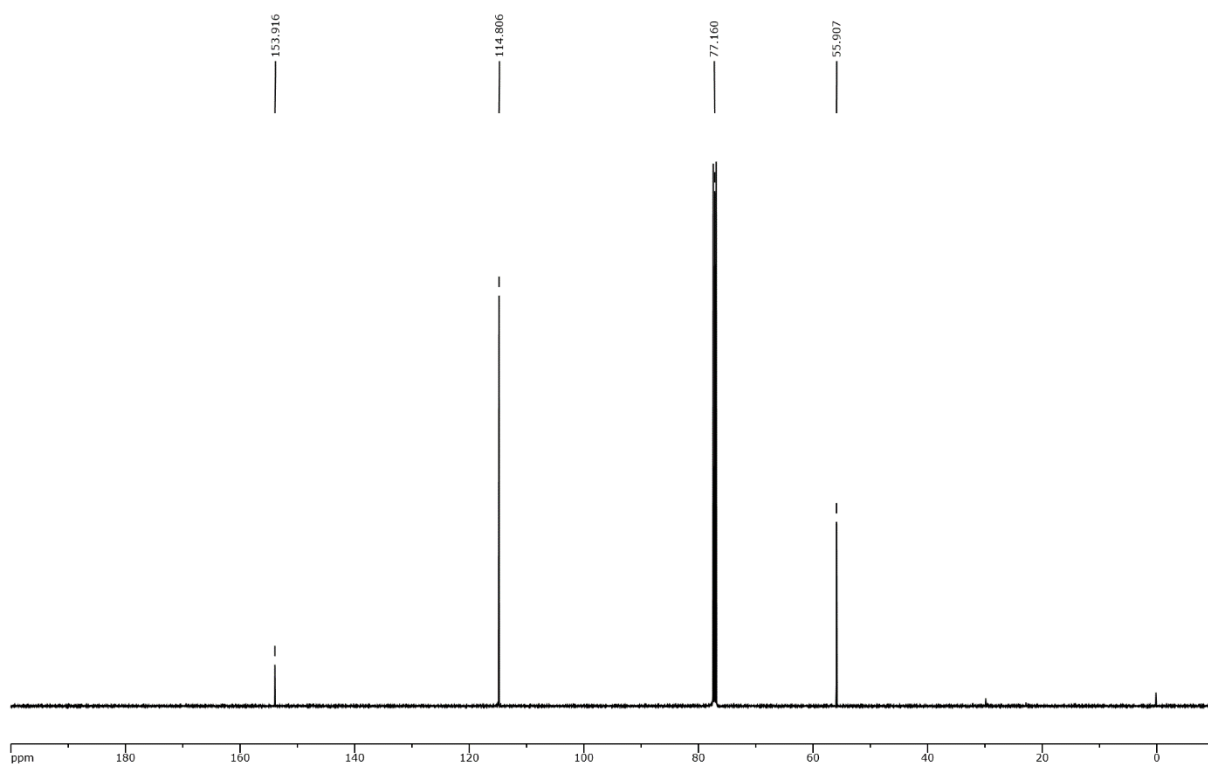

Fig. S32 <sup>13</sup>C NMR spectrum of compound **7c** (126 MHz, CDCl<sub>3</sub>).

#### 5.4 Characterization of 4-(hexyloxy)benzonitrile (**7d**)

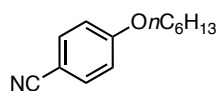

The product **7d** was obtained from 4-bromobenzonitrile (**6a**, 18.2 mg, 0.1 mmol) and 1-hexanol (499  $\mu$ L, 4 mmol) for 48 h as a colorless oil (71% NMR yield; 14.0 mg, 69% isolated yield). Hydration product, 4-hydroxybenzonitrile (**7f**, 28% NMR yield), was also observed in the crude product.

$^1\text{H}$  NMR (500 MHz,  $\text{CDCl}_3$ ):  $\delta$  7.57 (d,  $J = 9.0$  Hz, 2H), 6.93 (d,  $J = 8.9$  Hz, 2H), 3.99 (t,  $J = 6.5$  Hz, 2H), 1.79 (quintet,  $J = 7.1$  Hz, 2H), 1.45 (quintet,  $J = 7.4$  Hz, 2H), 1.35–1.32 (m, 4H), 0.91 (t,  $J = 7.1$  Hz, 3H).

$^{13}\text{C}$  NMR (126 MHz,  $\text{CDCl}_3$ ):  $\delta$  162.59, 134.07, 119.46, 115.30, 103.76, 68.56, 31.62, 29.07, 25.74, 22.69, 14.13.

These spectral data match those reported in the literature.<sup>4</sup>

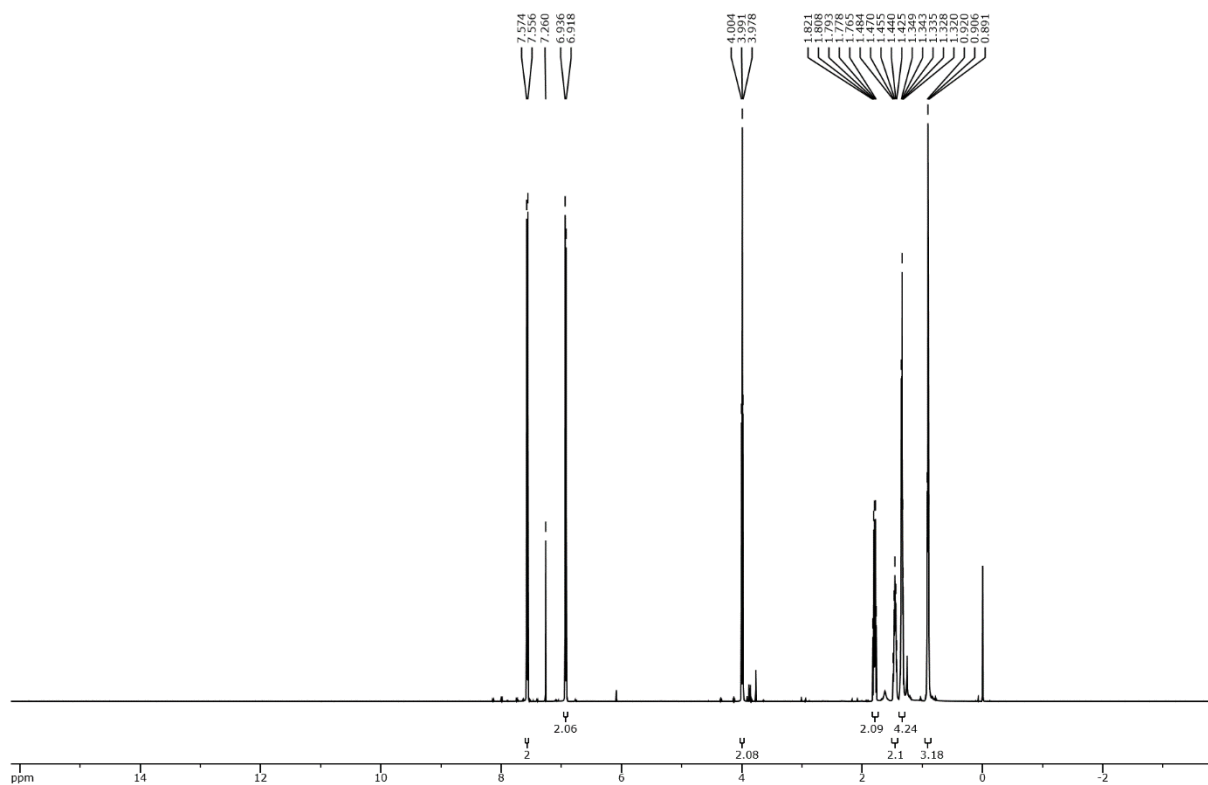

Fig. S33  $^1\text{H}$  NMR spectrum of compound **7d** (500 MHz,  $\text{CDCl}_3$ ).

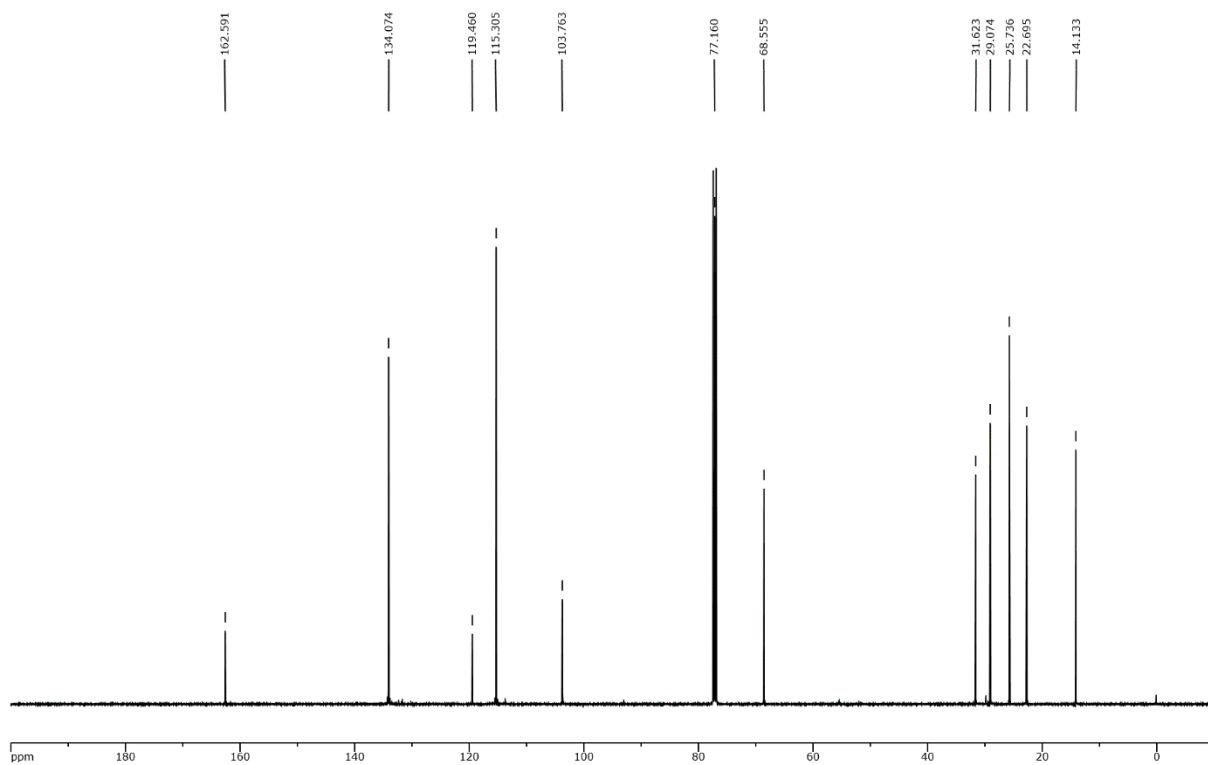

Fig. S34  $^{13}\text{C}$  NMR spectrum of compound **7d** (126 MHz,  $\text{CDCl}_3$ ).



### 5.5 Characterization of 4-(cyclopentyloxy)benzonitrile (7e)

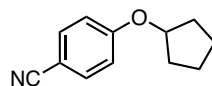

The product **7e** was obtained from 4-iodobenzonitrile (**6d**, 22.9 mg, 0.1 mmol) and cyclopentanol (725  $\mu$ L, 8 mmol) for 48 h as a colorless oil (83% conversion, 60% NMR yield; 9.4 mg, 50% isolated yield). Dehaloprotonation product, benzonitrile (20% NMR yield), was also observed in the crude product.

$^1\text{H}$  NMR (500 MHz,  $\text{CDCl}_3$ ):  $\delta$  7.55 (d,  $J = 8.9$  Hz, 2H), 6.90 (d,  $J = 8.8$  Hz, 2H), 4.80 (quintet,  $J = 3.0$  Hz, 1H), 1.95–1.92 (m, 2H), 1.86–1.78 (m, 4H), 1.66–1.63 (m, 2H).

$^{13}\text{C}$  NMR (126 MHz,  $\text{CDCl}_3$ ):  $\delta$  161.69, 134.03, 119.56, 116.19, 103.39, 80.05, 32.92, 24.16.

These spectral data match those reported in the literature.<sup>5</sup>

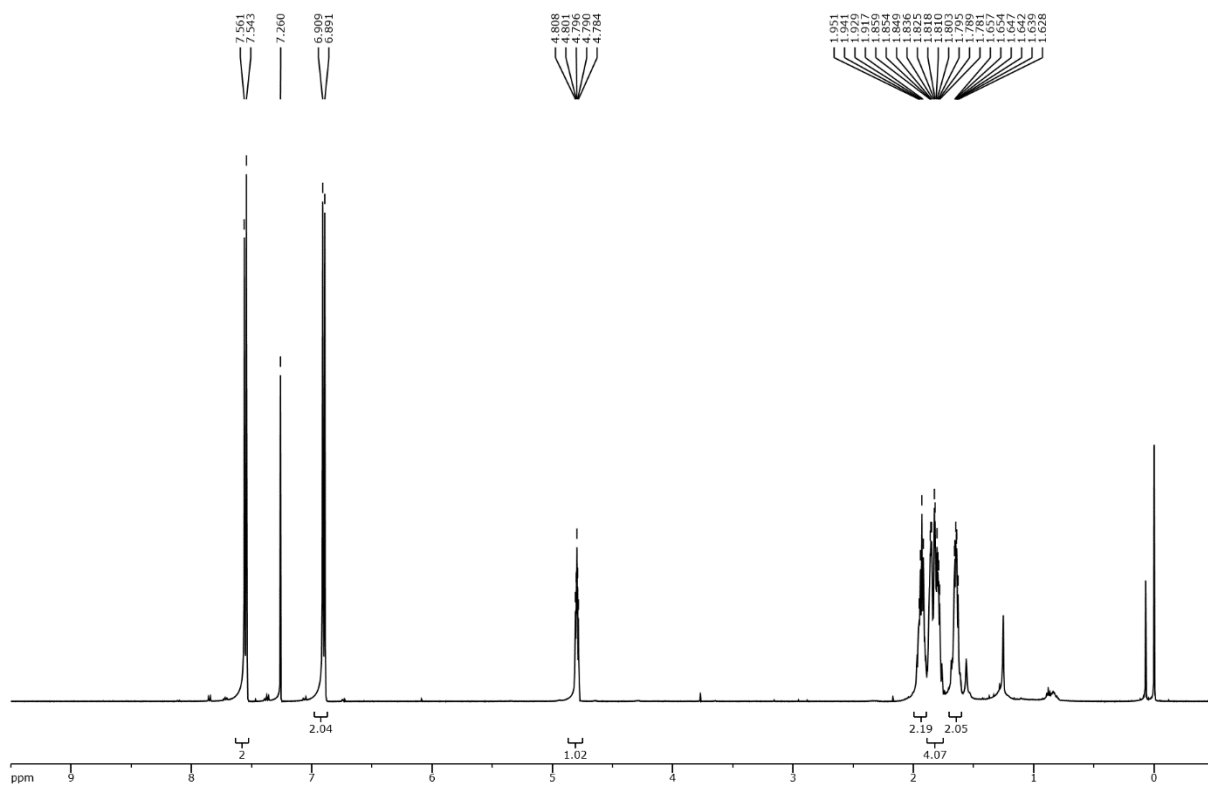

Fig. S35  $^1\text{H}$  NMR spectrum of compound **7e** (500 MHz,  $\text{CDCl}_3$ ).

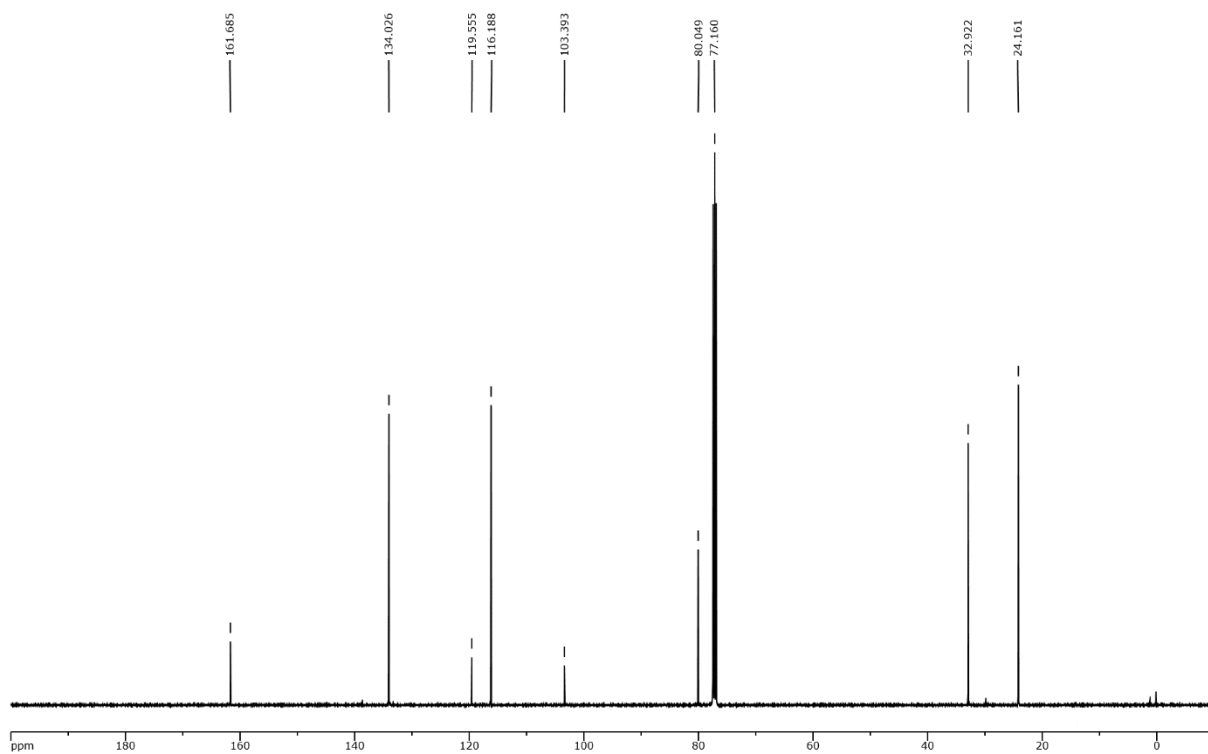

Fig. S36  $^{13}\text{C}$  NMR spectrum of compound **7e** (126 MHz,  $\text{CDCl}_3$ ).

## 5.6 Characterization of 4-hydroxybenzonitrile (**7f**)

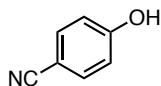

The product **7f** was obtained from 4-bromobenzonitrile (**6a**) with 0.1 mol% Ni/**L1** for 3 h as a white solid (94% NMR yield; 10.5 mg, 88% isolated yield). For 10 mmol scale with 0.02 mol% Ni/**L1** for 17 h; 781.2 mg, 66% isolated yield (TON 3300).

$^1\text{H}$  NMR (500 MHz,  $\text{CDCl}_3$ ):  $\delta$  7.55 (d,  $J = 8.8$  Hz, 2H), 6.93 (d,  $J = 8.8$  Hz, 2H), 6.34 (s, 1H).

$^{13}\text{C}$  NMR (126 MHz,  $\text{CDCl}_3$ ):  $\delta$  160.05, 134.46, 119.33, 116.55, 103.58.

These spectral data match those reported in the literature.<sup>6</sup>

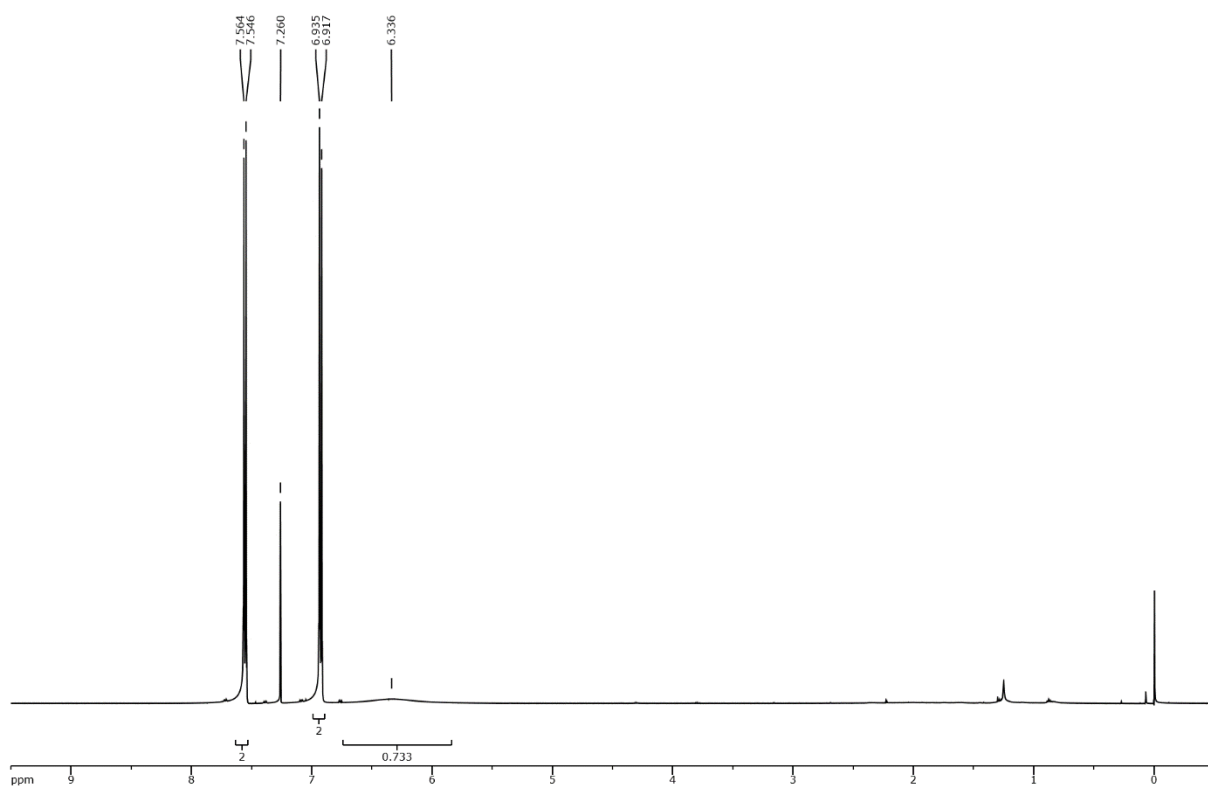

Fig. S37 <sup>1</sup>H NMR spectrum of compound **7f** (500 MHz, CDCl<sub>3</sub>).

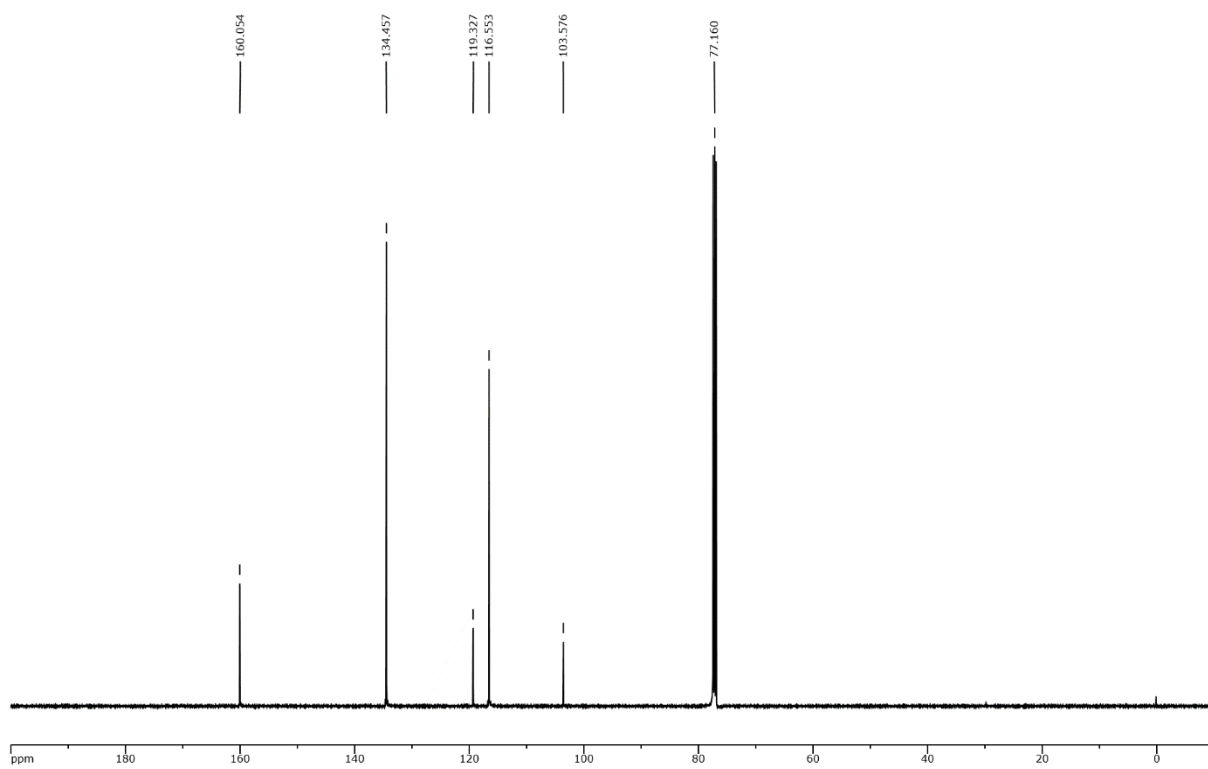

Fig. S38 <sup>13</sup>C NMR spectrum of compound **7f** (126 MHz, CDCl<sub>3</sub>).

### 5.7 Characterization of 2-hydroxybenzonitrile (**7g**)

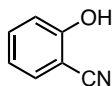

The product **7g** was obtained from 2-bromobenzonitrile (**6e**) with 0.2 mol% Ni/**L1** for 6 h as a white solid (76% NMR yield; 8.9 mg, 75% isolated yield). Homocoupling product, [1,1'-biphenyl]-2,2'-dicarbonitrile (24% NMR yield based on **6e**), was also observed in the crude product.

$^1\text{H}$  NMR (500 MHz,  $\text{CDCl}_3$ ):  $\delta$  7.52–7.46 (m, 2H), 7.01–6.98 (m, 2H).

$^{13}\text{C}$  NMR (126 MHz,  $\text{CDCl}_3$ ):  $\delta$  158.60, 134.90, 133.00, 121.16, 116.76, 116.42, 99.65.

These spectral data match those reported in the literature.<sup>6</sup>

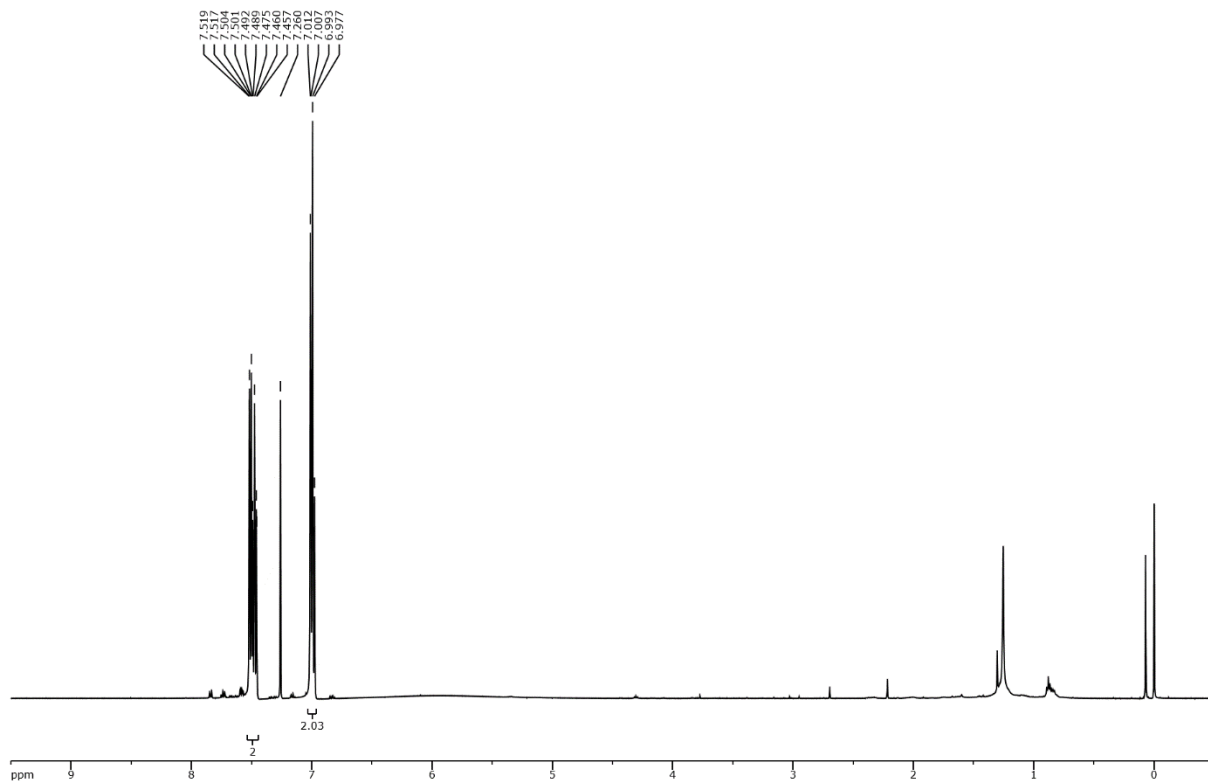

Fig. S39  $^1\text{H}$  NMR spectrum of compound **7g** (500 MHz,  $\text{CDCl}_3$ ).

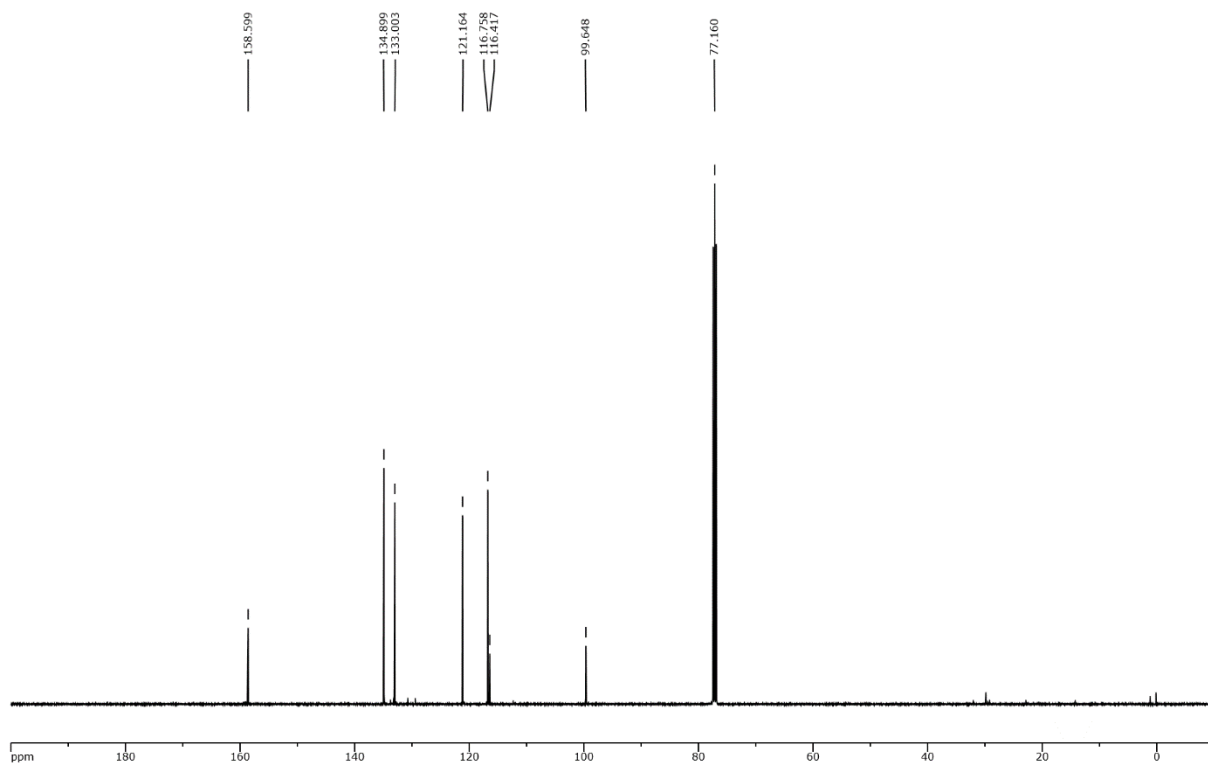

Fig. S40  $^{13}\text{C}$  NMR spectrum of compound **7g** (126 MHz,  $\text{CDCl}_3$ ).

## 5.8 Characterization of 4-(octylamino)benzonitrile (**8a**)

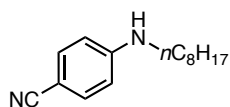

The product **8a** was obtained as a white solid (86% NMR yield; 18.6 mg, 81% isolated yield). Hydration product, 4-hydroxybenzonitrile (**7f**, 13% NMR yield), was also observed in the crude product.

$^1\text{H}$  NMR (500 MHz,  $\text{CDCl}_3$ ):  $\delta$  7.40 (d,  $J = 8.8$  Hz, 2H), 6.53 (d,  $J = 8.8$  Hz, 2H), 4.21 (s, 1H), 3.13 (q,  $J = 6.3$  Hz, 2H), 1.62 (quintet,  $J = 7.3$  Hz, 2H), 1.41-1.27 (m, 10H), 0.88 (t,  $J = 6.9$  Hz, 3H).

$^{13}\text{C}$  NMR (126 MHz,  $\text{CDCl}_3$ ):  $\delta$  151.59, 133.79, 120.71, 112.13, 98.36, 43.35, 31.90, 29.42, 29.32, 29.27, 27.14, 22.75, 14.20.

These spectral data match those reported in the literature.<sup>7</sup>

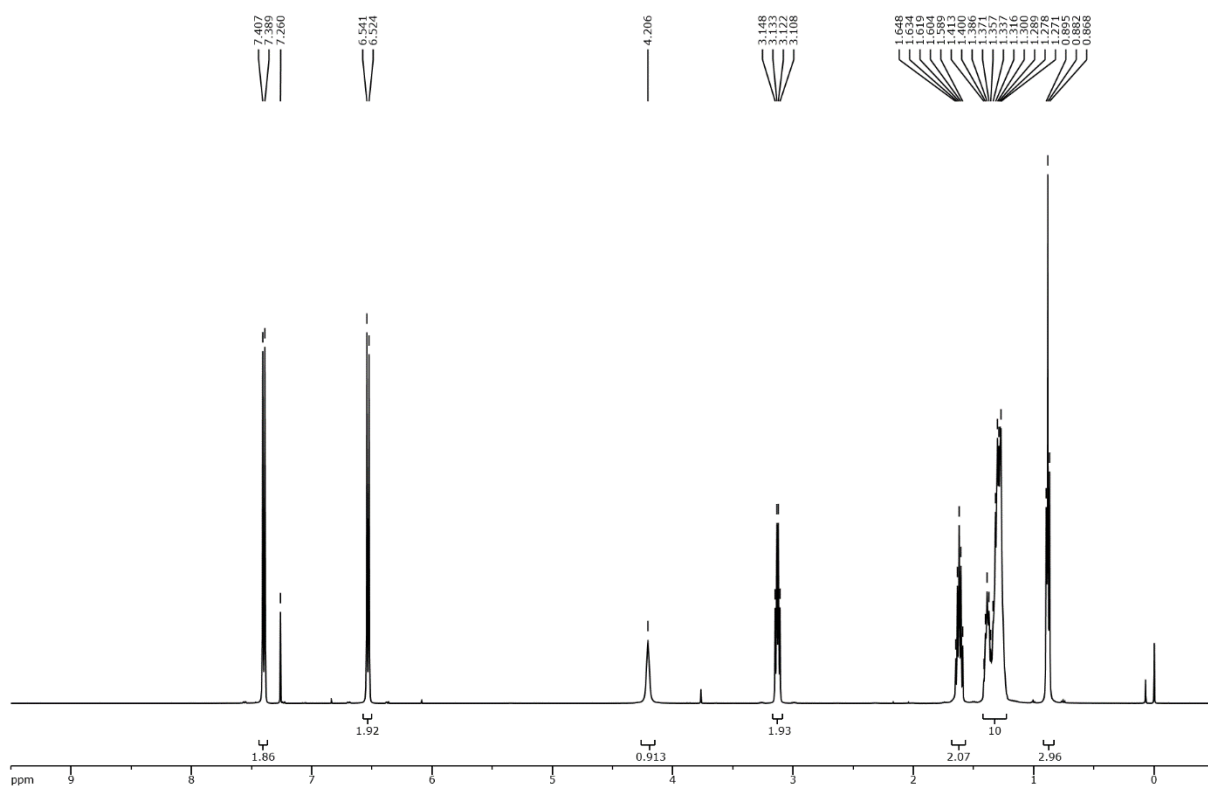

Fig. S41  $^1\text{H}$  NMR spectrum of compound **8a** (500 MHz,  $\text{CDCl}_3$ ).

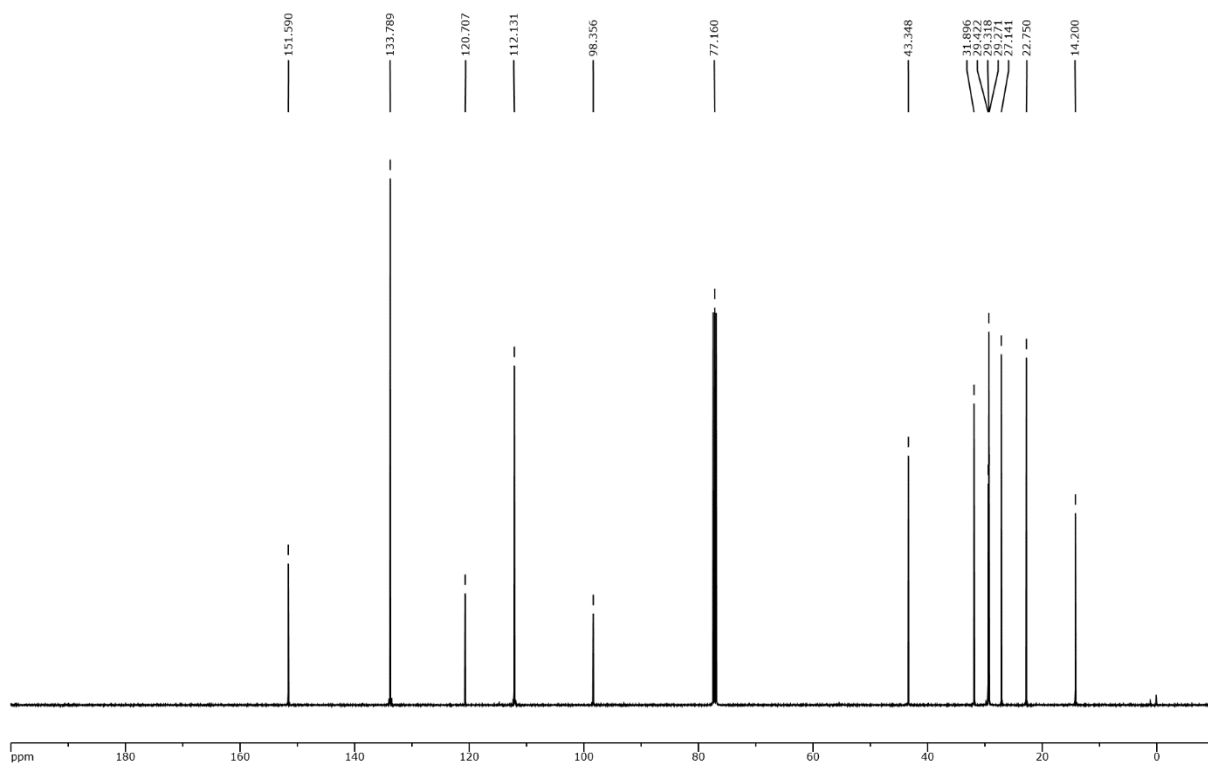

Fig. S42  $^{13}\text{C}$  NMR spectrum of compound **8a** (126 MHz,  $\text{CDCl}_3$ ).



## 6. Theoretical calculations

Computation method calculations were performed using Gaussian 16 program. Structures were optimized to stationary points which were determined to be local minima by performing frequency calculations and verifying the absence of imaginary frequencies. Single point and time-dependent DFT calculations were performed at the same level of theory as the geometry optimizations.

Full Gaussian Citation:

Gaussian 16, Revision C.02, M. J. Frisch, G. W. Trucks, H. B. Schlegel, G. E. Scuseria, M. A. Robb, J. R. Cheeseman, G. Scalmani, V. Barone, G. A. Petersson, H. Nakatsuji, X. Li, M. Caricato, A. V. Marenich, J. Bloino, B. G. Janesko, R. Gomperts, B. Mennucci, H. P. Hratchian, J. V. Ortiz, A. F. Izmaylov, J. L. Sonnenberg, D. Williams-Young, F. Ding, F. Lipparini, F. Egidi, J. Goings, B. Peng, A. Petrone, T. Henderson, D. Ranasinghe, V. G. Zakrzewski, J. Gao, N. Rega, G. Zheng, W. Liang, M. Hada, M. Ehara, K. Toyota, R. Fukuda, J. Hasegawa, M. Ishida, T. Nakajima, Y. Honda, O. Kitao, H. Nakai, T. Vreven, K. Throssell, J. A. Montgomery, Jr., J. E. Peralta, F. Ogliaro, M. J. Bearpark, J. J. Heyd, E. N. Brothers, K. N. Kudin, V. N. Staroverov, T. A. Keith, R. Kobayashi, J. Normand, K. Raghavachari, A. P. Rendell, J. C. Burant, S. S. Iyengar, J. Tomasi, M. Cossi, J. M. Millam, M. Klene, C. Adamo, R. Cammi, J. W. Ochterski, R. L. Martin, K. Morokuma, O. Farkas, J. B. Foresman, and D. J. Fox, Gaussian, Inc., Wallingford CT, 2019.

### 6.1 Theoretical calculation for L1

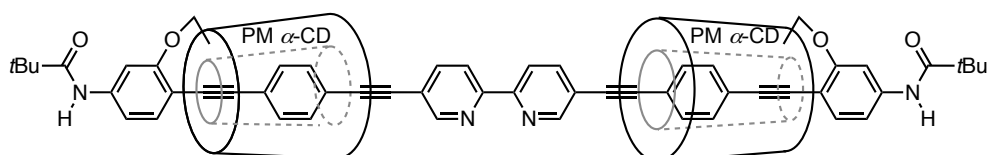

DFT calculation for **L1** was performed using the B3LYP hybrid density functional and 6-31G\*\* basis set. Details of the optimized geometries are presented in Table S1.

Table S1 Optimized structural coordinates of **L1**.

| Atom Number | Atomic Symbol | Coordinates (Angstroms) |          |           | 6  | O | 13.066368 | 0.701406  | -4.932725 |
|-------------|---------------|-------------------------|----------|-----------|----|---|-----------|-----------|-----------|
|             |               | X                       | Y        | Z         |    |   |           |           |           |
| 1           | O             | 14.679252               | 2.256388 | -0.822591 | 8  | O | 9.554332  | -1.188783 | -5.888450 |
| 2           | O             | 13.072154               | 4.433788 | -1.443999 | 9  | O | 15.135775 | -0.595392 | -3.545084 |
| 3           | O             | 9.811380                | 6.050484 | -1.922320 | 10 | O | 11.246399 | -2.338379 | -3.853257 |
| 4           | O             | 10.202181               | 4.527380 | -4.312314 | 11 | O | 12.633745 | -4.166120 | -3.368443 |
| 5           | O             | 11.518941               | 2.025598 | -3.761417 | 12 | O | 9.204651  | -4.162243 | -4.599008 |

|    |   |           |           |           |    |   |           |           |           |
|----|---|-----------|-----------|-----------|----|---|-----------|-----------|-----------|
| 13 | O | 8.964537  | -5.494076 | -2.076297 | 50 | C | 9.976333  | -4.524042 | -2.334736 |
| 14 | O | 13.886252 | -6.050650 | -1.454590 | 51 | C | 11.199666 | -4.823204 | -1.461537 |
| 15 | O | 10.873372 | -4.427904 | -0.118407 | 52 | C | 12.467993 | -4.078601 | -1.938756 |
| 16 | O | 12.328913 | -4.843371 | 1.685645  | 53 | C | 13.742109 | -4.646258 | -1.310680 |
| 17 | O | 8.808301  | -5.817866 | 1.278148  | 54 | C | 8.588150  | -5.207413 | -5.333975 |
| 18 | O | 8.779712  | -4.320094 | 3.684107  | 55 | C | 7.708626  | -4.952222 | -1.688302 |
| 19 | O | 13.605289 | -4.104620 | 4.182696  | 56 | C | 14.503688 | -6.479710 | -2.658463 |
| 20 | O | 10.694104 | -2.147707 | 3.620040  | 57 | C | 11.204052 | -5.288056 | 0.955008  |
| 21 | O | 12.252842 | -0.910927 | 4.874287  | 58 | C | 10.004052 | -5.412092 | 1.916471  |
| 22 | O | 8.686712  | -1.519612 | 5.540351  | 59 | C | 9.714991  | -4.091921 | 2.638653  |
| 23 | O | 8.872250  | 1.312059  | 5.530033  | 60 | C | 10.982486 | -3.505415 | 3.264727  |
| 24 | O | 13.797813 | 1.405738  | 5.453218  | 61 | C | 12.195008 | -3.554972 | 2.312205  |
| 25 | O | 10.842949 | 2.280677  | 3.652036  | 62 | C | 13.508652 | -3.283113 | 3.033240  |
| 26 | O | 12.438725 | 3.993668  | 3.445698  | 63 | C | 8.767819  | -7.183968 | 0.899704  |
| 27 | O | 8.877171  | 4.262459  | 4.144207  | 64 | C | 7.465248  | -3.852466 | 3.415693  |
| 28 | O | 9.124241  | 5.628405  | 1.645910  | 65 | C | 14.713839 | -3.769485 | 4.993747  |
| 29 | O | 13.984653 | 5.832292  | 1.796625  | 66 | C | 11.070567 | -1.691420 | 4.898960  |
| 30 | O | 11.189418 | 4.454095  | -0.028222 | 67 | C | 9.933078  | -0.851133 | 5.514574  |
| 31 | C | 11.931810 | 5.147964  | -1.001241 | 68 | C | 9.731777  | 0.475133  | 4.772662  |
| 32 | C | 11.049486 | 5.439169  | -2.234871 | 69 | C | 11.059127 | 1.216851  | 4.592069  |
| 33 | C | 10.736432 | 4.170795  | -3.044632 | 70 | C | 12.177589 | 0.287560  | 4.081046  |
| 34 | C | 11.978564 | 3.298030  | -3.288578 | 71 | C | 13.551949 | 0.936004  | 4.140202  |
| 35 | C | 12.783053 | 3.135181  | -1.986961 | 72 | C | 8.580484  | -2.537573 | 6.521243  |
| 36 | C | 14.122542 | 2.437910  | -2.143050 | 73 | C | 7.550648  | 1.422615  | 5.027430  |
| 37 | C | 9.907924  | 7.364684  | -1.394518 | 74 | C | 14.958201 | 2.207379  | 5.535786  |
| 38 | C | 8.781013  | 4.477658  | -4.386060 | 75 | C | 11.204791 | 3.590153  | 4.017535  |
| 39 | C | 11.961098 | 1.581416  | -5.020165 | 76 | C | 10.127623 | 4.582659  | 3.558474  |
| 40 | C | 10.825179 | 0.855284  | -5.765511 | 77 | C | 10.014392 | 4.581723  | 2.033287  |
| 41 | C | 10.428443 | -0.443578 | -5.057594 | 78 | C | 11.375037 | 4.792951  | 1.362033  |
| 42 | C | 11.655388 | -1.321253 | -4.779745 | 79 | C | 12.500480 | 3.947392  | 2.007588  |
| 43 | C | 12.839786 | -0.516641 | -4.201435 | 80 | C | 13.900105 | 4.421410  | 1.635079  |
| 44 | C | 14.148967 | -1.284009 | -4.290716 | 81 | C | 8.199311  | 5.365961  | 4.722322  |
| 45 | C | 9.728395  | 2.553248  | -7.017573 | 82 | C | 8.017558  | 5.210066  | 0.859811  |
| 46 | C | 8.190876  | -1.164227 | -5.495058 | 83 | H | 14.019353 | 1.483371  | -2.657480 |
| 47 | C | 16.422241 | -1.154854 | -3.696514 | 84 | H | 14.810353 | 3.070819  | -2.717623 |
| 48 | C | 11.536488 | -3.682439 | -4.133588 | 85 | H | 8.906621  | 7.799008  | -1.444857 |
| 49 | C | 10.321621 | -4.567266 | -3.825295 | 86 | H | 10.592333 | 7.987667  | -1.989028 |

|     |   |           |           |           |     |   |           |           |           |
|-----|---|-----------|-----------|-----------|-----|---|-----------|-----------|-----------|
| 87  | H | 10.230376 | 7.362301  | -0.346260 | 124 | H | 14.313174 | 0.196959  | 3.842382  |
| 88  | H | 8.508945  | 4.855936  | -5.374771 | 125 | H | 13.582208 | 1.765102  | 3.423350  |
| 89  | H | 8.318898  | 5.110133  | -3.622067 | 126 | H | 9.139299  | -3.439450 | 6.242514  |
| 90  | H | 8.421771  | 3.445074  | -4.291556 | 127 | H | 7.521901  | -2.799578 | 6.591055  |
| 91  | H | 14.013583 | -2.306223 | -3.911636 | 128 | H | 8.920630  | -2.183536 | 7.505870  |
| 92  | H | 14.442010 | -1.345811 | -5.352711 | 129 | H | 7.003370  | 2.055698  | 5.731469  |
| 93  | H | 8.720842  | 2.950393  | -7.159280 | 130 | H | 7.058331  | 0.444631  | 4.969418  |
| 94  | H | 10.043333 | 2.052769  | -7.944994 | 131 | H | 7.539294  | 1.907585  | 4.043367  |
| 95  | H | 10.405504 | 3.390947  | -6.807555 | 132 | H | 15.069147 | 2.508331  | 6.580607  |
| 96  | H | 7.797872  | -0.141271 | -5.470439 | 133 | H | 14.870165 | 3.107680  | 4.910764  |
| 97  | H | 8.050967  | -1.642669 | -4.517817 | 134 | H | 15.861193 | 1.654032  | 5.231570  |
| 98  | H | 7.641831  | -1.740072 | -6.244978 | 135 | H | 14.128958 | 4.134696  | 0.604475  |
| 99  | H | 16.458713 | -2.199995 | -3.349526 | 136 | H | 7.255736  | 4.982473  | 5.118561  |
| 100 | H | 17.106432 | -0.557815 | -3.090911 | 137 | H | 7.992117  | 6.147528  | 3.981785  |
| 101 | H | 16.754837 | -1.130034 | -4.746374 | 138 | H | 8.772444  | 5.806096  | 5.552435  |
| 102 | H | 14.610298 | -4.116851 | -1.730209 | 139 | H | 7.373768  | 6.085485  | 0.734760  |
| 103 | H | 13.701141 | -4.462666 | -0.233998 | 140 | H | 7.442160  | 4.423350  | 1.366557  |
| 104 | H | 8.224092  | -6.005100 | -4.675006 | 141 | H | 8.337211  | 4.866196  | -0.130318 |
| 105 | H | 9.273781  | -5.644664 | -6.075341 | 142 | H | 12.333377 | 6.072434  | -0.573877 |
| 106 | H | 7.742701  | -4.762768 | -5.864321 | 143 | H | 11.641338 | 6.106551  | -2.882579 |
| 107 | H | 7.003195  | -5.787317 | -1.659627 | 144 | H | 10.016300 | 3.561709  | -2.482790 |
| 108 | H | 7.350051  | -4.211735 | -2.413951 | 145 | H | 12.604141 | 3.782024  | -4.051249 |
| 109 | H | 7.763104  | -4.508915 | -0.687676 | 146 | H | 12.186500 | 2.560084  | -1.274333 |
| 110 | H | 15.475998 | -5.984715 | -2.805364 | 147 | H | 12.327878 | 2.428717  | -5.610139 |
| 111 | H | 13.881983 | -6.286219 | -3.538780 | 148 | H | 11.235018 | 0.580721  | -6.750673 |
| 112 | H | 14.671458 | -7.555327 | -2.557648 | 149 | H | 9.954645  | -0.198300 | -4.098632 |
| 113 | H | 14.342747 | -3.489344 | 2.343388  | 150 | H | 11.950777 | -1.785789 | -5.731200 |
| 114 | H | 13.544074 | -2.224811 | 3.318212  | 151 | H | 12.614757 | -0.288645 | -3.152716 |
| 115 | H | 9.398094  | -7.390932 | 0.025841  | 152 | H | 11.836491 | -3.800996 | -5.180652 |
| 116 | H | 7.731983  | -7.407235 | 0.633692  | 153 | H | 10.612821 | -5.594950 | -4.082099 |
| 117 | H | 9.068225  | -7.839059 | 1.730469  | 154 | H | 9.615277  | -3.516119 | -2.101612 |
| 118 | H | 7.445467  | -2.759363 | 3.326699  | 155 | H | 11.394150 | -5.901616 | -1.494902 |
| 119 | H | 6.850801  | -4.143939 | 4.271593  | 156 | H | 12.378461 | -3.022842 | -1.649332 |
| 120 | H | 7.053266  | -4.313429 | 2.510431  | 157 | H | 11.498707 | -6.267254 | 0.564112  |
| 121 | H | 15.666802 | -3.902084 | 4.456945  | 158 | H | 10.292331 | -6.153900 | 2.678222  |
| 122 | H | 14.701067 | -4.444402 | 5.852993  | 159 | H | 9.317939  | -3.368205 | 1.916750  |
| 123 | H | 14.652411 | -2.730917 | 5.349584  | 160 | H | 11.220533 | -4.088232 | 4.160606  |

|     |   |           |           |           |     |   |           |           |           |
|-----|---|-----------|-----------|-----------|-----|---|-----------|-----------|-----------|
| 161 | H | 12.062280 | -2.783654 | 1.541664  | 198 | C | 17.281112 | -0.181653 | -0.033430 |
| 162 | H | 11.317760 | -2.543165 | 5.541007  | 199 | H | 17.219162 | 1.884825  | -0.660836 |
| 163 | H | 10.249065 | -0.609137 | 6.542195  | 200 | H | 14.532488 | -2.133075 | 0.422296  |
| 164 | H | 9.308987  | 0.267166  | 3.781146  | 201 | H | 16.984109 | -2.242503 | 0.562881  |
| 165 | H | 11.361308 | 1.628509  | 5.560483  | 202 | N | 18.677166 | -0.308587 | 0.083851  |
| 166 | H | 11.965968 | 0.025719  | 3.035614  | 203 | C | 21.108737 | 0.123652  | 0.096373  |
| 167 | H | 11.349215 | 3.659233  | 5.100043  | 204 | O | 19.424647 | 1.763208  | -0.542066 |
| 168 | H | 10.462793 | 5.576259  | 3.885960  | 205 | C | 11.811140 | -0.004713 | -0.187725 |
| 169 | H | 9.614373  | 3.606608  | 1.733399  | 206 | C | 13.031179 | -0.020318 | -0.203050 |
| 170 | H | 11.638157 | 5.852361  | 1.447833  | 207 | C | 6.135719  | 0.112623  | -0.222983 |
| 171 | H | 12.386565 | 2.909301  | 1.669197  | 208 | C | 4.918240  | 0.135676  | -0.232470 |
| 172 | H | 14.618428 | 3.917279  | 2.300331  | 209 | H | 0.772721  | 2.200488  | -0.247311 |
| 173 | C | 2.762376  | 1.353441  | -0.242731 | 210 | C | 21.416154 | -1.090473 | -0.809533 |
| 174 | C | 3.499826  | 0.153161  | -0.239926 | 211 | C | 22.078312 | 1.268238  | -0.238867 |
| 175 | C | 2.759140  | -1.049721 | -0.243015 | 212 | C | 21.272133 | -0.269147 | 1.582572  |
| 176 | N | 1.432850  | -1.104726 | -0.247163 | 213 | H | 20.790582 | -1.960628 | -0.581689 |
| 177 | C | 0.739448  | 0.051419  | -0.247959 | 214 | H | 22.458101 | -1.398918 | -0.674925 |
| 178 | C | 1.377708  | 1.302309  | -0.246570 | 215 | H | 21.272898 | -0.842120 | -1.865817 |
| 179 | C | 7.556619  | 0.084836  | -0.210123 | 216 | H | 21.979933 | 1.574992  | -1.282817 |
| 180 | C | 8.303129  | 1.281114  | -0.224879 | 217 | H | 23.109205 | 0.943483  | -0.064857 |
| 181 | C | 9.690079  | 1.254915  | -0.211255 | 218 | H | 21.878927 | 2.146584  | 0.379124  |
| 182 | C | 10.386008 | 0.027223  | -0.187123 | 219 | H | 20.636734 | -1.113981 | 1.870044  |
| 183 | C | 9.640849  | -1.170775 | -0.166593 | 220 | H | 21.030450 | 0.570551  | 2.241527  |
| 184 | C | 8.253844  | -1.140703 | -0.178414 | 221 | H | 22.309010 | -0.562474 | 1.777102  |
| 185 | H | 3.284531  | 2.304758  | -0.240506 | 222 | C | 15.269699 | 6.329019  | 1.487212  |
| 186 | H | 3.288387  | -2.000264 | -0.241224 | 223 | H | 15.239408 | 7.414070  | 1.615840  |
| 187 | H | 7.781343  | 2.231808  | -0.243489 | 224 | H | 16.038764 | 5.915110  | 2.158258  |
| 188 | H | 10.242478 | 2.187635  | -0.210363 | 225 | H | 15.559871 | 6.097900  | 0.450976  |
| 189 | H | 10.157383 | -2.123547 | -0.139830 | 226 | C | -0.739370 | -0.051151 | -0.247977 |
| 190 | H | 7.692606  | -2.068799 | -0.163867 | 227 | N | -1.432774 | 1.104994  | -0.247100 |
| 191 | C | 16.642386 | 1.002392  | -0.427524 | 228 | C | -1.377627 | -1.302042 | -0.246701 |
| 192 | H | 18.990222 | -1.216381 | 0.394364  | 229 | C | -2.759064 | 1.049987  | -0.242978 |
| 193 | C | 19.665039 | 0.627463  | -0.158681 | 230 | C | -2.762295 | -1.353176 | -0.242889 |
| 194 | C | 15.251899 | 1.052332  | -0.510693 | 231 | H | -0.772639 | -2.200220 | -0.247504 |
| 195 | C | 14.452988 | -0.072149 | -0.191221 | 232 | C | -3.499748 | -0.152897 | -0.240001 |
| 196 | C | 15.121309 | -1.255584 | 0.181908  | 233 | H | -3.288313 | 2.000529  | -0.241119 |
| 197 | C | 16.502789 | -1.315608 | 0.260776  | 234 | H | -3.284448 | -2.304494 | -0.240750 |

|     |   |            |           |           |     |   |            |           |           |
|-----|---|------------|-----------|-----------|-----|---|------------|-----------|-----------|
| 235 | C | -4.918162  | -0.135443 | -0.232561 | 272 | H | -12.604043 | -3.781775 | -4.051493 |
| 236 | C | -6.135642  | -0.112426 | -0.223079 | 273 | C | -21.108639 | -0.124159 | 0.096816  |
| 237 | C | -7.556542  | -0.084655 | -0.210221 | 274 | O | -19.424483 | -1.763592 | -0.541767 |
| 238 | C | -8.303017  | -1.280956 | -0.225011 | 275 | O | -11.189136 | -4.454055 | -0.028564 |
| 239 | C | -8.253803  | 1.140861  | -0.178469 | 276 | C | -11.049210 | -5.438947 | -2.235302 |
| 240 | C | -9.689968  | -1.254800 | -0.211365 | 277 | H | -12.333010 | -6.072422 | -0.574319 |
| 241 | H | -7.781205  | -2.231634 | -0.243658 | 278 | C | -11.961168 | -1.581072 | -5.020298 |
| 242 | C | -9.640809  | 1.170888  | -0.166626 | 279 | O | -10.202046 | -4.526951 | -4.312712 |
| 243 | H | -7.692595  | 2.068975  | -0.163900 | 280 | H | -10.016150 | -3.561399 | -2.483126 |
| 244 | C | -10.385933 | -0.027129 | -0.187179 | 281 | C | -21.416215 | 1.089947  | -0.809061 |
| 245 | H | -10.242334 | -2.187540 | -0.210500 | 282 | C | -22.078159 | -1.268813 | -0.238350 |
| 246 | H | -10.157377 | 2.123640  | -0.139823 | 283 | C | -21.271942 | 0.268622  | 1.583029  |
| 247 | C | -11.811066 | 0.004752  | -0.187737 | 284 | C | -11.374715 | -4.793030 | 1.361668  |
| 248 | C | -13.031106 | 0.020298  | -0.203006 | 285 | O | -9.811060  | -6.050215 | -1.922831 |
| 249 | C | -14.452917 | 0.072055  | -0.191106 | 286 | H | -11.641043 | -6.106317 | -2.883039 |
| 250 | C | -15.251776 | -1.052454 | -0.510613 | 287 | O | -13.066512 | -0.701164 | -4.932777 |
| 251 | C | -15.121288 | 1.255427  | 0.182128  | 288 | C | -10.825327 | -0.854792 | -5.765621 |
| 252 | O | -14.679066 | -2.256452 | -0.822610 | 289 | H | -12.327887 | -2.428368 | -5.610318 |
| 253 | C | -16.642263 | -1.002599 | -0.427383 | 290 | C | -8.780885  | -4.477111 | -4.386523 |
| 254 | C | -16.502769 | 1.315365  | 0.261061  | 291 | H | -20.790690 | 1.960148  | -0.581261 |
| 255 | H | -14.532508 | 2.132938  | 0.422545  | 292 | H | -22.458174 | 1.398314  | -0.674374 |
| 256 | C | -14.122434 | -2.437864 | -2.143116 | 293 | H | -21.273018 | 0.841610  | -1.865358 |
| 257 | C | -17.281040 | 0.181384  | -0.033186 | 294 | H | -21.979841 | -1.575558 | -1.282310 |
| 258 | H | -17.218999 | -1.885050 | -0.660725 | 295 | H | -23.109062 | -0.944132 | -0.064259 |
| 259 | H | -16.984130 | 2.242213  | 0.563247  | 296 | H | -21.878664 | -2.147147 | 0.379622  |
| 260 | C | -12.782904 | -3.135084 | -1.987154 | 297 | H | -20.636577 | 1.113497  | 1.870453  |
| 261 | H | -14.019316 | -1.483284 | -2.657487 | 298 | H | -21.030151 | -0.571062 | 2.241962  |
| 262 | H | -14.810252 | -3.070763 | -2.717690 | 299 | H | -22.308824 | 0.561879  | 1.777643  |
| 263 | N | -18.677096 | 0.308235  | 0.084153  | 300 | C | -10.014074 | -4.581795 | 2.032929  |
| 264 | O | -13.071912 | -4.433751 | -1.444285 | 301 | C | -12.500202 | -3.947581 | 2.007303  |
| 265 | C | -11.978466 | -3.297791 | -3.288816 | 302 | H | -11.637776 | -5.852460 | 1.447387  |
| 266 | H | -12.186348 | -2.560015 | -1.274505 | 303 | C | -9.907515  | -7.364474 | -1.395158 |
| 267 | H | -18.990191 | 1.215996  | 0.394723  | 304 | C | -12.840022 | 0.516848  | -4.201404 |
| 268 | C | -19.664925 | -0.627869 | -0.158353 | 305 | O | -9.660782  | -1.637891 | -5.935907 |
| 269 | C | -11.931513 | -5.147893 | -1.001621 | 306 | C | -10.428689 | 0.444052  | -5.057616 |
| 270 | O | -11.518943 | -2.025299 | -3.761588 | 307 | H | -11.235212 | -0.580195 | -6.750755 |
| 271 | C | -10.736265 | -4.170494 | -3.044980 | 308 | H | -8.508834  | -4.855309 | -5.375269 |

|     |   |            |           |           |     |   |            |           |           |
|-----|---|------------|-----------|-----------|-----|---|------------|-----------|-----------|
| 309 | H | -8.318682  | -5.109592 | -3.622587 | 346 | O | -10.842723 | -2.280895 | 3.651843  |
| 310 | H | -8.421721  | -3.444503 | -4.291978 | 347 | H | -11.348902 | -3.659572 | 5.099762  |
| 311 | O | -9.123872  | -5.628404 | 1.645474  | 348 | C | -15.269300 | -6.329354 | 1.486955  |
| 312 | C | -10.127301 | -4.582852 | 3.558118  | 349 | C | -11.536952 | 3.682756  | -4.133358 |
| 313 | H | -9.614093  | -3.606638 | 1.733124  | 350 | C | -16.422510 | 1.154734  | -3.696315 |
| 314 | O | -12.438425 | -3.993938 | 3.445409  | 351 | H | -7.798095  | 0.142001  | -5.470553 |
| 315 | C | -13.899804 | -4.421672 | 1.634798  | 352 | H | -8.051306  | 1.643279  | -4.517776 |
| 316 | H | -12.386360 | -2.909465 | 1.668969  | 353 | H | -7.642210  | 1.740894  | -6.244935 |
| 317 | H | -8.906195  | -7.798747 | -1.445590 | 354 | H | -7.255351  | -4.982709 | 5.118077  |
| 318 | H | -10.591925 | -7.987429 | -1.989696 | 355 | H | -7.991683  | -6.147636 | 3.981137  |
| 319 | H | -10.229923 | -7.362209 | -0.346885 | 356 | H | -8.771988  | -5.806509 | 5.551863  |
| 320 | C | -11.655700 | 1.321604  | -4.779681 | 357 | C | -11.059006 | -1.217137 | 4.591932  |
| 321 | C | -14.149271 | 1.284108  | -4.290603 | 358 | H | -15.238934 | -7.414411 | 1.615518  |
| 322 | H | -12.614953 | 0.288799  | -3.152705 | 359 | H | -16.038319 | -5.915527 | 2.158104  |
| 323 | C | -9.728436  | -2.552598 | -7.017806 | 360 | H | -15.559594 | -6.098194 | 0.450763  |
| 324 | O | -9.554656  | 1.189399  | -5.888428 | 361 | O | -12.634188 | 4.166329  | -3.368119 |
| 325 | H | -9.954853  | 0.198746  | -4.098680 | 362 | C | -10.322112 | 4.567628  | -3.825082 |
| 326 | C | -8.017270  | -5.209971 | 0.859309  | 363 | H | -11.837019 | 3.801358  | -5.180399 |
| 327 | O | -8.876867  | -4.262655 | 4.143885  | 364 | H | -16.459052 | 2.199849  | -3.349254 |
| 328 | C | -11.204499 | -3.590413 | 4.017256  | 365 | H | -17.106627 | 0.557598  | -3.090725 |
| 329 | H | -10.462445 | -5.576484 | 3.885534  | 366 | H | -16.755144 | 1.129960  | -4.746163 |
| 330 | O | -13.984251 | -5.832571 | 1.796264  | 367 | C | -9.731702  | -0.475371 | 4.772671  |
| 331 | H | -14.128706 | -4.134913 | 0.604218  | 368 | C | -12.177470 | -0.287863 | 4.080888  |
| 332 | H | -14.618143 | -3.917631 | 2.300101  | 369 | H | -11.361246 | -1.628868 | 5.560297  |
| 333 | O | -11.246771 | 2.338693  | -3.853127 | 370 | C | -12.468344 | 4.078718  | -1.938448 |
| 334 | H | -11.951146 | 1.786186  | -5.731096 | 371 | O | -9.205163  | 4.162721  | -4.598888 |
| 335 | O | -15.135993 | 0.595365  | -3.544972 | 372 | C | -9.976729  | 4.524318  | -2.334548 |
| 336 | H | -14.013966 | 2.306315  | -3.911477 | 373 | H | -10.613383 | 5.595313  | -4.081797 |
| 337 | H | -14.442356 | 1.345935  | -5.352584 | 374 | O | -8.872198  | -1.312315 | 5.530051  |
| 338 | H | -8.720843  | -2.949611 | -7.159598 | 375 | C | -9.933113  | 0.850839  | 5.514655  |
| 339 | H | -10.043494 | -2.052111 | -7.945183 | 376 | H | -9.308847  | -0.267322 | 3.781200  |
| 340 | H | -10.405429 | -3.390389 | -6.807785 | 377 | O | -12.252832 | 0.910565  | 4.874206  |
| 341 | C | -8.191191  | 1.164924  | -5.495064 | 378 | C | -13.551804 | -0.936376 | 4.139899  |
| 342 | H | -7.373437  | -6.085347 | 0.734184  | 379 | H | -11.965785 | -0.025940 | 3.035489  |
| 343 | H | -7.441880  | -4.423242 | 1.366048  | 380 | C | -11.200025 | 4.823351  | -1.461251 |
| 344 | H | -8.337010  | -4.866079 | -0.130782 | 381 | C | -13.742444 | 4.646268  | -1.310247 |
| 345 | C | -8.198910  | -5.366203 | 4.721803  | 382 | H | -12.378740 | 3.022944  | -1.649105 |

|     |   |            |           |           |     |   |            |           |           |
|-----|---|------------|-----------|-----------|-----|---|------------|-----------|-----------|
| 383 | C | -8.588842  | 5.207954  | -5.333916 | 417 | C | -10.982497 | 3.505229  | 3.264919  |
| 384 | O | -8.964978  | 5.494385  | -2.076076 | 418 | H | -15.069095 | -2.508911 | 6.580115  |
| 385 | H | -9.615612  | 3.516397  | -2.101511 | 419 | H | -14.869793 | -3.108255 | 4.910307  |
| 386 | C | -7.550530  | -1.422720 | 5.027584  | 420 | H | -15.861084 | -1.654753 | 5.230957  |
| 387 | O | -8.686772  | 1.519358  | 5.540572  | 421 | O | -12.329016 | 4.843302  | 1.686033  |
| 388 | C | -11.070601 | 1.691115  | 4.899018  | 422 | C | -10.004136 | 5.411987  | 1.916704  |
| 389 | H | -10.249164 | 0.608762  | 6.542239  | 423 | H | -11.498890 | 6.267257  | 0.564524  |
| 390 | O | -13.797771 | -1.406145 | 5.452884  | 424 | H | -15.476583 | 5.984700  | -2.804668 |
| 391 | H | -14.313041 | -0.197368 | 3.842018  | 425 | H | -13.882668 | 6.286318  | -3.538259 |
| 392 | H | -13.581947 | -1.765461 | 3.423028  | 426 | H | -14.672094 | 7.555342  | -2.556979 |
| 393 | O | -10.873648 | 4.427945  | -0.118175 | 427 | C | -9.715047  | 4.091773  | 2.638790  |
| 394 | H | -11.394571 | 5.901755  | -1.494515 | 428 | C | -12.195071 | 3.554840  | 2.312465  |
| 395 | O | -13.886680 | 6.050658  | -1.454080 | 429 | H | -11.220494 | 4.088005  | 4.160838  |
| 396 | H | -14.610637 | 4.116828  | -1.729724 | 430 | O | -8.808420  | 5.817764  | 1.278320  |
| 397 | H | -13.701373 | 4.462627  | -0.233576 | 431 | H | -10.292343 | 6.153760  | 2.678515  |
| 398 | H | -8.224817  | 6.005687  | -4.674982 | 432 | O | -8.779680  | 4.319901  | 3.684179  |
| 399 | H | -9.274583  | 5.645123  | -6.075228 | 433 | H | -9.318046  | 3.368103  | 1.916813  |
| 400 | H | -7.743386  | 4.763402  | -5.864329 | 434 | C | -13.508682 | 3.282908  | 3.033529  |
| 401 | C | -7.708951  | 4.952558  | -1.688411 | 435 | H | -12.062370 | 2.783598  | 1.541845  |
| 402 | H | -7.003279  | -2.055816 | 5.731632  | 436 | C | -8.767903  | 7.183905  | 0.900016  |
| 403 | H | -7.058288  | -0.444692 | 4.969708  | 437 | C | -7.465295  | 3.852076  | 3.415729  |
| 404 | H | -7.539031  | -1.907610 | 4.043483  | 438 | O | -13.605245 | 4.104264  | 4.183099  |
| 405 | C | -8.580712  | 2.537382  | 6.521419  | 439 | H | -14.342804 | 3.489252  | 2.343743  |
| 406 | O | -10.694054 | 2.147515  | 3.620160  | 440 | H | -13.544114 | 2.224571  | 3.318365  |
| 407 | H | -11.317887 | 2.542801  | 5.541106  | 441 | H | -9.398217  | 7.390984  | 0.026209  |
| 408 | C | -14.958050 | -2.207959 | 5.535304  | 442 | H | -7.732072  | 7.407159  | 0.633973  |
| 409 | C | -11.204212 | 5.288029  | 0.955326  | 443 | H | -9.068235  | 7.838920  | 1.730867  |
| 410 | C | -14.504280 | 6.479738  | -2.657861 | 444 | H | -7.445659  | 2.758965  | 3.326830  |
| 411 | H | -7.003554  | 5.787684  | -1.659817 | 445 | H | -6.850756  | 4.143550  | 4.271564  |
| 412 | H | -7.350501  | 4.212157  | -2.414206 | 446 | H | -7.053307  | 4.312912  | 2.510403  |
| 413 | H | -7.763194  | 4.509157  | -0.687813 | 447 | C | -14.713823 | 3.769113  | 4.994104  |
| 414 | H | -9.139445  | 3.439254  | 6.242514  | 448 | H | -15.666773 | 3.901864  | 4.457319  |
| 415 | H | -7.522134  | 2.799359  | 6.591428  | 449 | H | -14.700994 | 4.443910  | 5.853442  |
| 416 | H | -8.921063  | 2.183418  | 7.506002  | 450 | H | -14.652481 | 2.730491  | 5.349801  |

## 6.2 Theoretical calculation for $[\text{Ir}(\text{ppy})_2(\text{L3})]^+$

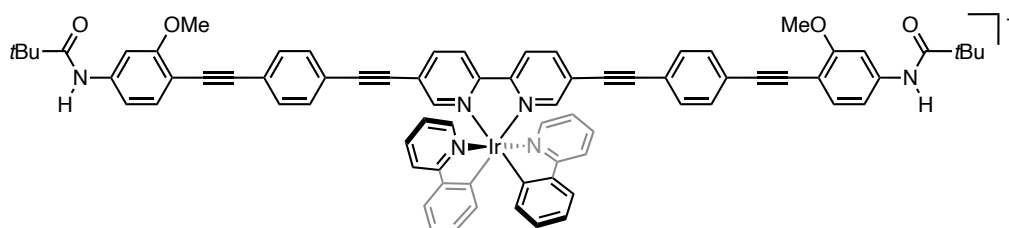

DFT and TD-DFT calculations for  $[\text{Ir}(\text{ppy})_2(\text{L3})]^+$  were performed using the CAM-B3LYP hybrid density functional with LANL2DZ (Ir) and 6-31+G\*\* (C, H, N, O) basis sets with PCM solvent model for  $\text{CH}_2\text{Cl}_2$ . Details of the optimized geometries are presented in Table S3.

Table S2 HOMO and LUMO distributions of  $[\text{Ir}(\text{ppy})_2(\text{L3})]^+$ .

| Orbital     | label | Energy     | Diagram |
|-------------|-------|------------|---------|
| Orbital 304 | HOMO  | -7.0284 eV |         |
| Orbital 305 | LUMO  | -2.2528 eV |         |

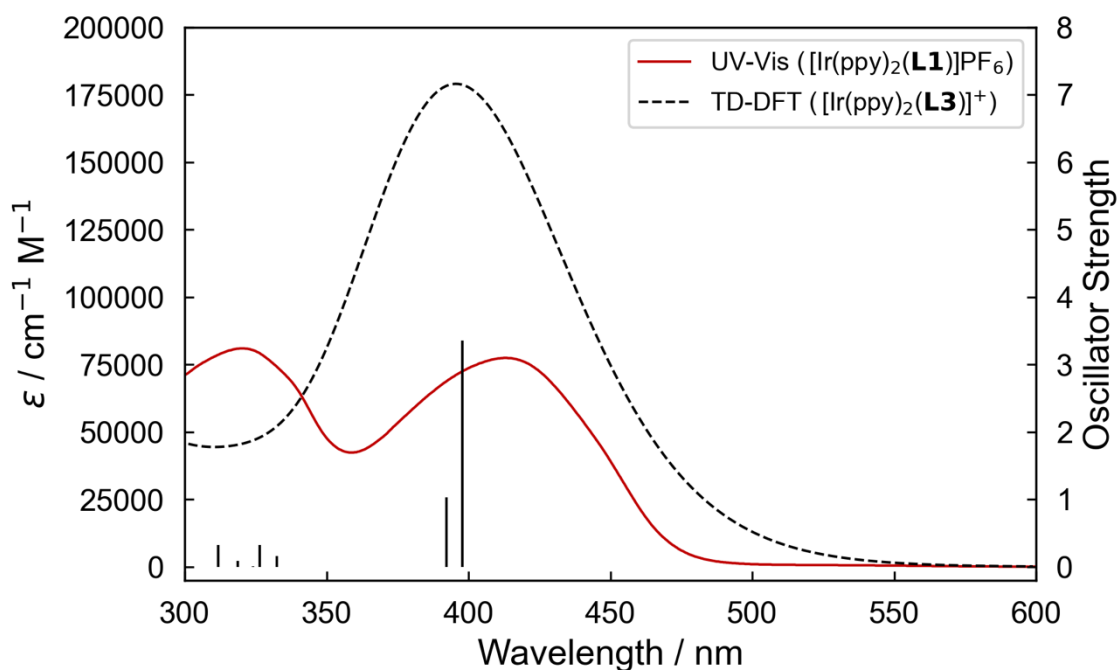

Fig. S43 Experimental and calculated UV/Visible spectra of  $[\text{Ir}(\text{ppy})_2(\text{L1})]\text{PF}_6$  (in  $\text{CH}_2\text{Cl}_2$ ,  $1 \times 10^{-5}$  M) and  $[\text{Ir}(\text{ppy})_2(\text{L3})]^+$ , respectively.



Table S3 Optimized structural coordinates of  $[\text{Ir}(\text{ppy})_2(\text{L3})]^+$ .

| Atom Number | Atomic Symbol | Coordinates (Angstroms) |           |           |    |    |           |           |           |
|-------------|---------------|-------------------------|-----------|-----------|----|----|-----------|-----------|-----------|
|             |               | X                       | Y         | Z         |    |    |           |           |           |
|             |               |                         |           |           | 35 | O  | 14.649438 | -2.851395 | 0.176111  |
|             |               |                         |           |           | 36 | C  | 6.116788  | -1.436803 | 0.023572  |
| 1           | C             | 2.879824                | -2.967146 | -0.010574 | 37 | C  | 4.913085  | -1.563047 | 0.025110  |
| 2           | C             | 3.497202                | -1.711732 | 0.025698  | 38 | H  | 1.023039  | -4.017744 | -0.045001 |
| 3           | C             | 2.668566                | -0.585361 | 0.060314  | 39 | C  | 21.161174 | 0.452633  | -1.468503 |
| 4           | N             | 1.338175                | -0.669015 | 0.063752  | 40 | C  | 22.040575 | -1.232120 | 0.164102  |
| 5           | C             | 0.737490                | -1.880034 | 0.031195  | 41 | C  | 21.142932 | 0.945868  | 1.007396  |
| 6           | C             | 1.498471                | -3.046854 | -0.008926 | 42 | H  | 20.454946 | 1.263240  | -1.669900 |
| 7           | C             | 7.536436                | -1.285080 | 0.022201  | 43 | H  | 22.170580 | 0.863656  | -1.562152 |
| 8           | C             | 8.372510                | -2.412022 | 0.046888  | 44 | H  | 21.033073 | -0.309532 | -2.242791 |
| 9           | C             | 9.749560                | -2.263834 | 0.045010  | 45 | H  | 21.958098 | -2.029742 | -0.577070 |
| 10          | C             | 10.329956               | -0.985232 | 0.017315  | 46 | H  | 23.036160 | -0.786257 | 0.085110  |
| 11          | C             | 9.491166                | 0.140876  | -0.007166 | 47 | H  | 21.942648 | -1.683018 | 1.154720  |
| 12          | C             | 8.113966                | -0.006338 | -0.004279 | 48 | H  | 20.474749 | 1.798002  | 0.851466  |
| 13          | H             | 3.481427                | -3.868137 | -0.042045 | 49 | H  | 20.961464 | 0.550617  | 2.011159  |
| 14          | H             | 3.089331                | 0.412938  | 0.086822  | 50 | H  | 22.165835 | 1.331860  | 0.976594  |
| 15          | H             | 7.933830                | -3.403692 | 0.067648  | 51 | Ir | 0.001112  | 1.059698  | 0.026071  |
| 16          | H             | 10.389387               | -3.139077 | 0.064131  | 52 | N  | 0.309540  | 1.167142  | -2.017535 |
| 17          | H             | 9.930035                | 1.132277  | -0.028267 | 53 | C  | -0.352028 | 0.434325  | -2.928220 |
| 18          | H             | 7.474508                | 0.869427  | -0.023034 | 54 | C  | 1.253780  | 2.057257  | -2.418957 |
| 19          | C             | 16.621662               | -1.464175 | 0.073196  | 55 | C  | -0.111014 | 0.542644  | -4.284525 |
| 20          | H             | 18.777252               | 1.054952  | -0.135819 | 56 | H  | -1.097483 | -0.248927 | -2.542259 |
| 21          | C             | 19.588089               | -0.796685 | 0.032348  | 57 | C  | 1.538278  | 2.204948  | -3.778300 |
| 22          | C             | 15.238990               | -1.637664 | 0.084526  | 58 | C  | 0.856803  | 1.447490  | -4.715409 |
| 23          | C             | 14.368192               | -0.531187 | -0.001069 | 59 | H  | -0.671826 | -0.068064 | -4.981393 |
| 24          | C             | 14.933466               | 0.746686  | -0.096949 | 60 | H  | 2.290558  | 2.915816  | -4.095250 |
| 25          | C             | 16.303987               | 0.931844  | -0.109715 | 61 | H  | 1.074433  | 1.561471  | -5.771920 |
| 26          | C             | 17.156341               | -0.176330 | -0.025039 | 62 | N  | -0.307297 | 1.178869  | 2.069053  |
| 27          | H             | 17.293614               | -2.303623 | 0.138835  | 63 | C  | 0.351877  | 0.448910  | 2.983780  |
| 28          | H             | 14.274129               | 1.605308  | -0.162914 | 64 | C  | -1.249222 | 2.073660  | 2.465525  |
| 29          | H             | 16.714935               | 1.933639  | -0.185187 | 65 | C  | 0.110819  | 0.565078  | 4.339429  |
| 30          | N             | 18.537177               | 0.078312  | -0.047672 | 66 | H  | 1.095430  | -0.238610 | 2.601714  |
| 31          | C             | 20.981904               | -0.149848 | -0.061971 | 67 | C  | -1.533616 | 2.229345  | 3.823998  |
| 32          | O             | 19.430651               | -2.007105 | 0.153876  | 68 | C  | -0.854495 | 1.474958  | 4.765282  |
| 33          | C             | 11.749503               | -0.833297 | 0.013053  | 69 | H  | 0.669683  | -0.043578 | 5.039646  |
| 34          | C             | 12.954382               | -0.707455 | 0.008349  | 70 | H  | -2.284036 | 2.943922  | 4.136985  |

|     |   |           |           |           |     |   |            |           |           |
|-----|---|-----------|-----------|-----------|-----|---|------------|-----------|-----------|
| 71  | H | -1.072055 | 1.595134  | 5.821117  | 108 | C | -9.493901  | 0.152974  | 0.006722  |
| 72  | C | 1.413444  | 2.493469  | -0.031388 | 109 | H | -7.477171  | 0.881411  | 0.018975  |
| 73  | C | 1.990423  | 3.183557  | 1.041806  | 110 | C | -10.332829 | -0.973276 | 0.002240  |
| 74  | C | 1.889698  | 2.800609  | -1.325780 | 111 | H | -10.392567 | -3.127621 | 0.005484  |
| 75  | C | 2.995225  | 4.127374  | 0.842303  | 112 | H | -9.932585  | 1.144669  | 0.001860  |
| 76  | H | 1.654408  | 2.987695  | 2.055421  | 113 | C | -11.752354 | -0.821621 | -0.009441 |
| 77  | C | 2.899143  | 3.748658  | -1.528536 | 114 | C | -12.957339 | -0.697204 | -0.020797 |
| 78  | C | 3.454163  | 4.414003  | -0.444177 | 115 | C | -14.371529 | -0.524460 | -0.034389 |
| 79  | H | 3.423381  | 4.646463  | 1.695181  | 116 | C | -15.238475 | -1.636064 | -0.086540 |
| 80  | H | 3.257736  | 3.974027  | -2.527771 | 117 | C | -14.941122 | 0.754567  | 0.002383  |
| 81  | H | 4.236358  | 5.150066  | -0.598290 | 118 | C | -16.621525 | -1.466225 | -0.101353 |
| 82  | C | -1.407702 | 2.497245  | 0.075609  | 119 | O | -14.644971 | -2.850856 | -0.120910 |
| 83  | C | -1.982800 | 3.183040  | -1.001344 | 120 | C | -16.312135 | 0.936185  | -0.011596 |
| 84  | C | -1.883098 | 2.812767  | 1.368293  | 121 | H | -14.284787 | 1.617074  | 0.042541  |
| 85  | C | -2.984999 | 4.130694  | -0.807014 | 122 | C | -17.160579 | -0.176981 | -0.064075 |
| 86  | H | -1.647319 | 2.980754  | -2.013868 | 123 | H | -17.290500 | -2.309618 | -0.141636 |
| 87  | C | -2.889945 | 3.764672  | 1.565854  | 124 | H | -16.726351 | 1.939066  | 0.017326  |
| 88  | C | -3.443150 | 4.425600  | 0.477873  | 125 | N | -18.542148 | 0.073929  | -0.076316 |
| 89  | H | -3.411705 | 4.646312  | -1.662724 | 126 | H | -18.786702 | 1.052898  | -0.041668 |
| 90  | H | -3.247925 | 3.996472  | 2.563838  | 127 | C | -19.589729 | -0.807161 | -0.130722 |
| 91  | H | -4.223317 | 5.164641  | 0.627951  | 128 | C | -20.985095 | -0.156894 | -0.125774 |
| 92  | C | -0.741311 | -1.878488 | 0.038436  | 129 | O | -19.428234 | -2.022146 | -0.178044 |
| 93  | N | -1.339570 | -0.666497 | -0.001997 | 130 | C | -21.180135 | 0.641062  | 1.176954  |
| 94  | C | -1.504662 | -3.043506 | 0.085406  | 131 | C | -22.041558 | -1.261699 | -0.203375 |
| 95  | C | -2.669809 | -0.580204 | -0.000474 | 132 | C | -21.132645 | 0.772897  | -1.344596 |
| 96  | C | -2.885845 | -2.961081 | 0.085079  | 133 | H | -20.488239 | 1.483762  | 1.264536  |
| 97  | H | -1.031164 | -4.015072 | 0.127973  | 134 | H | -22.195151 | 1.047895  | 1.204404  |
| 98  | C | -3.500705 | -1.704714 | 0.039828  | 135 | H | -21.048449 | 0.001654  | 2.054803  |
| 99  | H | -3.088566 | 0.418744  | -0.033630 | 136 | H | -21.965415 | -1.944728 | 0.645636  |
| 100 | H | -3.489271 | -3.860676 | 0.121341  | 137 | H | -23.037721 | -0.810304 | -0.196210 |
| 101 | C | -4.916308 | -1.553536 | 0.035660  | 138 | H | -21.935479 | -1.849979 | -1.117747 |
| 102 | C | -6.119855 | -1.425884 | 0.030691  | 139 | H | -20.446078 | 1.624014  | -1.314765 |
| 103 | C | -7.539410 | -1.273563 | 0.022426  | 140 | H | -20.959626 | 0.230303  | -2.278670 |
| 104 | C | -8.375655 | -2.400656 | 0.018922  | 141 | H | -22.148956 | 1.176401  | -1.371597 |
| 105 | C | -8.116734 | 0.005527  | 0.016313  | 142 | C | 15.470024  | -4.010506 | 0.266315  |
| 106 | C | -9.752619 | -2.252265 | 0.008642  | 143 | H | 16.100051  | -4.116923 | -0.621979 |
| 107 | H | -7.937148 | -3.392606 | 0.023789  | 144 | H | 16.097153  | -3.980087 | 1.162484  |

|     |   |            |           |           |     |   |            |           |           |
|-----|---|------------|-----------|-----------|-----|---|------------|-----------|-----------|
| 145 | H | 14.783757  | -4.853592 | 0.329841  | 148 | H | -16.075215 | -4.021443 | -1.083748 |
| 146 | C | -15.461391 | -4.015040 | -0.177885 | 149 | H | -14.772182 | -4.857875 | -0.198419 |
| 147 | H | -16.104200 | -4.088877 | 0.704562  |     |   |            |           |           |

### 6.3 Theoretical calculation for NiCl<sub>2</sub>(L3)

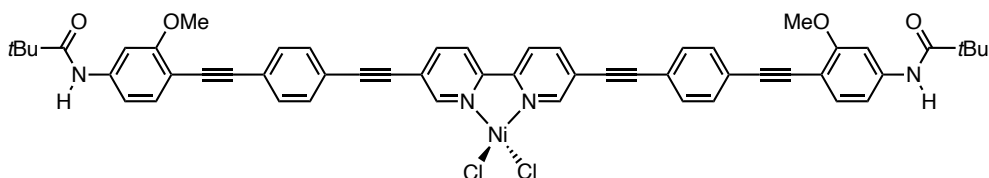

DFT and TD-DFT calculations for NiCl<sub>2</sub>(L3) were performed using the CAM-UB3LYP hybrid density functional with LANL2DZ (Ni) and 6-31+G\*\* (C, H, N, O, Cl) basis sets with PCM solvent model for DMF. Details of the optimized geometries are presented in Table S5.

Table S4 HOMO and LUMO distributions of NiCl<sub>2</sub>(L3).

| Orbital             | label          | Energy     | Diagram |
|---------------------|----------------|------------|---------|
| Orbital 242 (242A)  | $\alpha$ -HOMO | -6.9340 eV |         |
| Orbital 1630 (240B) | $\beta$ -HOMO  | -6.9343 eV |         |
| Orbital 243 (243A)  | $\alpha$ -LUMO | -2.0234 eV |         |
| Orbital 1631 (241B) | $\beta$ -LUMO  | -2.006 eV  |         |

Table S5 Optimized structural coordinates of NiCl<sub>2</sub>(L3).

| Atom Number | Atomic Symbol | Coordinates (Angstroms) |          |           |    |   |           |          |           |
|-------------|---------------|-------------------------|----------|-----------|----|---|-----------|----------|-----------|
|             |               | X                       | Y        | Z         |    |   |           |          |           |
| 1           | Ni            | 0.000000                | 0.000000 | 1.473267  | 7  | C | 0.012110  | 1.518716 | -2.461988 |
| 2           | N             | -0.027280               | 1.317917 | -0.092879 | 8  | C | 0.003035  | 2.899090 | -2.349359 |
| 3           | C             | -0.036865               | 2.641000 | 0.028257  | 9  | C | -0.029212 | 4.906327 | -0.907857 |
| 4           | C             | -0.004741               | 0.739911 | -1.308175 | 10 | H | 0.037210  | 1.061974 | -3.442372 |
| 5           | C             | -0.023275               | 3.492926 | -1.081832 | 11 | H | 0.018201  | 3.520048 | -3.237622 |
| 6           | H             | -0.052943               | 3.040362 | 1.036338  | 12 | C | -0.031403 | 6.107710 | -0.762606 |
|             |               |                         |          |           | 13 | C | -0.031130 | 7.524454 | -0.583027 |
|             |               |                         |          |           | 14 | C | 0.029831  | 8.382835 | -1.691749 |

|    |   |           |           |           |    |   |           |            |           |
|----|---|-----------|-----------|-----------|----|---|-----------|------------|-----------|
| 15 | C | -0.089339 | 8.076333  | 0.705939  | 52 | N | 0.027280  | -1.317917  | -0.092879 |
| 16 | C | 0.034115  | 9.756829  | -1.515606 | 53 | C | 0.036865  | -2.641000  | 0.028257  |
| 17 | H | 0.075279  | 7.964076  | -2.691127 | 54 | C | 0.004741  | -0.739911  | -1.308175 |
| 18 | C | -0.085813 | 9.450385  | 0.881153  | 55 | C | 0.023275  | -3.492926  | -1.081832 |
| 19 | H | -0.136467 | 7.419785  | 1.567840  | 56 | H | 0.052943  | -3.040362  | 1.036338  |
| 20 | C | -0.023484 | 10.311310 | -0.226568 | 57 | C | -0.012110 | -1.518716  | -2.461988 |
| 21 | H | 0.082574  | 10.413178 | -2.377477 | 58 | C | -0.003035 | -2.899090  | -2.349359 |
| 22 | H | -0.130231 | 9.868841  | 1.880605  | 59 | C | 0.029212  | -4.906327  | -0.907857 |
| 23 | C | -0.016553 | 11.727864 | -0.044262 | 60 | H | -0.037210 | -1.061974  | -3.442372 |
| 24 | C | -0.008891 | 12.929183 | 0.113345  | 61 | H | -0.018201 | -3.520048  | -3.237622 |
| 25 | C | -0.002028 | 14.337958 | 0.328682  | 62 | C | 0.031403  | -6.107710  | -0.762606 |
| 26 | C | 0.098133  | 15.238597 | -0.752289 | 63 | C | 0.031130  | -7.524454  | -0.583027 |
| 27 | C | -0.093283 | 14.867822 | 1.622263  | 64 | C | -0.029831 | -8.382835  | -1.691749 |
| 28 | O | 0.184616  | 14.682428 | -1.982739 | 65 | C | 0.089339  | -8.076333  | 0.705939  |
| 29 | C | 0.105849  | 16.616111 | -0.539429 | 66 | C | -0.034115 | -9.756829  | -1.515606 |
| 30 | C | -0.086950 | 16.232428 | 1.846398  | 67 | H | -0.075279 | -7.964076  | -2.691127 |
| 31 | H | -0.170678 | 14.185437 | 2.461703  | 68 | C | 0.085813  | -9.450385  | 0.881153  |
| 32 | C | 0.013391  | 17.114974 | 0.763367  | 69 | H | 0.136467  | -7.419785  | 1.567840  |
| 33 | H | 0.181698  | 17.310090 | -1.359791 | 70 | C | 0.023484  | -10.311310 | -0.226568 |
| 34 | H | -0.159355 | 16.616457 | 2.858849  | 71 | H | -0.082574 | -10.413178 | -2.377477 |
| 35 | N | 0.016553  | 18.487645 | 1.059733  | 72 | H | 0.130231  | -9.868841  | 1.880605  |
| 36 | H | -0.051345 | 18.698519 | 2.045056  | 73 | C | 0.016553  | -11.727864 | -0.044262 |
| 37 | C | 0.093285  | 19.563510 | 0.217319  | 74 | C | 0.008891  | -12.929183 | 0.113345  |
| 38 | C | 0.067237  | 20.935853 | 0.913996  | 75 | C | 0.002028  | -14.337958 | 0.328682  |
| 39 | O | 0.178034  | 19.442858 | -1.001651 | 76 | C | -0.098133 | -15.238597 | -0.752289 |
| 40 | C | 1.281722  | 21.062786 | 1.852838  | 77 | C | 0.093283  | -14.867822 | 1.622263  |
| 41 | C | 0.137541  | 22.031344 | -0.152721 | 78 | O | -0.184616 | -14.682428 | -1.982739 |
| 42 | C | -1.239590 | 21.091231 | 1.713786  | 79 | C | -0.105849 | -16.616111 | -0.539429 |
| 43 | H | 1.255360  | 20.345006 | 2.677710  | 80 | C | 0.086950  | -16.232428 | 1.846398  |
| 44 | H | 1.296212  | 22.064395 | 2.292186  | 81 | H | 0.170678  | -14.185437 | 2.461703  |
| 45 | H | 2.219157  | 20.919100 | 1.307376  | 82 | C | -0.013391 | -17.114974 | 0.763367  |
| 46 | H | 1.054118  | 21.955385 | -0.742165 | 83 | H | -0.181698 | -17.310090 | -1.359791 |
| 47 | H | 0.120570  | 23.010409 | 0.334283  | 84 | H | 0.159355  | -16.616457 | 2.858849  |
| 48 | H | -0.710554 | 21.973418 | -0.839031 | 85 | N | -0.016553 | -18.487645 | 1.059733  |
| 49 | H | -1.321505 | 20.374405 | 2.535797  | 86 | H | 0.051345  | -18.698519 | 2.045056  |
| 50 | H | -2.114647 | 20.969439 | 1.068523  | 87 | C | -0.093285 | -19.563510 | 0.217319  |
| 51 | H | -1.278708 | 22.093086 | 2.150963  | 88 | C | -0.067237 | -20.935853 | 0.913996  |

|     |   |           |            |           |     |    |           |            |           |
|-----|---|-----------|------------|-----------|-----|----|-----------|------------|-----------|
| 89  | O | -0.178034 | -19.442858 | -1.001651 | 101 | H  | 1.278708  | -22.093086 | 2.150963  |
| 90  | C | -1.281722 | -21.062786 | 1.852838  | 102 | Cl | 2.203192  | 0.117650   | 2.132884  |
| 91  | C | -0.137541 | -22.031344 | -0.152721 | 103 | Cl | -2.203192 | -0.117650  | 2.132884  |
| 92  | C | 1.239590  | -21.091231 | 1.713786  | 104 | C  | 0.289387  | 15.534652  | -3.118109 |
| 93  | H | -1.255360 | -20.345006 | 2.677710  | 105 | H  | 0.343022  | 14.872151  | -3.980591 |
| 94  | H | -1.296212 | -22.064395 | 2.292186  | 106 | H  | -0.589134 | 16.181047  | -3.206370 |
| 95  | H | -2.219157 | -20.919100 | 1.307376  | 107 | H  | 1.195384  | 16.146070  | -3.068923 |
| 96  | H | -1.054118 | -21.955385 | -0.742165 | 108 | C  | -0.289387 | -15.534652 | -3.118109 |
| 97  | H | -0.120570 | -23.010409 | 0.334283  | 109 | H  | -0.343022 | -14.872151 | -3.980591 |
| 98  | H | 0.710554  | -21.973418 | -0.839031 | 110 | H  | 0.589134  | -16.181047 | -3.206370 |
| 99  | H | 1.321505  | -20.374405 | 2.535797  | 111 | H  | -1.195384 | -16.146070 | -3.068923 |
| 100 | H | 2.114647  | -20.969439 | 1.068523  |     |    |           |            |           |

## 7. Absorption spectra

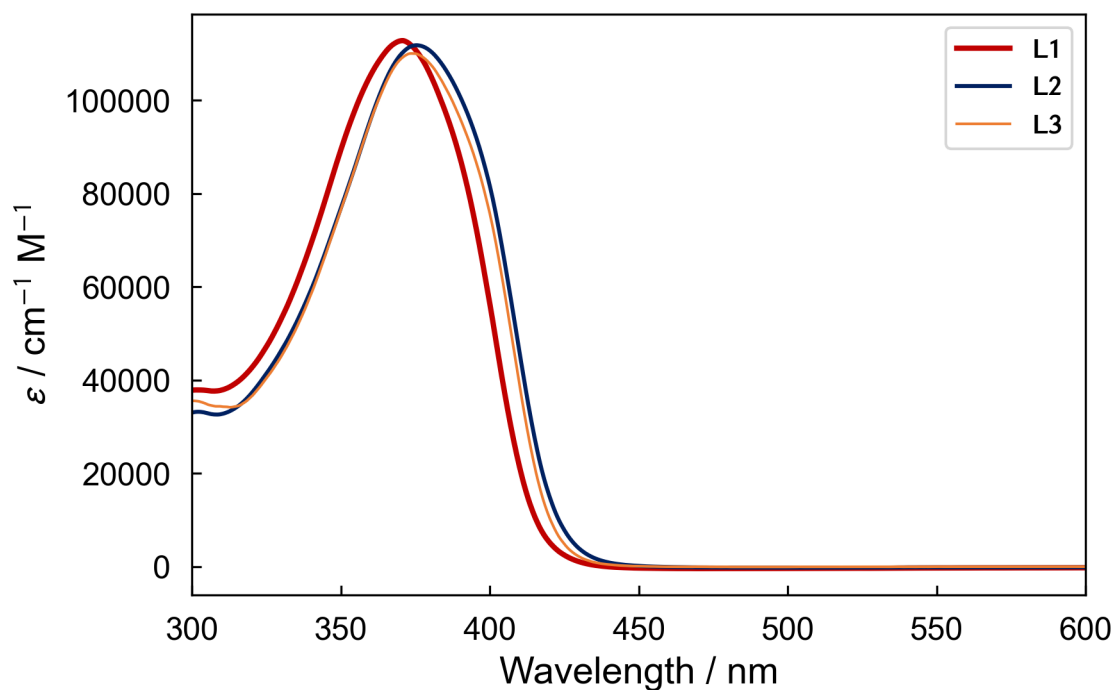

Fig. S44 Absorption spectra of **L1**–**L3** (in DMF,  $1 \times 10^{-5}$  M).

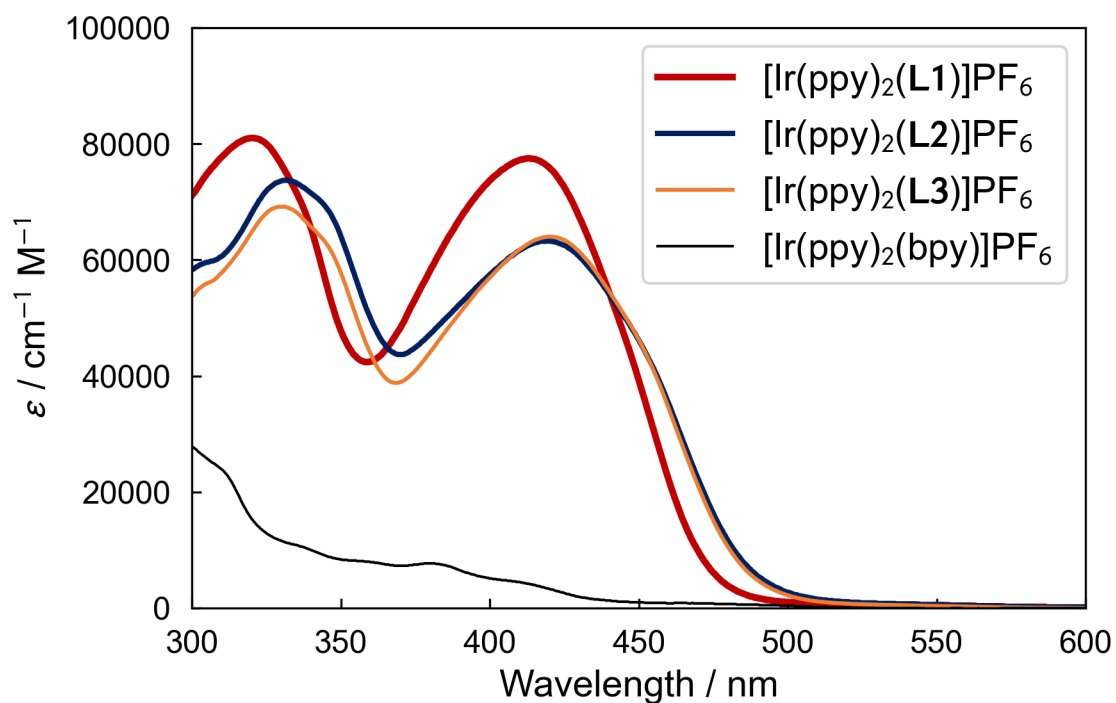

Fig. S45 Absorption spectra of [Ir(ppy)<sub>2</sub>(**L1**)]PF<sub>6</sub>, [Ir(ppy)<sub>2</sub>(**L2**)]PF<sub>6</sub>, [Ir(ppy)<sub>2</sub>(**L3**)]PF<sub>6</sub>, and [Ir(ppy)<sub>2</sub>(bpy)]PF<sub>6</sub> (in CH<sub>2</sub>Cl<sub>2</sub>,  $1 \times 10^{-5}$  M).

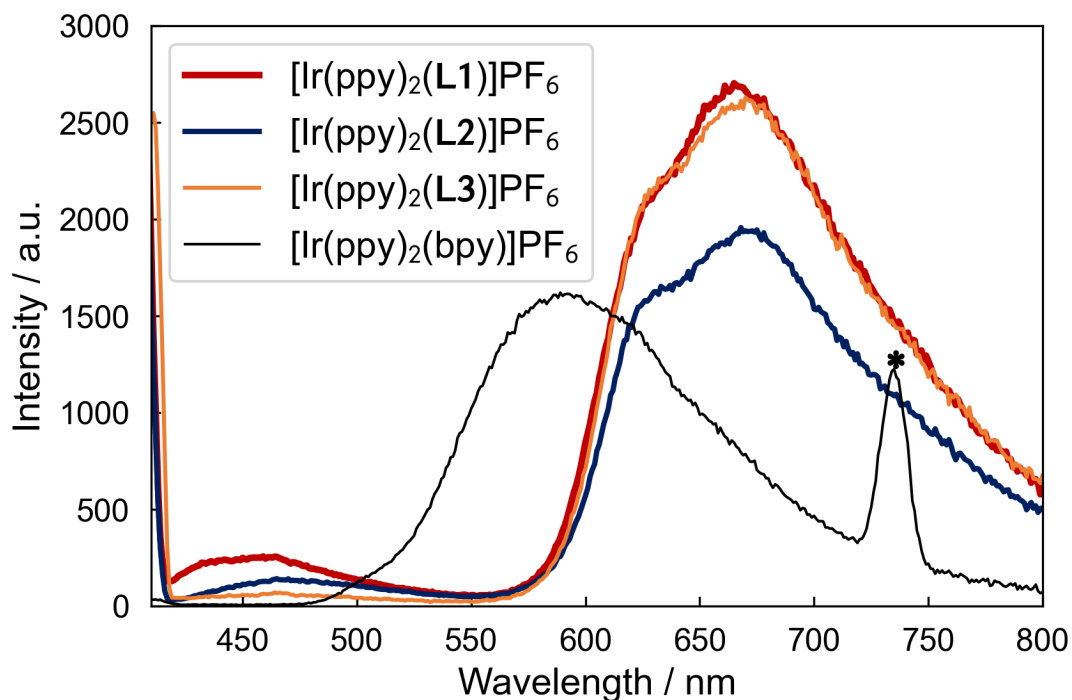

Fig. S46 Emission spectra of [Ir(ppy)<sub>2</sub>(L1)]PF<sub>6</sub>, [Ir(ppy)<sub>2</sub>(L2)]PF<sub>6</sub>, [Ir(ppy)<sub>2</sub>(L3)]PF<sub>6</sub>, and [Ir(ppy)<sub>2</sub>(bpy)]PF<sub>6</sub> (in CH<sub>2</sub>Cl<sub>2</sub>, 1 × 10<sup>-6</sup> M, under N<sub>2</sub> atmosphere, excited at 405, 405, 405, 365 nm, respectively). The asterisk indicates the second order of excitation wavelength.

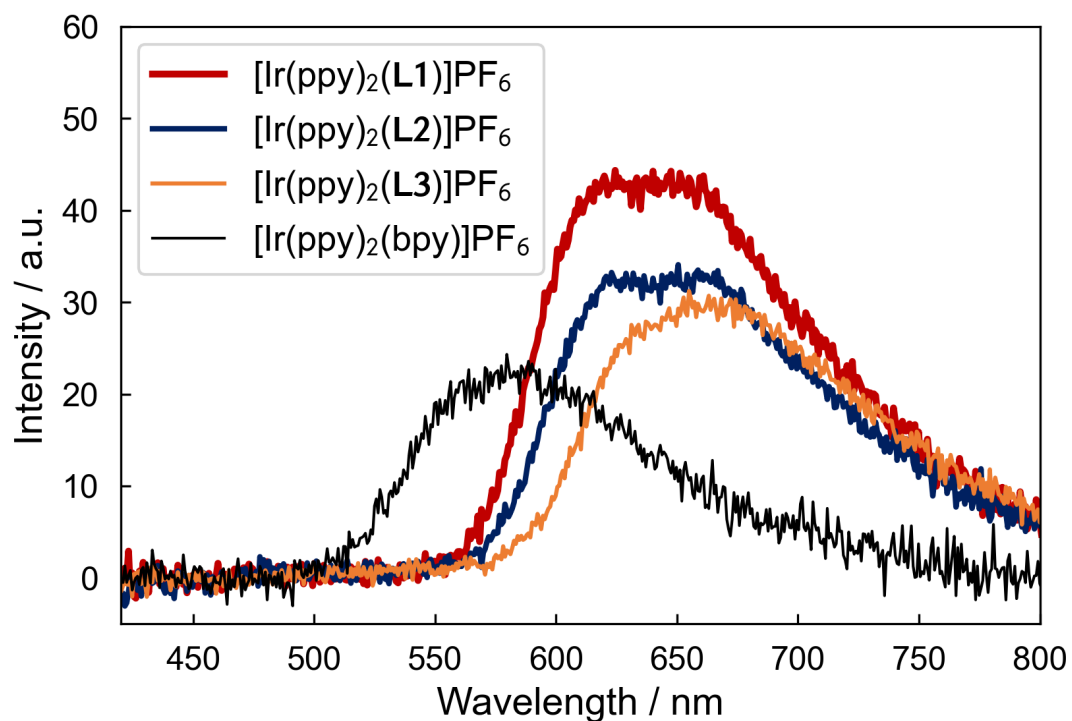

Fig. S47 Emission spectra of [Ir(ppy)<sub>2</sub>(L1)]PF<sub>6</sub>, [Ir(ppy)<sub>2</sub>(L2)]PF<sub>6</sub>, [Ir(ppy)<sub>2</sub>(L3)]PF<sub>6</sub>, and [Ir(ppy)<sub>2</sub>(bpy)]PF<sub>6</sub> in solid states under N<sub>2</sub> atmosphere (excited at 405, 405, 405, 365 nm, respectively).

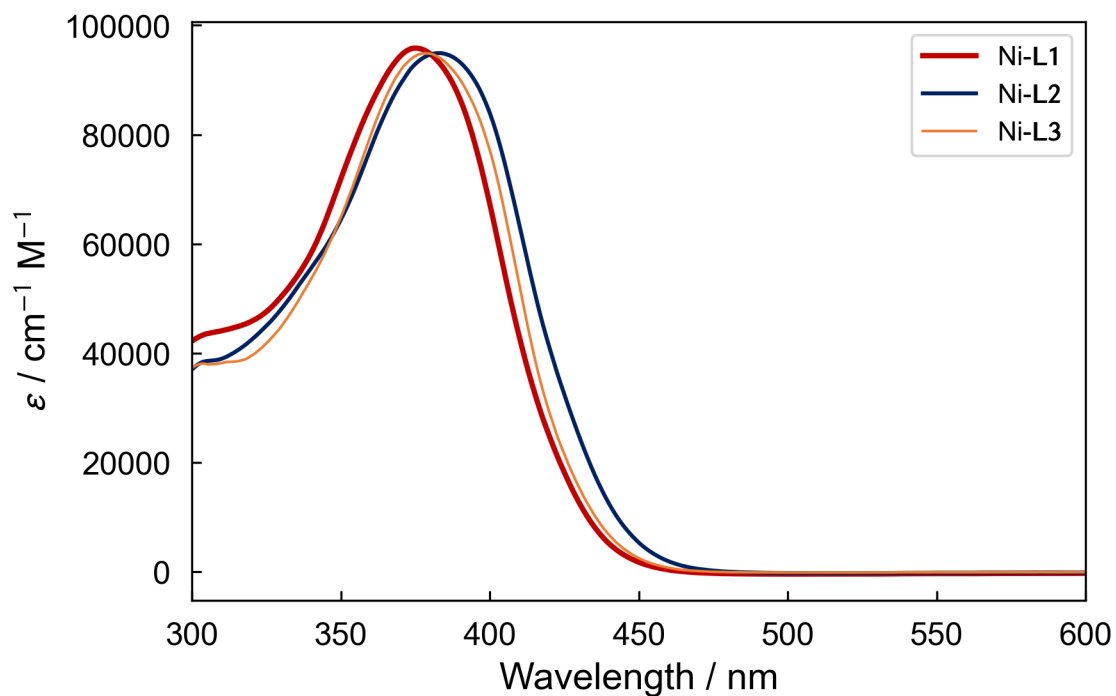

Fig. S48 Absorption spectra of Ni-L1, Ni-L2, and Ni-L3 systems (in DMF,  $1 \times 10^{-5}$  M), which were prepared *in situ* from  $\text{NiCl}_2 \cdot \text{DME}$  with L1, L2 and L3, respectively (1:1).

### 8. Cyclic voltammetry

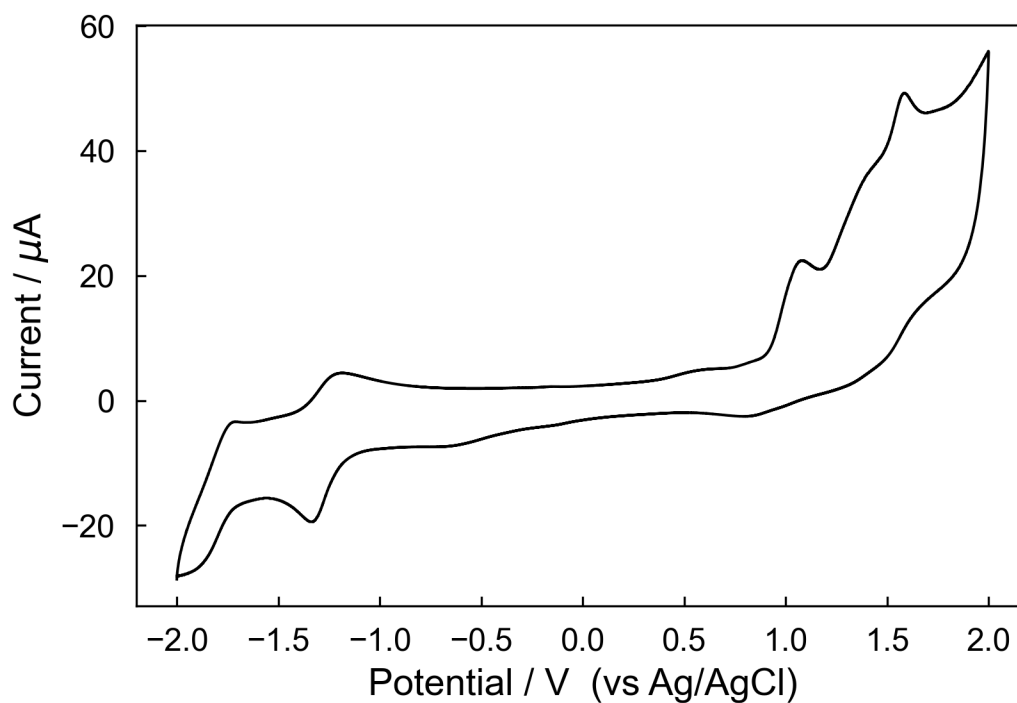

Fig. S49 Cyclic voltammogram of  $[\text{Ir}(\text{ppy})_2(\text{L1})]\text{PF}_6$  (in degassed MeCN, 1 mM with 0.1 M  $n\text{Bu}_4\text{NPF}_6$  at a scan rate of 100 mV/s).



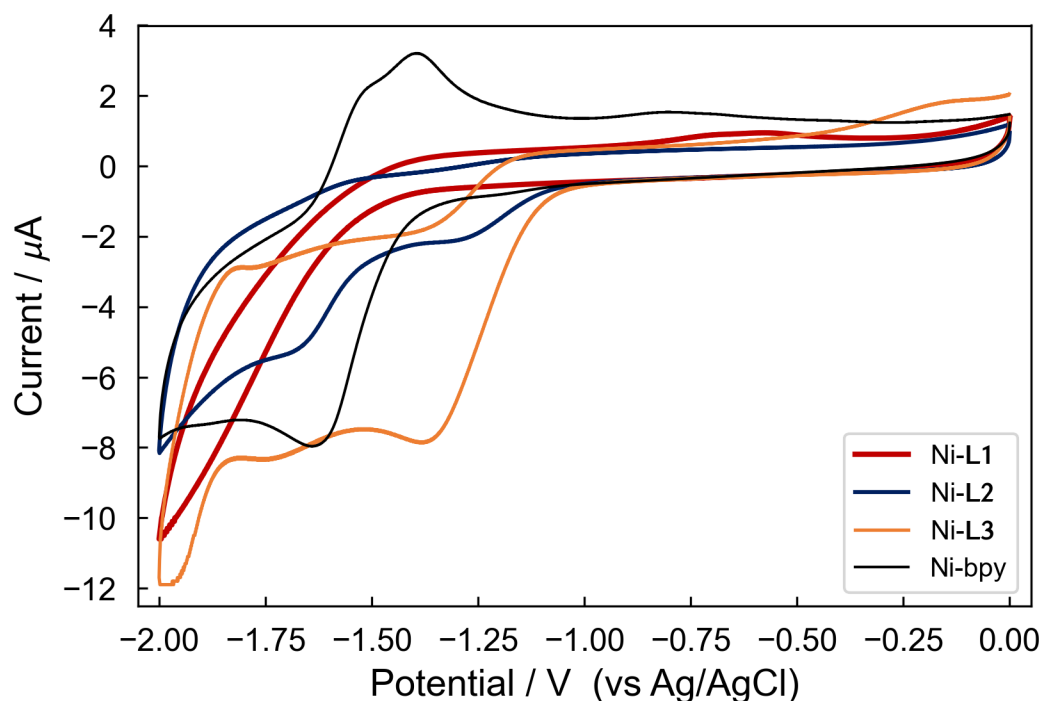

Fig. S50 Cyclic voltammogram of Ni-L1, Ni-L2, Ni-L3 and Ni-bpy systems, which were prepared *in situ* from NiCl<sub>2</sub>·DME with L1, L2, L3, and bpy, respectively (1:1) (in degassed DMF, 0.5 mM with 0.05 M *n*Bu<sub>4</sub>NPF<sub>6</sub> at a scan rate of 100 mV/s). The cyclic voltammogram of Ni-L1 system shows no distinct reduction peaks.

### 9. Mass and NMR spectroscopic studies on the coordination of L1 to Ni

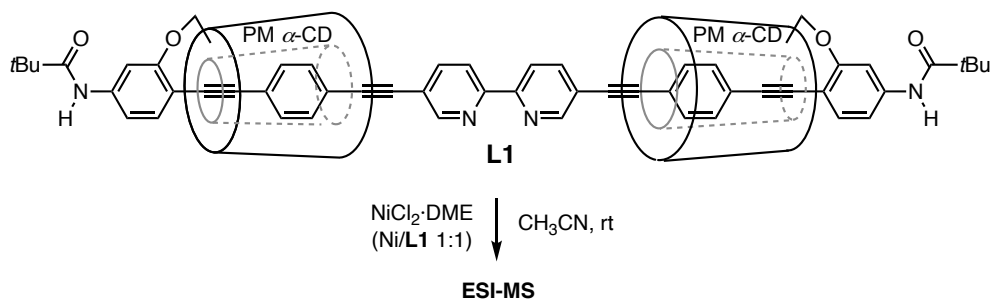

The reaction mixture of NiCl<sub>2</sub>·DME and L1 (1:1) in CH<sub>3</sub>CN was analyzed by ESI-MS (Figure S51). The ESI-mass peaks *m/z* 1645.8 and 1616.3 correspond to the mass of cationic Ni-L1 monochloride complex sodium adduct [ $\{\text{NiCl}(\text{L1})\}+\text{Na}\}^{2+}$  (*m/z* 1645.2, calculated) and dicationic Ni-L1 complex [ $\text{Ni}(\text{L1})\}^{2+}$  (*m/z* 1615.7, calculated), respectively. The minor peak *m/z* 1674.8 which corresponds to neutral Ni-L1 dichloride complex disodium adduct [ $\{\text{NiCl}_2(\text{L1})\}+2\text{Na}\}^{2+}$  (*m/z* 1674.2, calculated) is also detected. These results indicate that L1 coordinate to the Ni center in which at least one chloride ion is bound.

In the <sup>1</sup>H NMR measurement of the mixture of NiCl<sub>2</sub>·DME and L1 (1:1) in CD<sub>3</sub>CN, the unique broad peaks appeared in the paramagnetic region of the Ni complex (~62, ~159 ppm in Figure S52).<sup>8</sup> Thus, the NiCl<sub>2</sub>-L1 complex is assigned as a paramagnetic species.

# Generic Display Report (all)

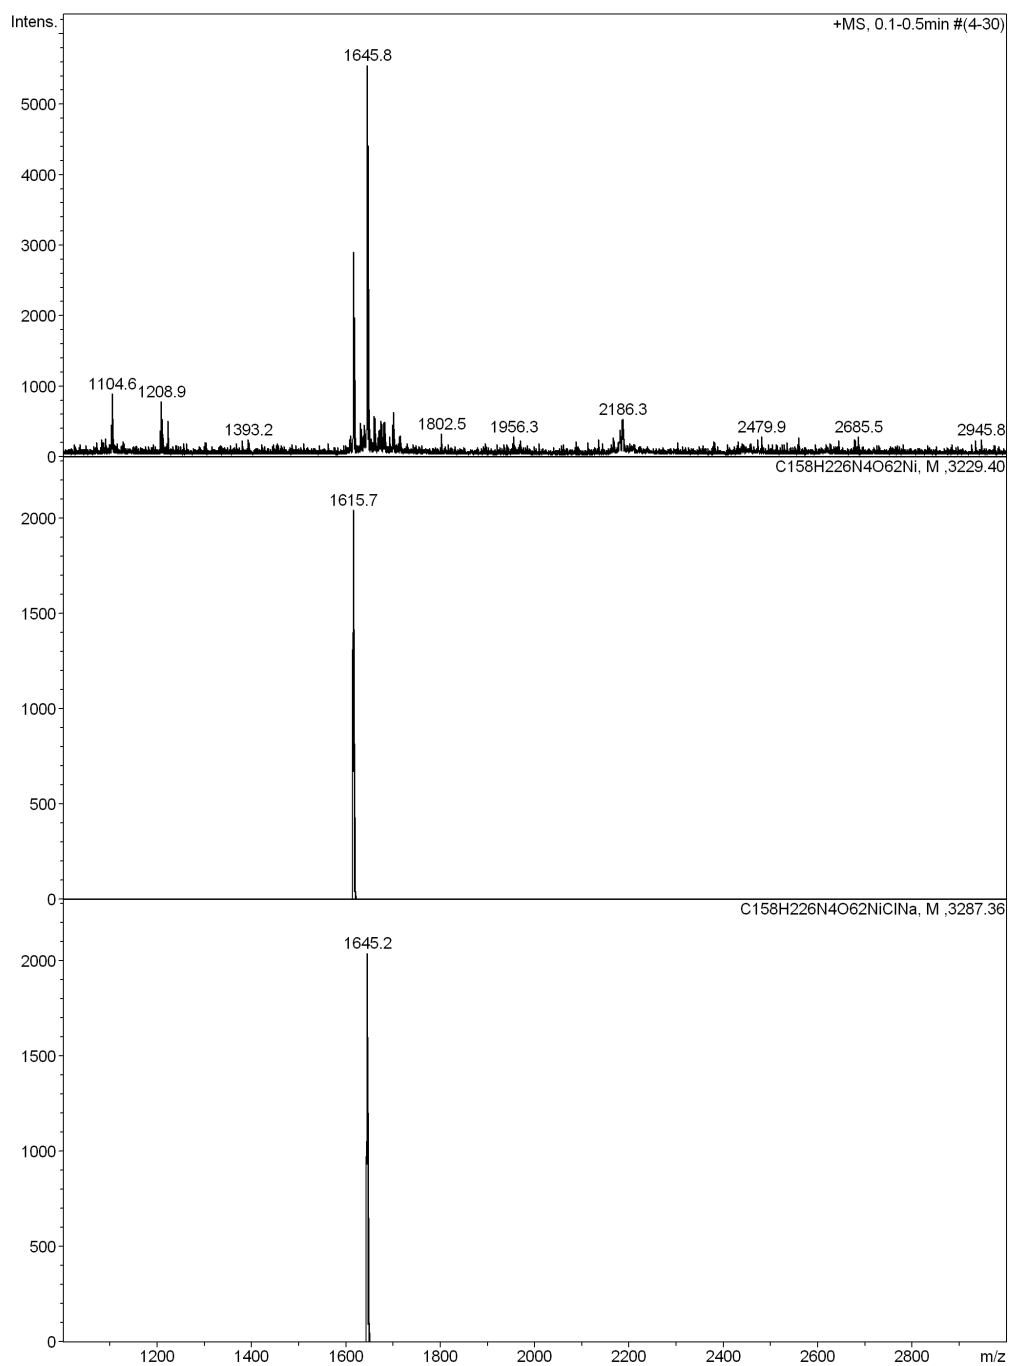

Bruker Compass DataAnalysis 4.0

printed: 3/29/2024 2:29:34 AM

Page 1 of 1

Figure S51 ESI mass spectrum of the mixture of  $\text{NiCl}_2 \cdot \text{DME}$  and **L1** (in  $\text{CH}_3\text{CN}$ , 1:1), and simulate pattern

# Generic Display Report (all)

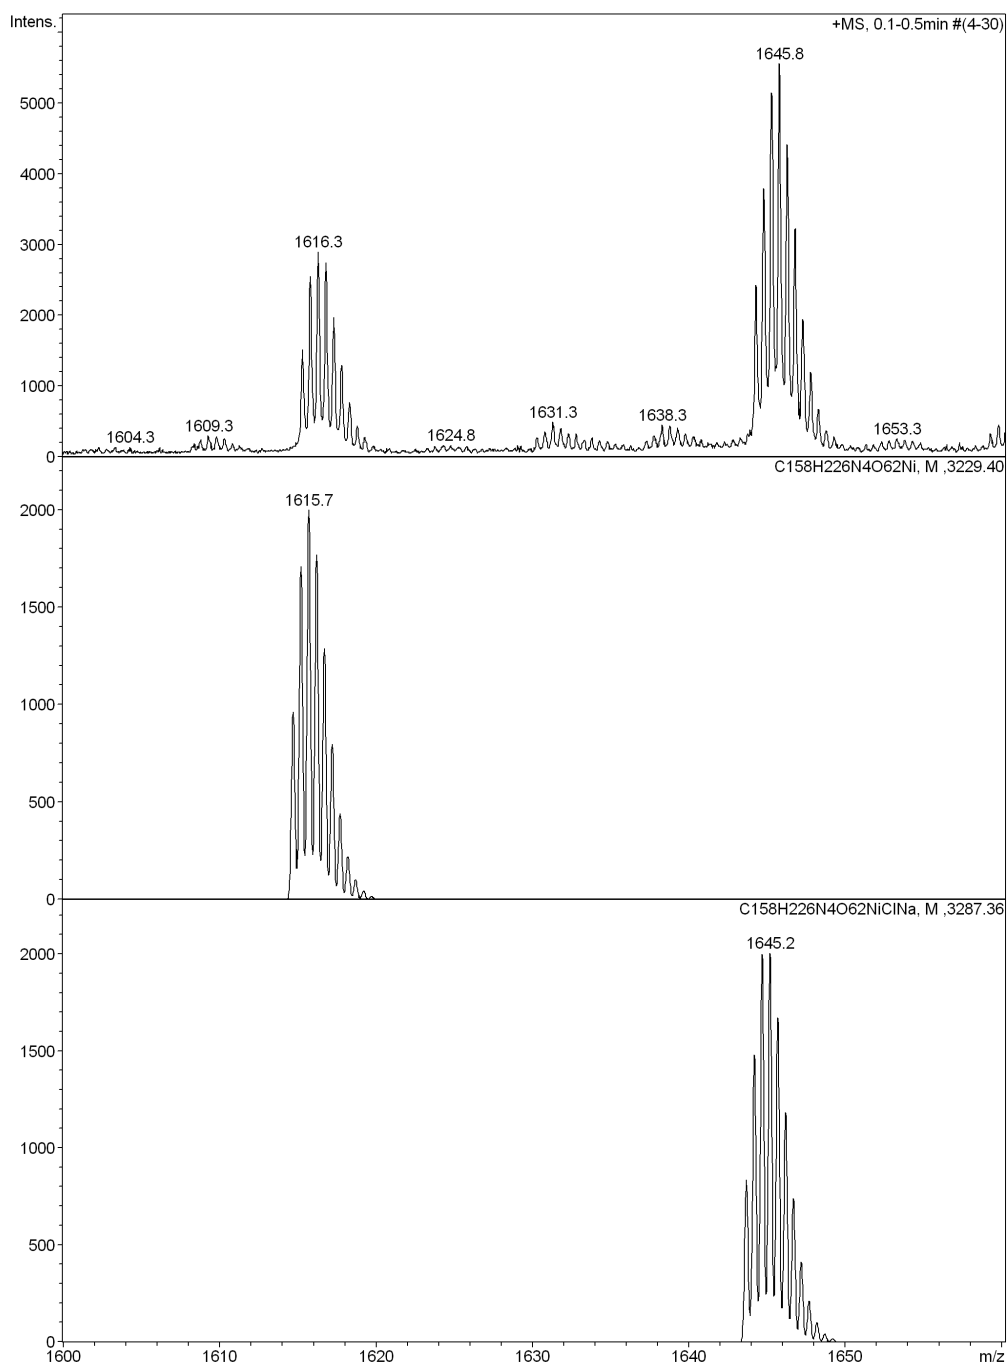

Figure S51 (continued) Local enlarged view from  $m/z$  1600 to 1660

Generic Display Report (all)

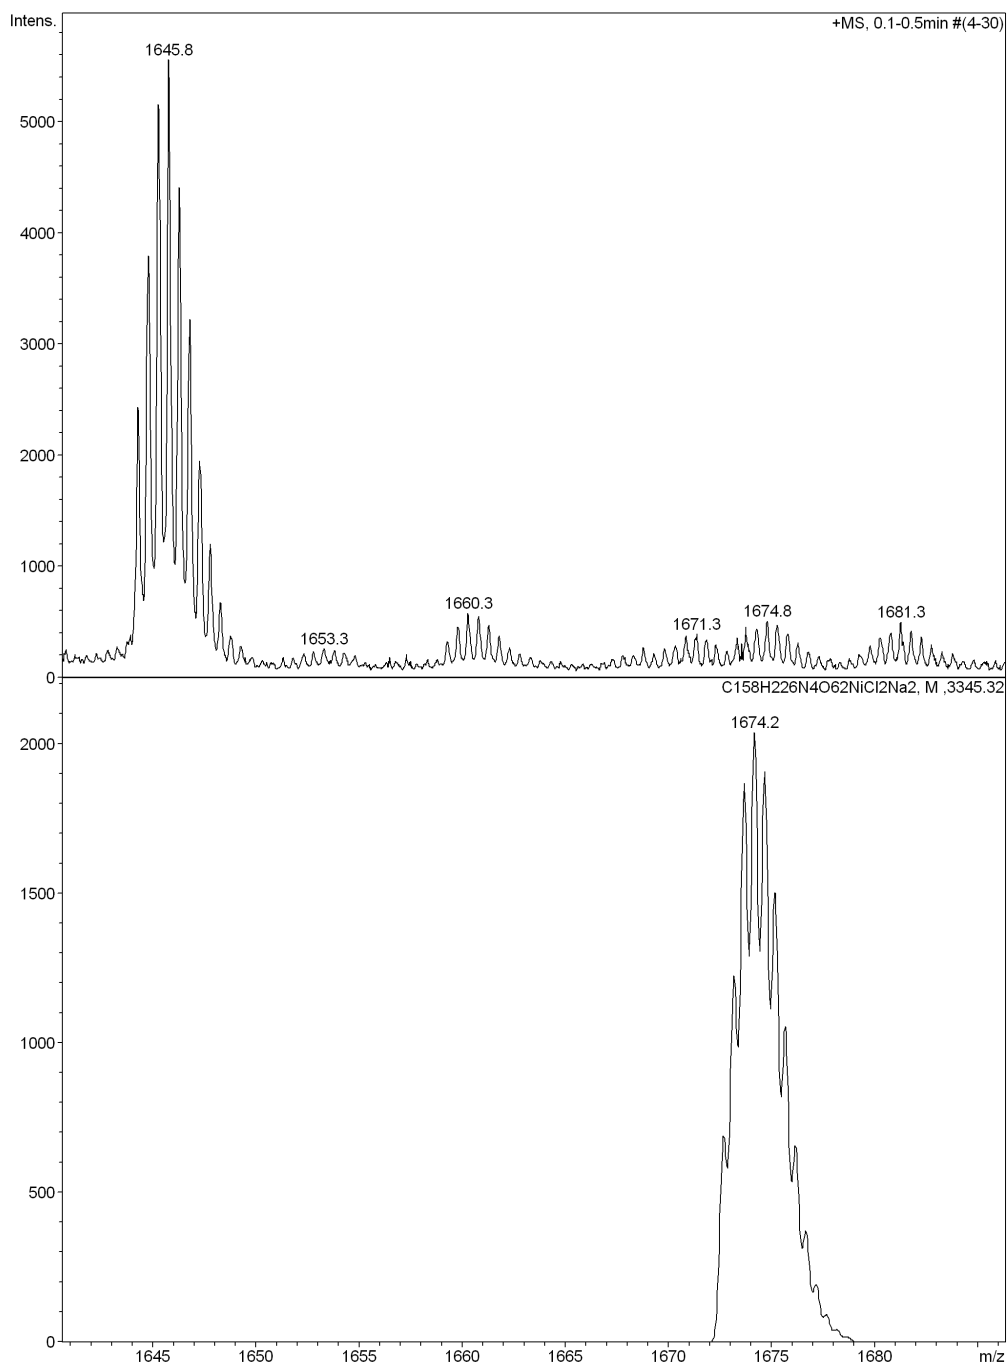

Figure S51 (continued) Local enlarged view from  $m/z$  1640 to 1686

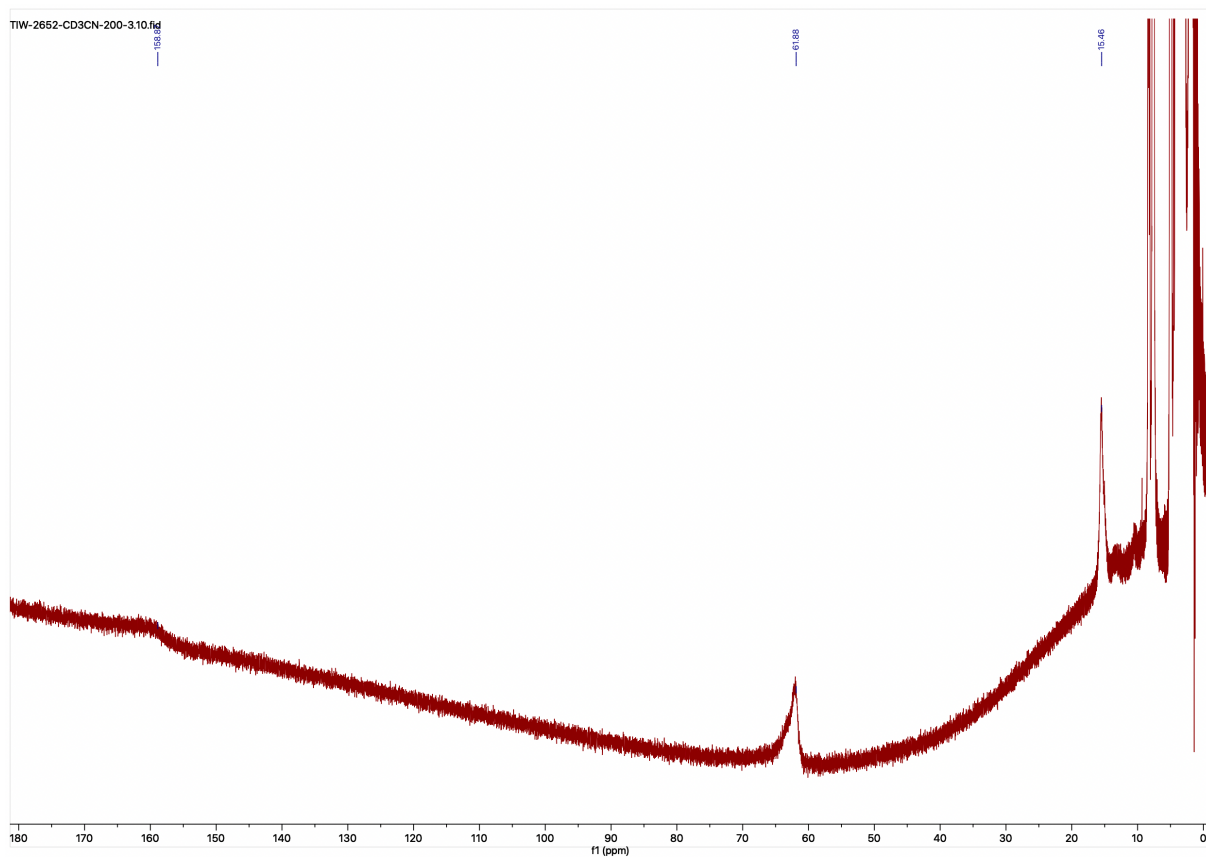

Figure S52  $^1\text{H}$  NMR spectrum (500 MHz,  $\text{CD}_3\text{CN}$ ) of the unique paramagnetic peaks in the mixture of  $\text{NiCl}_2\cdot\text{DME}$  and **L1** (1:1)

## Abbreviation

|             |                                     |                 |                                                       |
|-------------|-------------------------------------|-----------------|-------------------------------------------------------|
| bpy         | 2,2'-bipyridine                     | Me              | methyl                                                |
| Bu          | butyl                               | min             | minute(s)                                             |
| d           | day(s)                              | NMR             | nuclear magnetic resonance                            |
| DABCO       | 1,4-diazabicyclo[2.2.2]octane       | MS              | mass spectrometer                                     |
| DFT         | density functional theory           | NTO             | natural transition orbital                            |
| DMA         | <i>N,N</i> -dimethylacetamide       | Ph              | phenyl                                                |
| DME         | 1,2-dimethoxyethane                 | PM $\alpha$ -CD | permethylated $\alpha$ -cyclodextrin                  |
| DMF         | <i>N,N</i> -dimethylformamide       | ppy             | 2-phenylpyridine                                      |
| ESI         | electrospray ionization             | QY              | quantum yield                                         |
| Et          | ethyl                               | ROESY           | rotating frame nuclear overhauser effect spectroscopy |
| GPC         | gel permeation chromatography       | rt              | room temperature                                      |
| h           | hour(s)                             | <i>t</i> Bu     | <i>tert</i> -butyl                                    |
| HOMO        | highest occupied molecular orbital  | TD              | time-dependent                                        |
| HR          | high resolution                     | THF             | tetrahydrofuran                                       |
| <i>i</i> Pr | isopropyl                           | ToF             | time of flight                                        |
| LUMO        | lowest unoccupied molecular orbital |                 |                                                       |

## References

1. H. Masai, J. Terao, T. Fujihara and Y. Tsuji, *Chem. Eur. J.*, 2016, **22**, 6624–6630.
2. A. B. Pangborn, M. A. Giardello, R. H. Grubbs, R. K. Rosen and F. J. Timmers, *Organometallics*, 1996, **15**, 1518–1520.
3. T. Kawabata and H. Matsubara, *Tetrahedron Lett.*, 2023, **123**, 154554.
4. D.-L. Zhu, J. Li, Q. Wu, Y. Wang, D. J. Young and H.-X. Li, *Synthesis*, 2023, **55**, 637–646.
5. S. Wang, J. Liu, L. Niu, H. Yi, C.-W. Chiang and A. Lei, *J. Photochem. Photobiol. A*, 2018, **355**, 120–124.
6. N. Noto, A. Yada, T. Yanai and S. Saito, *Angew. Chem., Int. Ed.*, 2023, **62**, e202219107.
7. S. Sharif, R. P. Rucker, N. Chandrasoma, D. Mitchell, M. J. Rodriguez, R. D. J. Froese and M. G. Organ, *Angew. Chem., Int. Ed.*, 2015, **54**, 9507–9511.
8. M. M. Beromi, G. W. Brudvig, N. Hazari, H. M. C. Lant and B. Q. Mercado, *Angew. Chem., Int. Ed.*, 2019, **58**, 6094–6098.
